# Supplementary material for: Measles vaccine hesitancy among caregivers of children aged 12–35 months in the Biyem-Assi Health District, Yaoundé, Cameroon: a cross-sectional study
Source: Research Square preprint supplement (doi:10.21203/rs.3.rs-5936612/v1), 2025-09-23
Supplement: Supplementary file 1 [file 7df2d1dd7f5dfe97e7f8624b.pdf]

# THEME: "Coverage and determinants of access to two doses of measles vaccine in children aged 12 to 35 months in the Biyem-Assi health district".

## PARENT/GUARDIAN QUESTIONNAIRE

Respondent ID \_\_\_\_\_

Date \_\_\_\_\_

| N°                                       | Questions                                                   | Terms and conditions                                                                                                                | Answers |
|------------------------------------------|-------------------------------------------------------------|-------------------------------------------------------------------------------------------------------------------------------------|---------|
| <b>Section 1: Socio-demographic data</b> |                                                             |                                                                                                                                     |         |
| S1Q1                                     | Age                                                         |                                                                                                                                     |         |
| S1Q2                                     | Gender of the person responsible for vaccinating the child. | 1. Men<br>2. Woman                                                                                                                  |         |
|                                          | Relationship with the child.                                | 1. Parent<br>2. Tutor                                                                                                               |         |
| S1Q3                                     | Marital status                                              | 1. Married<br>2. Single<br>3. Common-law union<br>4. Widowed                                                                        |         |
| S1Q4                                     | Profession                                                  | 1. Public sector employee<br>2. Private sector employee<br>3. Household<br>4. Farmer<br>5. Independent<br>6. Unemployed<br>7. Other |         |
| S1Q5                                     | Monthly household income                                    | 1. Less than 60,000 FCFA<br>2. Between 60,001 and 100,000 FCFA<br>3. Between 100,001 and 300,000 FCFA<br>4. More than 300,000 FCFA  |         |

|                             |                                                 |                                                                                                                                                                              |  |
|-----------------------------|-------------------------------------------------|------------------------------------------------------------------------------------------------------------------------------------------------------------------------------|--|
| S1Q6                        | Level of study                                  | 1.superior<br>2.secondary<br>3.primary<br>4.None                                                                                                                             |  |
| S1Q7                        | Health area                                     | 1. Akok-Ndoe<br>2. Biscuits<br>3. Biyem-assi 1<br>4. Biyem-assi 2<br>5. Elig-Effa<br>6. Etoug-Ebe<br>7. Melen<br>8. Mendong<br>9. Nkolbikok<br>10. Simbock<br>11. Mvog betsi |  |
| S1Q8                        | Neighbourhood                                   |                                                                                                                                                                              |  |
| <b>Section 2: Knowledge</b> |                                                 |                                                                                                                                                                              |  |
| S2Q1                        | Have you ever heard of measles?                 | 1. Yes<br>2. No                                                                                                                                                              |  |
| S2Q2                        | Do you know what measles is?                    | 1. Yes<br>2. No                                                                                                                                                              |  |
| S2Q3                        | If so, what do you think it is?                 | 1. A food product<br>2. A means used by the whites to weaken the blacks.<br>3. A highly contagious infectious disease<br>4. Other                                            |  |
| S2Q4                        | Do you know the signs and symptoms of measles?  | 1. Yes<br>2. No                                                                                                                                                              |  |
| S2Q5                        | What symptoms of measles are you familiar with? | 1. Coughing,<br>2. Runny nose,<br>3. Eyes aflame,<br>4. Sore throats,<br>5. Fever<br>6. Red skin covered in spots<br>7. Other                                                |  |

|       |                                                                      |                                                                                                                                                                                                                |  |
|-------|----------------------------------------------------------------------|----------------------------------------------------------------------------------------------------------------------------------------------------------------------------------------------------------------|--|
| S2Q6  | Do you know how measles is transmitted?                              | 1. Yes<br>2. No                                                                                                                                                                                                |  |
| S2Q7  | If so, how?                                                          | 1. Respiratory droplets<br>2. Direct contact with secretions from the nose and throat of an infected person<br>3. Holding hands with an infected person<br>4. Eating from the same plate as an infected person |  |
| S2Q8  | How can measles be prevented?                                        | 1. Wash your hands regularly,<br>2. Ensure good hygiene,<br>3. Cover your nose and mouth when coughing or sneezing,<br>4. Getting vaccinated<br>5. Other                                                       |  |
| S2Q9  | Do you know which vaccines are recommended for children aged 0 to 5? | 1. Yes<br>2. No                                                                                                                                                                                                |  |
| S2Q10 | If yes, please specify                                               | 1. BCG<br>2. Penta<br>3. Rota<br>4. Pneumo<br>5. VPO<br>6. VPI<br>7. Polio<br>8. RR<br>9. VAA<br>10. Men A                                                                                                     |  |
| S2Q11 | Do you know when your child should be vaccinated against measles?    | 1. Yes<br>2. No                                                                                                                                                                                                |  |

|                                        |                                                                               |                                                                                                                                                                                                                      |  |
|----------------------------------------|-------------------------------------------------------------------------------|----------------------------------------------------------------------------------------------------------------------------------------------------------------------------------------------------------------------|--|
| S2Q12                                  | When should he be vaccinated for the 1 <sup>st</sup> dose of measles vaccine? | 1. Between 9 and 12 months<br>2. At 9 months<br>3. At 6 months<br>4. At 15 months<br>5. It doesn't matter how old they are, they can be vaccinated at any time.                                                      |  |
| S2Q13                                  | When should he be vaccinated for the 2 <sup>nd</sup> dose of measles vaccine? | 1. Between 15 and 18 months<br>2. At 15 months<br>3. At 9 months<br>4. At 35 months<br>5. It doesn't matter how old they are, they can be vaccinated at any time.                                                    |  |
| S2Q14                                  | If you have a case of measles in your home, how do you react?                 | 1. I'm going to hospital<br>2. I'm making her an herbal tea<br>3. I took him to the village<br>4. I isolate him from the other children<br>5. I go to the traditional healer<br>6. I'm going to see my pastor/priest |  |
| <b>Section 3: Habits and practices</b> |                                                                               |                                                                                                                                                                                                                      |  |
| S3Q1                                   | Are you in favour of measles vaccination for children?                        | 1. Yes<br>2. No                                                                                                                                                                                                      |  |
| S3Q2                                   | If yes, have you had your child(ren) vaccinated against measles?              | 1. Yes<br>2. No                                                                                                                                                                                                      |  |
| S3Q3                                   | If yes, why?                                                                  | 1. Recommendation by a healthcare professional;<br>2. Raising awareness through the media;<br>3. Knowledge of the complications of measles;                                                                          |  |

|      |                                                           |                                                                                                                                                                                                                                                                                                                                                                                           |  |
|------|-----------------------------------------------------------|-------------------------------------------------------------------------------------------------------------------------------------------------------------------------------------------------------------------------------------------------------------------------------------------------------------------------------------------------------------------------------------------|--|
|      |                                                           | 4. Protecting my child against illness;<br>1. Other (please specify)                                                                                                                                                                                                                                                                                                                      |  |
| S3Q4 | If not, why not?                                          | 1. Lack of information on vaccination;<br>2. Fears about the side effects of vaccination;<br>3. Safety and efficiency concerns<br>4. Personal or religious beliefs;<br>5. Lack of time to take my child for vaccinations;<br>6. Influence of erroneous sources of information<br>7. Long distance to the nearest health facility with a vaccination service;<br>5. Other (please specify) |  |
| S3Q5 | Have you ever heard or read anything against vaccination? | 1. Yes<br>2. No                                                                                                                                                                                                                                                                                                                                                                           |  |
| S3Q6 | If so, from what sources?                                 | 1. Television<br>2. Radio<br>3. Sign<br>4. Written press<br>5. Brochure<br>6. Flyers<br>7. Internet<br>8. Social networks (Facebook, twitter, Tiktok, YouTube, WhatsApp, Instagram, etc.)<br>9. Word of mouth" in the neighbourhood<br>10. Health staff<br>11. Other                                                                                                                      |  |
| S3Q7 | What was this information?                                |                                                                                                                                                                                                                                                                                                                                                                                           |  |

|       |                                                                                         |                                                                                                                                                                                                                                           |  |
|-------|-----------------------------------------------------------------------------------------|-------------------------------------------------------------------------------------------------------------------------------------------------------------------------------------------------------------------------------------------|--|
| S3Q8  | Have you shared information with others in your community?                              | 1. Yes<br>2. No                                                                                                                                                                                                                           |  |
| S3Q9  | How did this information affect your decision to vaccinate your child?                  | 1. Nothing has changed<br>2. I have some doubts<br>3. I can no longer have my children vaccinated                                                                                                                                         |  |
| S3Q10 | Would you like to receive more information about measles and how to combat the disease? | 1. Yes<br>1. No                                                                                                                                                                                                                           |  |
| S3Q11 | If so, how would you prefer to receive this information?                                | 1. Printed brochures or leaflets;<br>2. Online videos or tutorials;<br>3. Information meetings led by healthcare professionals;<br>4. Debates, advertising, TV bandwidth;<br>5. Spotlight on social networks<br>6. Other (please specify) |  |

## CHILDREN'S QUESTIONNAIRE

| Child data                 |                                                                          |                                                                                                                |  |
|----------------------------|--------------------------------------------------------------------------|----------------------------------------------------------------------------------------------------------------|--|
| 1                          | Child's age (in months)                                                  |                                                                                                                |  |
| 2                          | Child's gender                                                           | 1. G<br>2. F                                                                                                   |  |
| 3                          | Child's guardian<br>(person responsible<br>for vaccinating the<br>child) | 1. Mother<br>2. Sister<br>3. Aunt<br>4. Cousin<br>5. Father<br>6. Uncle<br>7. Brother<br>8. Cousin<br>9. Other |  |
| Child's vaccination status |                                                                          |                                                                                                                |  |
| 1                          | Has your child had the<br>first dose of measles<br>vaccine?              | 1. Yes<br>2. No<br>3. I don't know                                                                             |  |
| 2                          | If yes, at what age (child's age in months at<br>vaccination)?           |                                                                                                                |  |

| 3                             | Has your child had the<br>second dose of<br>measles vaccine?   | 1. Yes<br>2. No<br>3. I don't know |  |
|-------------------------------|----------------------------------------------------------------|------------------------------------|--|
| 4                             | If yes, at what age (child's age in months at<br>vaccination)? |                                    |  |
| 5                             | Do you have your<br>vaccination<br>certificate?                | 1. Yes<br>2. No                    |  |
| Review of vaccination records |                                                                |                                    |  |
| 1                             | Child's date of birth                                          |                                    |  |
| 2                             | Date of vaccination of 1 <sup>re</sup> dose.                   |                                    |  |
| 3                             | Date of vaccination of the 2 <sup>eme</sup> dose.              |                                    |  |
