# Supplementary material for: Measles vaccine hesitancy among caregivers of children aged 12–35 months in the Biyem-Assi Health District, Yaoundé, Cameroon: a cross-sectional study
Source: Research Square preprint supplement (doi:10.21203/rs.3.rs-5936612/v1), 2025-09-23
Supplement: Supplementary file 1 [file e4d7467c4e79f4fb293b9442.xlsx]

## Sheet: Feuil1
IDENTIFICATION OF THE RESPONDANTS	AGE	SEX OF THE CAREGIVER	RELATIOSHIP WITH THE CHILD	MARITAL STATUS	PROFESSION	OTHER PROFESSION	MENSUAL INCOME OF THE HOUSEHOLD	LEVEL OF EDUCATION	HEALTH AREA	NEIGHBORHOOD	ARE YOU IN FAVOR OF MEASLES VACCINATION FOR CHILDREN?	HAVE YOU HAD YOUR CHIL(REN) VACCINATED AGAINST MEASLES?	RECOMMENDATION BY A HEALTHCARE PROFESSIONNAL	RAISING AWARENESS THROUGH TH MEDIA	KNOWLEDGE OF THE COMPLICATIONS OF MEALSES	PROTECTING MY CHILD AGAINST ILLNESS	OTHERS REASONS FOR VACCINATION	SPECIFY THE OTHERS REASONS	LACK OF INFORMATION ON VACCINATION	FEARS ABOUT THE SIDE EFFECTS OF THE VACCINATION	SAFETY AND EFFICIENCY CONCERNS	PERSONNAL OR RELIGIOUS BELIEFS	LACK OF TIME TO TAKE MY CHILD FOR VACCINATIONS	INFLUENCE OF ERRONEOUS SOURCES OF INFORMATION	LONG DISTANCE TO THE NEAREST HEALTH FACILITY WITH A VACCINATION SERVICE	OTHERS REASONS FOR NON VACCINATINS	SPECIFY THE OTHERS REASONS	CHILD'S AGE	CHILD'S GENDER	CHILD'S CAREGIVER (person in charge of vaccinationg the child)	IF OTHER CAREGIVER? SPECIFY	HAS YOUR CHILD HAD THE FIRST DOSE OF MEASLES VACCINE?	IF "YES", AT WHAT AGE FOR DOSE 1	HAS YOUR CHILD HAD THE SECOND DOSE OF MEASLES VACCINE?	IF "YES", AT WHAT AGE FOR DOSE 2	DO YOU HAVE YOUR VACCINATION RECORD?	CHILD'S DATE OF BIRTH	DATE OF VACCINATION OF FIRST DOSE	DATE OF VACCINATION OF SECOND DOSE	AGE OF ADMINISTRATION OF THE 1st DOSE	AGE OF ADMINISTRATION OF 2nd DOSE	AGE RANGE OF THE CHILD	AGE RANGE OF CAREGIVERS	DELAY FOR MCV1	DELAY FOR MCV2	TOTAL VACCINE DELAY FOR MCV VACCINE	VACCINE REFUSAL	VACCINE HESITANT
1	24	Female	Parent	Unmarried	Housekeeper		less than 60.000FCFA	Secondary	Elig-Effa	ELIG-EFFA IV	Yes	Yes	Yes	No	No	No	No											24	Girl	Mother		Yes	9	No		Yes	2022-03-01	2022-12-22		9		24 to 35 months	<= 24 years	No		No	No	No
2	35	Female	Parent	Unmarried	Others		Between 60.001 and 100.000FCFA	Secondary	Elig-Effa	ELIG-EFFA IV	Yes	Yes	Yes	No	No	No	No											28	Boy	Mother		Yes	10	No		Yes	2021-09-10	2022-07-20		10		24 to 35 months	>= 35 years	Yes		Yes	No	Yes
3	27	Female	Parent	Unmarried	Housekeeper		less than 60.000FCFA	Secondary	Elig-Effa	ELIG-EFFA IV	No	No							Yes	No	No	No	No	No	No	No		28	Boy	Mother		Yes	9	Yes	15	No						24 to 35 months	25 to 34 years				Yes	Yes
4	33	Female	Parent	Married	Housekeeper		less than 60.000FCFA	Secondary	Elig-Effa	ELIG-EFFA IV	Yes	Yes	Yes	No	No	No	No											30	Boy	Mother		Yes	9	Yes	15	Yes	2021-08-18	2022-06-17	2023-01-16	9	16	24 to 35 months	25 to 34 years	No	No	No	No	No
5	34	Female	Parent	Unmarried	Others		less than 60.000FCFA	Primary	Elig-Effa	MELEN 3	Yes	Yes	Yes	No	No	Yes	No											26	Girl	Mother		Yes	9	No		Yes	2022-01-04	2022-11-23		10		24 to 35 months	25 to 34 years	Yes		Yes	No	Yes
6	44	Female	Parent	Unmarried	Others		less than 60.000FCFA	University	Elig-Effa	MELEN 3	Yes	Yes	No	No	No	Yes	No											28	Boy	Mother		I don't know		No		Yes	2021-11-28	2022-08-29		9		24 to 35 months	>= 35 years	No		No	No	No
7	41	Female	Parent	Married	Others		Between 100.001 and 300.000FCFA	University	Elig-Effa	ELIG-EFFA III	Yes	Yes	Yes	No	No	No	No											25	Boy	Mother		Yes	9	Yes	17	Yes	2022-02-10	2022-11-29	2023-07-24	9	17	24 to 35 months	>= 35 years	No	No	No	No	No
8	22	Female	Parent	Unmarried	Others		I don't know	Secondary	Elig-Effa	ELIG-EFFA III	Yes	Yes	Yes	No	No	No	No											26	Boy	Mother		Yes	10	Yes	16	Yes	2022-01-10	2022-11-25	2023-06-02	10	16	24 to 35 months	<= 24 years	Yes	No	Yes	No	Yes
9	33	Male	Parent	Unmarried	Others		I don't know	Secondary	Elig-Effa	MELEN IV	Yes	Yes	Yes	No	No	No	No											18	Girl	Mother		Yes	9	Yes	18	Yes	2022-10-04	2023-07-07	2024-03-04	9	17	12 to 23 months	25 to 34 years	No	No	No	No	No
10	23	Male	Parent	Unmarried	Others		Between 60.001 and 100.000FCFA	Secondary	Elig-Effa	MELEN IV	Yes	Yes	Yes	No	No	Yes	No											30	Boy	Mother		I don't know		I don't know		No						24 to 35 months	<= 24 years				No	No
11	23	Female	Parent	Unmarried	Housekeeper		less than 60.000FCFA	Primary	Elig-Effa	MELEN 3	Yes	No							No	Yes	No	No	No	No	No	No		24	Girl	Mother		No										24 to 35 months	<= 24 years				No	No
12	46	Female	Parent	Unmarried	Others		less than 60.000FCFA	Secondary	Elig-Effa	ELIG-EFFA 2	Yes	No							No	Yes	Yes	No	No	No	No	No		26	Boy	Mother		No										24 to 35 months	>= 35 years				No	No
13	36	Male	Parent	Unmarried	Housekeeper		less than 60.000FCFA	Primary	Elig-Effa	MELEN 3	Yes	Yes	Yes	No	Yes	Yes	No											31	Girl	Mother		Yes	9	Yes	15	Yes	2021-08-14	2022-05-23	2022-11-23	9	15	24 to 35 months	>= 35 years	No	No	No	No	No
14	35	Male	Parent	Unmarried	Others		Between 100.001 and 300.000FCFA	Secondary	Elig-Effa	MELEN 1	Yes	Yes	Yes	No	No	No	No											35	Girl	Mother		Yes	10	Yes	15	No						24 to 35 months	>= 35 years				No	No
15	27	Female	Parent	Unmarried	Housekeeper		less than 60.000FCFA	Secondary	Elig-Effa	ELIG-EFFA 2	Yes	Yes	Yes	No	No	No	No											25	Girl	Mother		Yes	10	Yes	15	No						24 to 35 months	25 to 34 years				No	No
16	30	Female	Parent	Unmarried	Others		less than 60.000FCFA	Secondary	Elig-Effa	MELEN 3	Yes	Yes	Yes	Yes	No	Yes	No											22	Girl	Mother		Yes	9	Yes	15	Yes	2022-05-18	2023-02-20	2023-08-21	9	15	12 to 23 months	25 to 34 years	No	No	No	No	No
17	47	Female	Parent	Married	Others		Between 100.001 and 300.000FCFA	University	Elig-Effa	MELEN 3	Yes	Yes	Yes	No	No	No	No											17	Boy	Mother		Yes	11	No		Yes	2022-09-16	2023-08-04		10		12 to 23 months	>= 35 years	Yes		Yes	No	Yes
18	28	Female	Parent	Unmarried	Housekeeper		less than 60.000FCFA	University	Elig-Effa	MELEN 3	Yes	Yes	Yes	No	Yes	No	No											32	Girl	Mother		Yes	9	I don't know		No						24 to 35 months	25 to 34 years				No	No
19	47	Female	Parent	Unmarried	Others		less than 60.000FCFA	Secondary	Elig-Effa	MELEN 3	Yes	Yes	Yes	No	No	Yes	No											17	Girl	Mother		Yes	9	No		Yes	2022-09-06	2023-06-16		9		12 to 23 months	>= 35 years	No		No	No	No
20	35	Female	Parent	Unmarried	Others		less than 60.000FCFA	Secondary	Elig-Effa	MELEN 3	Yes	Yes	Yes	No	Yes	Yes	No											13	Boy	Mother		Yes	10	No		Yes	2023-03-09	2023-12-18		9		12 to 23 months	>= 35 years	No		No	No	No
21	56	Female	Guadian	Married	Others		Between 60.001 and 100.000FCFA	Secondary	Elig-Effa	MELEN 3	No	No							Yes	No	No	No	No	No	No	No		17	Girl	Mother		Yes	9	No		No						12 to 23 months	>= 35 years				Yes	Yes
22	48	Female	Parent	Unmarried	Others		less than 60.000FCFA	Secondary	Elig-Effa	MELEN 3	Yes	Yes	Yes	No	No	No	No											16	Boy	Mother		I don't know		I don't know		No						12 to 23 months	>= 35 years				No	No
23	24	Female	Parent	Unmarried	Others		less than 60.000FCFA	Secondary	Elig-Effa	MELEN 3	Yes	Yes	Yes	Yes	No	No	No											13	Girl	Father		Yes	9	No		Yes	2023-02-10	2023-11-24		9		12 to 23 months	<= 24 years	No		No	No	No
24	28	Female	Parent	Unmarried	Others		I don't know	Secondary	Elig-Effa	ELIG-EFFA III	Yes	Yes	No	No	Yes	No	No											24	Boy	Mother		Yes	9	Yes	16	Yes	2022-03-04	2022-12-14	2023-06-28	9	15	24 to 35 months	25 to 34 years	No	No	No	No	No
25	36	Female	Parent	Unmarried	Others		I don't know	Secondary	Elig-Effa	ELIG-EFFA III	Yes	Yes	Yes	Yes	No	Yes	No											24	Girl	Mother		Yes	9	Yes	15	Yes	2022-03-17	2022-12-21	2023-06-23	9	15	24 to 35 months	>= 35 years	No	No	No	No	No
26	29	Female	Parent	Unmarried	Housekeeper		less than 60.000FCFA	Secondary	Elig-Effa	MELEN 3	Yes	Yes	No	No	No	Yes	No											34	Girl	Father		Yes	6	Yes	15	Yes	2021-04-14	2022-01-24	2022-07-28	9	15	24 to 35 months	25 to 34 years	No	No	No	No	No
27	36	Male	Guadian	Unmarried	Others		Between 60.001 and 100.000FCFA	Secondary	Elig-Effa	MELEN 3	Yes	Yes	Yes	No	No	Yes	No											26	Girl	Aunt		I don't know		I don't know		No						24 to 35 months	>= 35 years				No	No
28	36	Male	Guadian	Unmarried	Others	Retailer	Between 60.001 and 100.000FCFA	University	Elig-Effa	MELEN 3	Yes	Yes	Yes	Yes	No	No	No											26	Boy	Mother		I don't know		I don't know		No						24 to 35 months	>= 35 years				No	No
29	32	Female	Parent	Unmarried	Others		less than 60.000FCFA	Secondary	Elig-Effa	MELEN 3	Yes	Yes	No	No	No	Yes	No											25	Boy	Mother		Yes	9	Yes	15	Yes	2022-02-08	2022-11-24	2023-05-23	9	15	24 to 35 months	25 to 34 years	No	No	No	No	No
30	19	Female	Parent	Unmarried	Others		I don't know	Secondary	Elig-Effa	MELEN 3	Yes	Yes	Yes	Yes	No	Yes	No											16	Boy	Aunt		I don't know		I don't know		No						12 to 23 months	<= 24 years				No	No
31	26	Female	Parent	Unmarried	Others		Between 100.001 and 300.000FCFA	University	Elig-Effa	MELEN 3	Yes	Yes	Yes	Yes	Yes	Yes	No											17	Boy	Mother		Yes	9	Yes	15	Yes	2022-10-17	2023-07-17	2024-02-19	9	16	12 to 23 months	25 to 34 years	No	No	No	No	No
32	22	Female	Parent	Unmarried	Others		I don't know	Secondary	Elig-Effa	MELEN 3	Yes	Yes	Yes	No	No	No	No											22	Boy	Mother		Yes	11	Yes	16	Yes	2021-05-17	2022-04-18	2022-12-26	11	19	12 to 23 months	<= 24 years	Yes	Yes	Yes	No	Yes
33	30	Female	Guadian	Unmarried	Housekeeper		less than 60.000FCFA	Secondary	Elig-Effa	MELEN 3	No	No							No	Yes	Yes	Yes	No	No	No	No		24	Boy	Others		No										24 to 35 months	25 to 34 years				Yes	Yes
34	28	Female	Parent	Unmarried	Housekeeper		less than 60.000FCFA	Secondary	Elig-Effa	MELEN 3	Yes	Yes	Yes	No	No	Yes	No											24	Boy	Mother		Yes	9	Yes	15	Yes	2022-03-03	2022-12-22	2023-06-26	9	15	24 to 35 months	25 to 34 years	No	No	No	No	No
35	48	Female	Guadian	Married	Housekeeper		I don't know	Secondary	Elig-Effa	ELIG-EFFA III	Yes	Yes	Yes	No	No	No	No											25	Girl	Mother		Yes	9	Yes	15	No						24 to 35 months	>= 35 years				No	No
36	45	Female	Parent	Unmarried	Others		less than 60.000FCFA	Secondary	Elig-Effa	ELIG-EFFA III	Yes	Yes	Yes	Yes	No	Yes	No											28	Boy	Others	menagere	No										24 to 35 months	>= 35 years				No	No
37	26	Female	Parent	Unmarried	Housekeeper		less than 60.000FCFA	Secondary	Elig-Effa	ELIG-EFFA III	No	No							Yes	Yes	Yes	Yes	No	Yes	No	No		14	Girl	Mother		No										12 to 23 months	25 to 34 years				Yes	Yes
38	53	Female	Guadian	Unmarried	Others		Between 60.001 and 100.000FCFA	Secondary	Elig-Effa	ELIG-EFFA III	Yes	Yes	Yes	No	No	No	No											14	Boy	Mother		Yes	9	No		Yes	2023-01-30	2023-11-08		9		12 to 23 months	>= 35 years	No		No	No	No
39	47	Male	Parent	Married	Housekeeper		less than 60.000FCFA	Secondary	Elig-Effa	ELIG-EFFA III	Yes	Yes	Yes	Yes	No	No	No											33	Boy	Mother		No										24 to 35 months	>= 35 years				No	No
40	35	Female	Parent	Unmarried	Others		less than 60.000FCFA	University	Elig-Effa	ELIG-EFFA III	No	No							No	No	No	No	No	No	No	Yes	JE NE CONNAIS PAS CA	30	Girl	Father		I don't know		I don't know		No						24 to 35 months	>= 35 years				Yes	Yes
41	33	Female	Parent	Unmarried	Others		less than 60.000FCFA	Secondary	Elig-Effa	ELIG-EFFA III	Yes	Yes	Yes	No	No	No	No											28	Girl	Mother		Yes	9	Yes	16	No						24 to 35 months	25 to 34 years				No	No
42	25	Female	Parent	Unmarried	Housekeeper		less than 60.000FCFA	Secondary	Elig-Effa	ELIG-EFFA III	Yes	Yes	Yes	Yes	No	Yes	No											29	Girl	Mother		Yes	9	Yes	15	Yes	2021-10-13	2022-07-26	2023-02-28	9	16	24 to 35 months	25 to 34 years	No	No	No	No	No
43	38	Female	Parent	Unmarried	Others		Between 60.001 and 100.000FCFA	Secondary	Elig-Effa	ELIG-EFFA 2	Yes	Yes	No	No	Yes	No	No											12	Boy	Mother		No										12 to 23 months	>= 35 years				No	No
44	28	Female	Parent	Unmarried	Housekeeper		less than 60.000FCFA	Secondary	Elig-Effa	ELIG-EFFA 2	Yes	Yes	Yes	No	Yes	Yes	No											29	Girl	Mother		Yes	9	Yes	18	Yes	2021-10-20	2022-07-28	2023-01-24	9	15	24 to 35 months	25 to 34 years	No	No	No	No	No
45	45	Female	Parent	Married	Others		Between 100.001 and 300.000FCFA	University	Elig-Effa	ELIG-EFFA 2	Yes	Yes	Yes	No	No	Yes	No											24	Girl	Mother		Yes	9	Yes	15	No						24 to 35 months	>= 35 years				No	No
46	55	Female	Guadian	Married	Others		Between 100.001 and 300.000FCFA	Secondary	Elig-Effa	ELIG-EFFA 2	Yes	Yes	No	No	Yes	Yes	No											29	Girl	Sister		I don't know		I don't know		No						24 to 35 months	>= 35 years				No	No
47	37	Female	Parent	Unmarried	Others		Between 60.001 and 100.000FCFA	Secondary	Elig-Effa	ELIG-EFFA 2	No	No							Yes	No	No	Yes	No	No	No	No		28	Girl	Mother		Yes	9	Yes	15	Yes	2021-11-12	2022-08-19	2024-01-22	9	26	24 to 35 months	>= 35 years	No	Yes	Yes	Yes	Yes
48	29	Male	Parent	Unmarried	Housekeeper		less than 60.000FCFA	Primary	Elig-Effa	ELIG-EFFA 2	Yes	Yes	Yes	No	No	No	No											14	Girl	Mother		Yes	9	No		Yes	2023-01-17	2023-11-17		10		12 to 23 months	25 to 34 years	Yes		Yes	No	Yes
49	36	Female	Parent	Married	Others		Between 100.001 and 300.000FCFA	University	Elig-Effa	MELEN 1	Yes	Yes	Yes	No	No	Yes	No											12	Girl	Mother		Yes	9	No		Yes	2023-03-07	2023-12-22		9		12 to 23 months	>= 35 years	No		No	No	No
50	40	Male	Guadian	Married	Others		Between 100.001 and 300.000FCFA	University	Elig-Effa	ELIG-EFFA 2	Yes	Yes	No	No	Yes	No	No											20	Girl	Mother		Yes	9	Yes	15	Yes	2022-04-07	2023-01-10	2023-08-04	9	15	12 to 23 months	>= 35 years	No	No	No	No	No
51	30	Female	Parent	Unmarried	Housekeeper		less than 60.000FCFA	Secondary	Elig-Effa	ELIG-EFFA 2	Yes	Yes	Yes	No	No	No	No											33	Boy	Mother		Yes	9	Yes	15	Yes	2021-05-12	2022-02-24	2022-08-26	9	15	24 to 35 months	25 to 34 years	No	No	No	No	No
52	31	Female	Parent	Unmarried	Others		Between 60.001 and 100.000FCFA	University	Elig-Effa	ELIG-EFFA III	Yes	Yes	Yes	No	No	No	No											26	Boy	Mother		Yes	9	Yes	15	Yes	2021-11-18	2022-08-26	2023-02-24	9	15	24 to 35 months	25 to 34 years	No	No	No	No	No
53	34	Female	Parent	Unmarried	Others		Between 60.001 and 100.000FCFA	University	Elig-Effa	MELEN 3	Yes	Yes	Yes	No	No	No	No											24	Boy	Mother		Yes	9	Yes	15	Yes	2022-03-03	2022-12-22	2023-06-26	9	15	24 to 35 months	25 to 34 years	No	No	No	No	No
54	41	Female	Parent	Married	Others		Between 60.001 and 100.000FCFA	Secondary	Elig-Effa	MELEN 1	Yes	Yes	Yes	No	No	No	No											24	Girl	Mother		Yes	9	Yes	15	Yes	2022-03-03	2022-12-22	2023-06-26	9	15	24 to 35 months	>= 35 years	No	No	No	No	No
55	34	Female	Parent	Unmarried	Others		Between 60.001 and 100.000FCFA	University	Elig-Effa	MELEN 1	Yes	Yes	Yes	No	No	No	No											34	Boy	Mother		Yes	9	Yes	15	Yes	2021-04-16	2022-01-24	2022-07-25	9	15	24 to 35 months	25 to 34 years	No	No	No	No	No
56	33	Female	Parent	Unmarried	Housekeeper		less than 60.000FCFA	Secondary	Elig-Effa	MELEN IV	Yes	Yes	Yes	No	No	No	No											35	Girl	Mother		Yes	9	Yes	16	Yes	2021-03-14	2021-12-24	2022-07-22	9	16	24 to 35 months	25 to 34 years	No	No	No	No	No
57	28	Female	Parent	Unmarried	Others		Between 60.001 and 100.000FCFA	Secondary	Elig-Effa	ELIG-EFFA IV	Yes	Yes	Yes	No	No	No	No											35	Girl	Mother		I don't know		I don't know		No						24 to 35 months	25 to 34 years				No	No
58	28	Female	Parent	Unmarried	Others		less than 60.000FCFA	Secondary	Elig-Effa	ELIG-EFFA 2	Yes	Yes	Yes	No	No	No	No											29	Girl	Sister		Yes	9	Yes	15	No						24 to 35 months	25 to 34 years				No	No
59	25	Female	Parent	Unmarried	Others		less than 60.000FCFA	University	Elig-Effa	ELIG-EFFA 2	Yes	Yes	Yes	No	Yes	Yes	No											24	Girl	Mother		Yes	9	Yes	15	Yes	2022-03-20	2022-12-23	2023-06-23	9	15	24 to 35 months	25 to 34 years	No	No	No	No	No
60	41	Female	Guadian	Unmarried	Others		less than 60.000FCFA	Secondary	Elig-Effa	ELIG-EFFA 2	Yes	Yes	No	No	No	Yes	No											22	Boy	Mother		I don't know		I don't know		No						12 to 23 months	>= 35 years				No	No
61	63	Male	Guadian	Unmarried	Others		I don't know	Primary	Elig-Effa	MELEN 3	No	No							Yes	No	No	No	No	No	No	No		25	Girl	Mother		I don't know		I don't know		No						24 to 35 months	>= 35 years				Yes	Yes
62	31	Female	Parent	Married	Others		Between 100.001 and 300.000FCFA	Secondary	Elig-Effa	ELIG-EFFA 2	Yes	Yes	Yes	No	No	No	No											17	Boy	Mother		Yes	9	No		Yes	2022-10-13	2023-07-28		9		12 to 23 months	25 to 34 years	No		No	No	No
63	42	Female	Parent	Unmarried	Others		Between 60.001 and 100.000FCFA	University	Elig-Effa	MELEN IV	Yes	Yes	Yes	No	No	No	No											24	Girl	Mother		Yes	9	I don't know		No						24 to 35 months	>= 35 years				No	No
64	27	Male	Parent	Unmarried	Others	Car mechanic	less than 60.000FCFA	Secondary	Elig-Effa	MELEN IV	Yes	Yes	Yes	No	No	No	No											34	Girl	Mother		Yes	9	Yes	15	No						24 to 35 months	25 to 34 years				No	No
65	50	Male	Parent	Unmarried	Others		Between 100.001 and 300.000FCFA	University	Elig-Effa	MELEN IV	Yes	Yes	Yes	No	No	No	No											32	Girl	Mother		Yes	11	I don't know		Yes	2021-07-16	2022-06-17	2023-01-06	11	17	24 to 35 months	>= 35 years	Yes	No	Yes	No	Yes
66	24	Female	Parent	Unmarried	Others		Between 60.001 and 100.000FCFA	University	Elig-Effa	MELEN IV	Yes	Yes	Yes	No	No	No	No											29	Girl	Mother		Yes	9	Yes	15	No						24 to 35 months	<= 24 years				No	No
67	44	Female	Guadian	Married	Others		Between 100.001 and 300.000FCFA	University	Elig-Effa	ELIG-EFFA III	Yes	Yes	Yes	No	Yes	Yes	No											25	Girl	Aunt		I don't know		I don't know		No						24 to 35 months	>= 35 years				No	No
68	39	Male	Parent	Unmarried	Others		Between 60.001 and 100.000FCFA	Secondary	Elig-Effa	MELEN 1	Yes	Yes	Yes	No	Yes	Yes	No											27	Girl	Father		Yes	9	Yes	15	Yes	2021-11-10	2022-08-24	2023-04-21	9	17	24 to 35 months	>= 35 years	No	No	No	No	No
69	61	Female	Guadian	Unmarried	Housekeeper		Between 60.001 and 100.000FCFA	Secondary	Elig-Effa	ELIG-EFFA 2	No	No							Yes	No	No	No	No	No	No	No		25	Girl	Mother		I don't know		I don't know		No						24 to 35 months	>= 35 years				Yes	Yes
70	27	Female	Parent	Unmarried	Housekeeper		less than 60.000FCFA	Secondary	Elig-Effa	ELIG-EFFA 2	Yes	Yes	Yes	No	No	No	No											24	Girl	Mother		Yes	9	No		Yes	2022-03-20	2022-12-23		9		24 to 35 months	25 to 34 years	No		No	No	No
71	39	Female	Parent	Unmarried	Others		less than 60.000FCFA	Secondary	Elig-Effa	ELIG-EFFA 7	Yes	Yes	Yes	No	No	Yes	No											33	Boy	Mother		Yes	9	Yes	15	No						24 to 35 months	>= 35 years				No	No
72	37	Female	Parent	Married	Others		Between 100.001 and 300.000FCFA	University	Elig-Effa	ELIG-EFFA 7	Yes	Yes	Yes	No	Yes	Yes	No											31	Girl	Aunt		Yes	9	Yes	15	No						24 to 35 months	>= 35 years				No	No
73	31	Female	Parent	Unmarried	Others		less than 60.000FCFA	Secondary	Elig-Effa	ELIG-EFFA 2	Yes	Yes	No	No	Yes	Yes	No											29	Girl	Mother		Yes	9	Yes	15	Yes	2021-09-12	2022-07-08	2023-04-07	9	18	24 to 35 months	25 to 34 years	No	No	No	No	No
74	56	Female	Guadian	Married	Others		Between 100.001 and 300.000FCFA	Secondary	Elig-Effa	ELIG-EFFA 7	Yes	Yes	Yes	No	No	No	No											26	Girl	Mother		Yes	9	Yes	15	No						24 to 35 months	>= 35 years				No	No
75	51	Female	Guadian	Married	Others		Between 100.001 and 300.000FCFA	University	Elig-Effa	MELEN 1	Yes	Yes	Yes	No	No	Yes	No											24	Girl	Mother		Yes	9	Yes	15	No						24 to 35 months	>= 35 years				No	No
76	37	Female	Guadian	Unmarried	Others		Between 60.001 and 100.000FCFA	Secondary	Elig-Effa	ELIG-EFFA 7	Yes	No							Yes	Yes	No	No	Yes	No	No	No		18	Girl	Father		Yes	0	Yes	0	No						12 to 23 months	>= 35 years				No	No
77	43	Female	Parent	Married	Others		Between 60.001 and 100.000FCFA	Secondary	Elig-Effa	ELIG-EFFA III	Yes	Yes	Yes	No	Yes	Yes	No											27	Girl	Mother		Yes	9	No		No						24 to 35 months	>= 35 years				No	No
78	56	Female	Guadian	Married	Others		Between 60.001 and 100.000FCFA	University	Elig-Effa	ELIG-EFFA III	Yes	Yes	Yes	No	Yes	Yes	No											24	Girl	Mother		Yes	9	Yes	15	Yes	2022-01-13	2022-10-18	2023-04-24	9	15	24 to 35 months	>= 35 years	No	No	No	No	No
79	39	Female	Parent	Unmarried	Others		less than 60.000FCFA	Primary	Elig-Effa	ELIG-EFFA III	Yes	Yes	Yes	No	No	No	No											30	Girl	Mother		Yes	9	Yes	15	No						24 to 35 months	>= 35 years				No	No
80	34	Female	Parent	Married	Others		Between 60.001 and 100.000FCFA	Secondary	Elig-Effa	MELEN 1	Yes	Yes	Yes	No	No	Yes	No											30	Girl	Sister		No										24 to 35 months	25 to 34 years				No	No
81	70	Female	Guadian	Unmarried	Others		I don't know	Secondary	Elig-Effa	ELIG-EFFA 2	No	No							Yes	No	No	Yes	No	No	No	No		13	Girl	Mother		I don't know		I don't know		No						12 to 23 months	>= 35 years				Yes	Yes
82	33	Male	Parent	Unmarried	Others		Between 60.001 and 100.000FCFA	Secondary	Elig-Effa	ELIG-EFFA 2	No	No							Yes	Yes	Yes	No	No	Yes	No	No		27	Girl	Mother		No										24 to 35 months	25 to 34 years				Yes	Yes
83	53	Female	Guadian	Married	Others		Between 100.001 and 300.000FCFA	University	Elig-Effa	MELEN 1	Yes	Yes	No	No	No	Yes	No											28	Boy	Mother		Yes	9	Yes	15	Yes	2021-11-10	2022-08-19	2024-03-21	9	28	24 to 35 months	>= 35 years	No	Yes	Yes	No	Yes
84	56	Female	Guadian	Unmarried	Others	Retailer	Between 100.001 and 300.000FCFA	Secondary	Elig-Effa	ELIG-EFFA 2	Yes	Yes	Yes	Yes	Yes	No	No											24	Boy	Others	Grand Mother	Yes	9	Yes	15	Yes	2022-03-23	2022-12-23	2023-06-23	9	15	24 to 35 months	>= 35 years	No	No	No	No	No
85	58	Female	Parent	Married	Others		More than 300.000FCFA	Secondary	Elig-Effa	ELIG-EFFA 2	Yes	Yes	Yes	Yes	No	Yes	No											25	Girl	Mother		Yes	9	Yes	15	No						24 to 35 months	>= 35 years				No	No
86	55	Female	Guadian	Married	Housekeeper		Between 60.001 and 100.000FCFA	Secondary	Elig-Effa	ELIG-EFFA IV	Yes	Yes	Yes	No	No	Yes	No											24	Girl	Mother		I don't know		I don't know		No						24 to 35 months	>= 35 years				No	No
87	34	Male	Parent	Unmarried	Others		less than 60.000FCFA	Secondary	Elig-Effa	ELIG-EFFA 7	Yes	Yes	Yes	No	No	No	No											28	Girl	Mother		Yes	9	Yes	15	Yes	2021-07-12	2022-04-21	2022-10-21	9	15	24 to 35 months	25 to 34 years	No	No	No	No	No
88	77	Male	Guadian	Married	Others	Retired	I don't know	University	Elig-Effa	ELIG-EFFA 2	Yes	Yes	Yes	No	No	Yes	No											30	Girl	Mother		I don't know		I don't know		No						24 to 35 months	>= 35 years				No	No
89	25	Female	Parent	Unmarried	Housekeeper		less than 60.000FCFA	Primary	Elig-Effa	MELEN IV	Yes	Yes	Yes	No	No	No	No											23	Girl	Mother		Yes	9	No		Yes	2022-04-19	2023-02-28		10		12 to 23 months	25 to 34 years	Yes		Yes	No	Yes
90	42	Female	Parent	Unmarried	Others		Between 100.001 and 300.000FCFA	Secondary	Elig-Effa	ELIG-EFFA V	No	No							Yes	No	Yes	No	No	No	No	Yes	JE N'AIME PAS LES VACCINS	13	Girl	Mother		No										12 to 23 months	>= 35 years				Yes	Yes
91	31	Female	Parent	Married	Others		Between 100.001 and 300.000FCFA	University	Elig-Effa	ELIG-EFFA V	Yes	Yes	Yes	No	No	No	No											18	Boy	Mother		Yes	10	Yes	15	Yes	2022-08-19	2023-06-23	2024-02-19	10	18	12 to 23 months	25 to 34 years	Yes	No	Yes	No	Yes
92	35	Female	Parent	Unmarried	Others		less than 60.000FCFA	Secondary	Elig-Effa	ELIG-EFFA V	Yes	Yes	Yes	No	No	No	No											14	Girl	Aunt		Yes	9	No		Yes	2022-10-20	2023-08-24		10		12 to 23 months	>= 35 years	Yes		Yes	No	Yes
93	46	Female	Parent	Married	Others		Between 100.001 and 300.000FCFA	University	Elig-Effa	ELIG-EFFA VI	Yes	Yes	Yes	No	No	No	No											12	Girl	Mother		Yes	9	No		Yes	2023-03-06	2023-12-08		9		12 to 23 months	>= 35 years	No		No	No	No
94	22	Female	Parent	Unmarried	Housekeeper		less than 60.000FCFA	Primary	Elig-Effa	MELEN IV	No	No							No	Yes	No	No	No	No	No	No		29	Girl	Mother		No										24 to 35 months	<= 24 years				Yes	Yes
95	42	Female	Guadian	Unmarried	Others		Between 60.001 and 100.000FCFA	Secondary	Elig-Effa	MELEN IV	Yes	Yes	Yes	No	No	No	No											14	Boy	Mother		Yes	9	No		Yes	2023-01-20	2023-11-27		10		12 to 23 months	>= 35 years	Yes		Yes	No	Yes
96	31	Female	Guadian	Unmarried	Others		Between 60.001 and 100.000FCFA	Secondary	Elig-Effa	ELIG-EFFA VI	Yes	Yes	Yes	No	No	No	No											12	Girl	Mother		Yes	9	No		Yes	2023-03-15	2023-12-22		9		12 to 23 months	25 to 34 years	No		No	No	No
97	32	Female	Parent	Unmarried	Others		less than 60.000FCFA	Secondary	Elig-Effa	ELIG-EFFA 7	Yes	Yes	Yes	No	No	No	No											24	Girl	Mother		Yes	9	Yes	16	No						24 to 35 months	25 to 34 years				No	No
98	63	Female	Guadian	Married	Others		More than 300.000FCFA	University	Elig-Effa	ELIG-EFFA 7	Yes	Yes	Yes	No	No	No	No											14	Girl	Mother		I don't know		I don't know		No						12 to 23 months	>= 35 years				No	No
99	44	Female	Guadian	Married	Others		Between 60.001 and 100.000FCFA	Secondary	Elig-Effa	ELIG-EFFA 7	Yes	Yes	Yes	No	No	No	No											17	Boy	Aunt		Yes	9	No		Yes	2022-09-07	2023-06-16		9		12 to 23 months	>= 35 years	No		No	No	No
100	37	Female	Guadian	Unmarried	Housekeeper		less than 60.000FCFA	Secondary	Elig-Effa	ELIG-EFFA 7	No	No							Yes	Yes	Yes	No	No	No	No	No		13	Boy	Aunt		No										12 to 23 months	>= 35 years				Yes	Yes
101	43	Female	Parent	Unmarried	Housekeeper		Between 60.001 and 100.000FCFA	Primary	Elig-Effa	ELIG-EFFA 7	Yes	Yes	Yes	No	No	No	No											14	Girl	Mother		Yes	9	No		Yes	2023-01-14	2023-11-22		10		12 to 23 months	>= 35 years	Yes		Yes	No	Yes
102	52	Female	Parent	Unmarried	Others		More than 300.000FCFA	Secondary	Elig-Effa	ELIG-EFFA VI	No	No							Yes	No	No	Yes	No	No	No	No		29	Boy	Mother		No										24 to 35 months	>= 35 years				Yes	Yes
103	40	Female	Parent	Unmarried	Others		less than 60.000FCFA	Secondary	Elig-Effa	ELIG-EFFA VI	Yes	Yes	Yes	No	No	No	No											12	Girl	Mother		Yes	9	No		Yes	2023-03-20	2023-12-22		9		12 to 23 months	>= 35 years	No		No	No	No
104	35	Female	Parent	Unmarried	Others		Between 100.001 and 300.000FCFA	University	Elig-Effa	ELIG-EFFA VI	Yes	Yes	Yes	No	No	No	No											25	Girl	Mother		Yes	9	Yes	16	No						24 to 35 months	>= 35 years				No	No
105	40	Female	Parent	Married	Housekeeper		Between 60.001 and 100.000FCFA	University	Elig-Effa	ELIG-EFFA VI	No	No							Yes	No	No	No	No	Yes	No	Yes	JE N'AIME PAS LES VACCINS LA	24	Girl	Mother		No										24 to 35 months	>= 35 years				Yes	Yes
106	33	Female	Parent	Married	Housekeeper		I don't know	Secondary	Elig-Effa	ELIG-EFFA V	Yes	Yes	Yes	No	No	No	No											22	Girl	Mother		Yes	9	Yes	15	No						12 to 23 months	25 to 34 years				No	No
107	42	Female	Parent	Married	Others		Between 100.001 and 300.000FCFA	University	Elig-Effa	ELIG-EFFA IV	No	No							Yes	Yes	Yes	No	No	No	No	No		32	Girl	Mother		No										24 to 35 months	>= 35 years				Yes	Yes
108	37	Female	Parent	Unmarried	Housekeeper		I don't know	Secondary	Elig-Effa	ELIG-EFFA V	Yes	Yes	Yes	No	No	No	No											26	Boy	Mother		No										24 to 35 months	>= 35 years				No	No
109	35	Male	Parent	Unmarried	Others		less than 60.000FCFA	Secondary	Elig-Effa	ELIG-EFFA VI	Yes	Yes	Yes	No	No	No	No											22	Boy	Mother		I don't know		I don't know		No						12 to 23 months	>= 35 years				No	No
110	33	Male	Parent	Married	Others		Between 60.001 and 100.000FCFA	Secondary	Elig-Effa	ELIG-EFFA VI	Yes	Yes	Yes	No	No	Yes	No											18	Boy	Mother		Yes	9	Yes	15	Yes	2022-10-21	2023-07-28	2024-01-26	9	15	12 to 23 months	25 to 34 years	No	No	No	No	No
111	26	Female	Parent	Unmarried	Others		less than 60.000FCFA	Secondary	Elig-Effa	ELIG-EFFA VI	Yes	Yes	Yes	No	No	No	No											25	Girl	Mother		Yes	9	Yes	15	Yes	2022-02-21	2022-11-30	2023-08-28	9	18	24 to 35 months	25 to 34 years	No	No	No	No	No
112	28	Female	Parent	Unmarried	Housekeeper		less than 60.000FCFA	Secondary	Elig-Effa	ELIG-EFFA VI	Yes	Yes	Yes	No	No	Yes	No											21	Boy	Mother		Yes	9	Yes	15	No						12 to 23 months	25 to 34 years				No	No
113	19	Female	Guadian	Unmarried	Others	Student	I don't know	University	Elig-Effa	ELIG-EFFA V	Yes	Yes	No	No	No	Yes	No											12	Boy	Sister		Yes	9	No		Yes	2023-03-17	2024-01-19		10		12 to 23 months	<= 24 years	Yes		Yes	No	Yes
114	52	Female	Guadian	Unmarried	Others		Between 100.001 and 300.000FCFA	University	Elig-Effa	ELIG-EFFA V	Yes	Yes	Yes	No	No	No	No											13	Girl	Father		Yes	9	No		No						12 to 23 months	>= 35 years				No	No
115	37	Female	Parent	Unmarried	Others		less than 60.000FCFA	Secondary	Elig-Effa	ELIG-EFFA V	No	No							Yes	No	No	Yes	No	Yes	No	No		12	Boy	Mother		No										12 to 23 months	>= 35 years				Yes	Yes
116	28	Male	Parent	Unmarried	Others		Between 100.001 and 300.000FCFA	Secondary	Elig-Effa	ELIG-EFFA V	Yes	Yes	Yes	No	No	Yes	No											12	Boy	Mother		No										12 to 23 months	25 to 34 years				No	No
117	37	Male	Guadian	Unmarried	Others		Between 100.001 and 300.000FCFA	University	Elig-Effa	ELIG-EFFA V	Yes	Yes	Yes	No	No	Yes	No											15	Boy	Mother		Yes	9	Yes	15	Yes	2022-12-06	2023-09-08	2024-03-12	9	15	12 to 23 months	>= 35 years	No	No	No	No	No
118	41	Female	Parent	Unmarried	Others		Between 60.001 and 100.000FCFA	Secondary	Elig-Effa	MELEN 1	No	No							Yes	Yes	Yes	Yes	No	No	No	No		30	Boy	Mother		No										24 to 35 months	>= 35 years				Yes	Yes
119	31	Female	Parent	Unmarried	Others		Between 60.001 and 100.000FCFA	Secondary	Elig-Effa	MELEN IV	Yes	Yes	Yes	No	No	No	No											34	Boy	Mother		No										24 to 35 months	25 to 34 years				No	No
120	59	Female	Guadian	Married	Others		Between 60.001 and 100.000FCFA	Secondary	Elig-Effa	ELIG-EFFA VI	Yes	Yes	Yes	No	No	No	No											28	Boy	Mother		Yes	9	Yes	15	No						24 to 35 months	>= 35 years				No	No
121	22	Male	Parent	Married	Others		I don't know	Secondary	Elig-Effa	ELIG-EFFA 7	Yes	Yes	Yes	No	No	Yes	No											24	Girl	Mother		Yes	9	I don't know		No						24 to 35 months	<= 24 years				No	No
122	39	Female	Parent	Unmarried	Housekeeper		less than 60.000FCFA	Secondary	Elig-Effa	ELIG-EFFA IV	Yes	Yes	Yes	No	No	No	No											16	Girl	Mother		No										12 to 23 months	>= 35 years				No	No
123	27	Female	Parent	Married	Housekeeper		Between 60.001 and 100.000FCFA	University	Biyem-Assi 2	Biyem-Assi lac	Yes	Yes	Yes	No	No	Yes	No											26	Girl	Mother		Yes	10	No		Yes	2022-02-04	2022-11-24		9		24 to 35 months	25 to 34 years	No		No	No	No
124	38	Female	Parent	Married	Others		Between 100.001 and 300.000FCFA	University	Biyem-Assi 2	Biyem-Assi lac	Yes	Yes	Yes	Yes	No	Yes	No											22	Girl	Aunt		I don't know		I don't know		No						12 to 23 months	>= 35 years				No	No
125	32	Female	Parent	Unmarried	Housekeeper		less than 60.000FCFA	Secondary	Biyem-Assi 2	Ebauda	Yes	Yes	Yes	No	No	Yes	No											32	Girl	Mother		Yes	12	No		Yes	2021-07-06	2022-07-13		12		24 to 35 months	25 to 34 years	Yes		Yes	No	Yes
126	23	Female	Parent	Unmarried	Others		Between 60.001 and 100.000FCFA	Secondary	Biyem-Assi 2	Ebauda	Yes	Yes	Yes	No	No	Yes	Yes	Ma mère me rappel tout le temps de la vacciner										20	Boy	Mother		Yes	9	Yes	15	Yes	2022-07-10	2023-04-25	2023-10-12	9	15	12 to 23 months	<= 24 years	No	No	No	No	No
127	31	Male	Parent	Married	Others		Between 60.001 and 100.000FCFA	University	Biyem-Assi 2	Bloc SOTA	No																	21	Girl	Mother		No										12 to 23 months	25 to 34 years				Yes	Yes
128	42	Female	Parent	Unmarried	Others		Between 100.001 and 300.000FCFA	University	Biyem-Assi 2	Bloc SOTA	Yes	Yes	Yes	Yes	No	Yes	No											27	Boy	Mother		Yes	9	Yes	15	Yes	2021-12-07	2022-09-10	2023-03-09	9	15	24 to 35 months	>= 35 years	No	No	No	No	No
129	28	Female	Guadian	Married	Others		Between 100.001 and 300.000FCFA	University	Biyem-Assi 2	Bloc SOTA	Yes	Yes	No	No	No	Yes	No											28	Boy	Mother		Yes	10	Yes	15	Yes	2021-11-05	2022-09-11	2023-02-05	10	15	24 to 35 months	25 to 34 years	Yes	No	Yes	No	Yes
130	33	Female	Parent	Married	Others		Between 100.001 and 300.000FCFA	University	Biyem-Assi 2	Ebauda	Yes	Yes	Yes	Yes	No	Yes	No											30	Boy	Mother		I don't know		I don't know		No						24 to 35 months	25 to 34 years				No	No
131	31	Female	Parent	Married	Others		More than 300.000FCFA	University	Biyem-Assi 2	Carrefour biyem-assi	Yes	Yes	Yes	Yes	Yes	Yes	No											31	Girl	Sister		Yes	9	Yes	15	Yes	2021-08-02	2022-07-07	2022-12-05	11	16	24 to 35 months	25 to 34 years	Yes	No	Yes	No	Yes
132	35	Female	Parent	Married	Others		Between 60.001 and 100.000FCFA	Secondary	Biyem-Assi 2	Ebauda	Yes	Yes	Yes	No	No	Yes	No											33	Boy	Mother		Yes	9	Yes	16	Yes	2021-06-08	2022-03-09	2022-10-08	9	16	24 to 35 months	>= 35 years	No	No	No	No	No
133	42	Female	Parent	Married	Others		Between 60.001 and 100.000FCFA	University	Biyem-Assi 2	Ebauda	Yes	Yes	Yes	No	No	Yes	No											22	Girl	Mother		Yes	9	Yes	15	Yes	2022-08-08	2023-05-08	2023-11-09	9	15	12 to 23 months	>= 35 years	No	No	No	No	No
134	25	Female	Guadian	Unmarried	Others		less than 60.000FCFA	Secondary	Biyem-Assi 2	Ebauda	Yes	Yes	No	No	No	Yes	No											28	Boy	Aunt		Yes	10	Yes	15	Yes	2021-11-06	2022-11-07	2023-02-08	12	15	24 to 35 months	25 to 34 years	Yes	No	Yes	No	Yes
135	29	Female	Parent	Married	Others		Between 100.001 and 300.000FCFA	University	Biyem-Assi 2	Ebauda	Yes	Yes	Yes	No	No	Yes	No											13	Boy	Mother		Yes	9	No		Yes	2023-02-17	2023-11-22		9		12 to 23 months	25 to 34 years	No		No	No	No
136	53	Female	Guadian	Married	Others		Between 100.001 and 300.000FCFA	University	Biyem-Assi 2	Bloc SOTA	Yes	Yes	Yes	No	No	Yes	No											34	Boy	Others	grand-Mother	Yes	9	Yes	15	No						24 to 35 months	>= 35 years				No	No
137	30	Female	Parent	Married	Others		Between 60.001 and 100.000FCFA	University	Biyem-Assi 2	Bloc chefferie 21	Yes	Yes	Yes	No	No	Yes	No											30	Girl	Mother		Yes	9	Yes	15	Yes	2021-09-05	2022-06-07	2022-12-08	9	15	24 to 35 months	25 to 34 years	No	No	No	No	No
138	35	Female	Parent	Unmarried	Others		Between 100.001 and 300.000FCFA	University	Biyem-Assi 2	Bloc chefferie 21	Yes	Yes	Yes	No	No	Yes	No											28	Girl	Mother		Yes	9	Yes	15	Yes	2021-11-04	2022-09-07	2023-03-08	10	16	24 to 35 months	>= 35 years	Yes	No	Yes	No	Yes
139	28	Female	Parent	Unmarried	Others		Between 60.001 and 100.000FCFA	University	Biyem-Assi 2	nage glisse	Yes	Yes	Yes	No	No	Yes	No											21	Girl	Mother		Yes	9	Yes	15	Yes	2022-08-07	2023-05-10	2023-11-12	9	15	12 to 23 months	25 to 34 years	No	No	No	No	No
140	38	Female	Parent	Married	Others		Between 60.001 and 100.000FCFA	Secondary	Biyem-Assi 2	nage glisse	Yes	Yes	Yes	No	No	Yes	No											34	Boy	Mother		Yes	9	No		Yes	2021-05-09	2022-03-18		10		24 to 35 months	>= 35 years	Yes		Yes	No	Yes
141	31	Female	Parent	Unmarried	Others		less than 60.000FCFA	University	Biyem-Assi 2	nage glisse	Yes	Yes	Yes	No	No	No	No											29	Boy	Mother		Yes	9	No		Yes	2021-10-04	2022-07-08		9		24 to 35 months	25 to 34 years	No		No	No	No
142	33	Female	Parent	Unmarried	Housekeeper		Between 60.001 and 100.000FCFA	Secondary	Biyem-Assi 2	carrefour biyem-assi	Yes	Yes	Yes	No	No	Yes	Yes	son pere a demander qu'on vaccine donc j'ai vaccin!										27	Girl	Mother		Yes	11	Yes	15	Yes	2021-12-08	2022-11-07	2023-04-11	10	16	24 to 35 months	25 to 34 years	Yes	No	Yes	No	Yes
143	33	Female	Parent	Married	Others		Between 100.001 and 300.000FCFA	University	Biyem-Assi 2	Biyem-Assi lac	Yes	Yes	Yes	No	No	Yes	No											33	Boy	Mother		Yes	9	Yes	15	Yes	2021-06-05	2022-03-21	2022-09-13	9	15	24 to 35 months	25 to 34 years	No	No	No	No	No
144	25	Female	Parent	Unmarried	Others		Between 60.001 and 100.000FCFA	University	Biyem-Assi 2	Biyem-Assi lac	Yes	Yes	Yes	No	No	Yes	No											13	Girl	Mother		Yes	9	No		Yes	2023-02-08	2023-11-14		9		12 to 23 months	25 to 34 years	No		No	No	No
145	57	Female	Parent	Unmarried	Others		less than 60.000FCFA	University	Biyem-Assi 2	Bloc chefferie 21	Yes	Yes	Yes	Yes	No	Yes	No											29	Boy	Others	grand-Mother	Yes	9	Yes	15	Yes	2021-10-06	2022-07-07	2023-01-09	9	15	24 to 35 months	>= 35 years	No	No	No	No	No
146	49	Female	Parent	Married	Others		Between 100.001 and 300.000FCFA	University	Biyem-Assi 2	Biyem-Assi lac	Yes	Yes	Yes	No	No	No	No											28	Boy	Mother		Yes	10	No		Yes	2021-11-09	2022-09-13		10		24 to 35 months	>= 35 years	Yes		Yes	No	Yes
147	27	Female	Parent	Unmarried	Housekeeper		Between 60.001 and 100.000FCFA	University	Biyem-Assi 2	Biyem-Assi lac	No										Yes	Yes						34	Girl	Others	on ne le vaccine pas	No										24 to 35 months	25 to 34 years				Yes	Yes
148	34	Female	Parent	Unmarried	Others		Between 60.001 and 100.000FCFA	Secondary	Biyem-Assi 2	Carrefour biyem-assi	Yes	Yes	Yes	No	No	Yes	No											26	Boy	Mother		Yes	9	Yes	15	Yes	2021-01-06	2022-01-05	2023-04-10	11	27	24 to 35 months	25 to 34 years	Yes	Yes	Yes	No	Yes
149	37	Male	Parent	Married	Others		Between 100.001 and 300.000FCFA	University	Biyem-Assi 2	Bloc chefferie 21	Yes	Yes	Yes	No	No	Yes	No											30	Girl	Mother		Yes	9	Yes	15	Yes	2021-09-04	2022-06-06	2022-12-07	9	15	24 to 35 months	>= 35 years	No	No	No	No	No
150	29	Female	Parent	Married	Others		More than 300.000FCFA	University	Biyem-Assi 2	Biyem-Assi lac	Yes	Yes	Yes	No	No	Yes	No											32	Boy	Mother		Yes	9	Yes	15	Yes	2021-07-09	2022-04-15	2022-10-10	9	15	24 to 35 months	25 to 34 years	No	No	No	No	No
151	35	Female	Parent	Unmarried	Housekeeper		less than 60.000FCFA	Secondary	Biyem-Assi 2	Bloc chefferie 21	Yes	Yes	Yes	No	No	Yes	No											26	Girl	Mother		Yes	9	Yes	15	Yes	2022-01-05	2022-10-07	2023-04-10	9	15	24 to 35 months	>= 35 years	No	No	No	No	No
152	31	Female	Parent	Unmarried	Housekeeper		less than 60.000FCFA	Secondary	Biyem-Assi 2	Bloc Djonou	No	No							No	No	No	Yes	No	Yes	No	No		24	Girl	Mother		No										24 to 35 months	25 to 34 years				Yes	Yes
153	25	Female	Guadian	Unmarried	Others		Between 100.001 and 300.000FCFA	University	Biyem-Assi 2	Acacias bloc 20	Yes	Yes	Yes	Yes	No	Yes	No											18	Boy	Aunt		Yes	9	I don't know		No						12 to 23 months	25 to 34 years				No	No
154	37	Female	Parent	Unmarried	Others		Between 60.001 and 100.000FCFA	University	Biyem-Assi 2	Bloc Djonou	Yes	Yes	Yes	No	No	Yes	No											24	Boy	Mother		Yes	9	Yes	15	Yes	2022-03-10	2022-12-12	2023-07-07	9	15	24 to 35 months	>= 35 years	No	No	No	No	No
155	56	Female	Guadian	Married	Housekeeper		Between 60.001 and 100.000FCFA	Secondary	Biyem-Assi 2	Bloc Djonou	Yes	Yes	Yes	Yes	No	Yes	No											14	Boy	Mother		Yes	9	No		Yes	2023-01-28	2023-11-09		9		12 to 23 months	>= 35 years	No		No	No	No
156	28	Female	Parent	Unmarried	Others		Between 60.001 and 100.000FCFA	University	Biyem-Assi 2	Acacias bloc 20	Yes	Yes	Yes	No	No	Yes	No											24	Boy	Mother		Yes	9	Yes	15	Yes	2022-03-13	2022-12-16	2023-06-30	9	15	24 to 35 months	25 to 34 years	No	No	No	No	No
157	41	Female	Parent	Unmarried	Others		Between 100.001 and 300.000FCFA	University	Biyem-Assi 2	Acacias bloc 20	Yes	Yes	Yes	No	No	Yes	No											25	Girl	Mother		Yes	10	Yes	15	Yes	2022-02-17	2022-12-09	2023-06-12	9	15	24 to 35 months	>= 35 years	No	No	No	No	No
158	32	Female	Parent	Unmarried	Others		Between 100.001 and 300.000FCFA	University	Biyem-Assi 2	Camp SIC acacias	Yes	Yes	Yes	No	No	Yes	No											26	Boy	Mother		Yes	9	Yes	15	Yes	2022-01-06	2022-10-14	2023-04-10	9	15	24 to 35 months	25 to 34 years	No	No	No	No	No
159	39	Female	Parent	Married	Others		Between 100.001 and 300.000FCFA	University	Biyem-Assi 2	Camp SIC acacias	Yes	Yes	Yes	Yes	No	Yes	No											30	Girl	Mother		Yes	9	Yes	15	Yes	2021-09-06	2022-06-17	2022-12-16	9	15	24 to 35 months	>= 35 years	No	No	No	No	No
160	29	Female	Parent	Married	Housekeeper		Between 60.001 and 100.000FCFA	Secondary	Biyem-Assi 2	Biyem-Assi lycee	No	No							No	Yes	Yes	Yes	No	No	No	No		25	Girl	Mother		No										24 to 35 months	25 to 34 years				Yes	Yes
161	37	Female	Parent	Married	Others		Between 100.001 and 300.000FCFA	University	Biyem-Assi 2	Bloc chefferie 21	Yes	Yes	Yes	No	No	Yes	No											28	Boy	Mother		Yes	9	Yes	15	Yes	2021-11-04	2022-08-10	2023-02-11	9	15	24 to 35 months	>= 35 years	No	No	No	No	No
162	23	Female	Parent	Unmarried	Others		Between 60.001 and 100.000FCFA	University	Biyem-Assi 2	Carrefour biyem-assi	No	No							No	Yes	Yes	No	No	Yes	No	No		29	Girl	Mother		No										24 to 35 months	<= 24 years				Yes	Yes
163	34	Female	Parent	Married	Others		Between 60.001 and 100.000FCFA	University	Biyem-Assi 2	nage glisse	Yes	Yes	Yes	No	No	Yes	No											20	Girl	Mother		Yes	9	Yes	15	Yes	2022-07-04	2023-04-28	2023-10-13	9	15	12 to 23 months	25 to 34 years	No	No	No	No	No
164	37	Female	Parent	Unmarried	Others	Esthetician	Between 60.001 and 100.000FCFA	University	Biyem-Assi 2	Biyem-assi ecole	No	No							Yes	Yes	Yes	No	No	No	No	No		26	Boy	Mother		No										24 to 35 months	>= 35 years				Yes	Yes
165	35	Female	Parent	Unmarried	Others		Between 60.001 and 100.000FCFA	Secondary	Biyem-Assi 2	Carrefour biyem-assi	Yes	Yes	Yes	No	No	Yes	No											22	Girl	Mother		Yes	9	No		Yes	2022-04-13	2023-01-27		9		12 to 23 months	>= 35 years	No		No	No	No
166	42	Female	Parent	Unmarried	Housekeeper		less than 60.000FCFA	Primary	Biyem-Assi 2	Bloc chefferie 21	Yes	Yes	Yes	Yes	No	Yes	No											31	Boy	Sister		Yes	11	No		Yes	2021-08-07	2022-07-15		11		24 to 35 months	>= 35 years	Yes		Yes	No	Yes
167	0	Female	Parent	Unmarried	Others	Hairdresser	less than 60.000FCFA	Secondary	Biyem-Assi 2	Camp SIC acacias	Yes	Yes	Yes	No	No	Yes	No											23	Boy	Mother		Yes	10	No		No						12 to 23 months	<= 24 years				No	No
168	34	Female	Parent	Unmarried	Others	Hairdresser	less than 60.000FCFA	Secondary	Biyem-Assi 2	Biyem-Assi lac	Yes	Yes	Yes	No	No	Yes	No											29	Girl	Mother		Yes	11	No		Yes	2021-11-04	2022-10-26		11		24 to 35 months	25 to 34 years	Yes		Yes	No	Yes
169	35	Female	Parent	Married	Others	Dressmaker	less than 60.000FCFA	Secondary	Biyem-Assi 2	Biyem-assi bloc CCA	Yes	Yes	Yes	No	No	Yes	No											26	Boy	Mother		Yes	9	No		No						24 to 35 months	>= 35 years				No	No
170	36	Female	Parent	Married	Housekeeper		less than 60.000FCFA	Secondary	Biyem-Assi 2	Biyem-assi bloc CCA	Yes	Yes	Yes	No	No	Yes	No											13	Girl	Mother		Yes	10	No		Yes	2023-01-17	2023-11-24		10		12 to 23 months	>= 35 years	Yes		Yes	No	Yes
171	34	Female	Parent	Unmarried	Others		I don't know	Secondary	Biyem-Assi 2	nage glisse	No	No							No	Yes	No	Yes	No	No	No	No		24	Girl	Mother		No										24 to 35 months	25 to 34 years				Yes	Yes
172	39	Female	Parent	Unmarried	Others	Esthetician	less than 60.000FCFA	Secondary	Biyem-Assi 2	Biyem-Assi lac	Yes	Yes	Yes	No	No	Yes	No											32	Boy	Sister		Yes	10	No		Yes	2021-06-19	2022-03-23		9		24 to 35 months	>= 35 years	No		No	No	No
173	34	Female	Guadian	Married	Others		Between 60.001 and 100.000FCFA	Secondary	Biyem-Assi 2	Biyem-Assi lycee	Yes	Yes	Yes	Yes	No	Yes	No											29	Girl	Cousine		Yes	9	No		Yes	2021-09-19	2022-06-24		9		24 to 35 months	25 to 34 years	No		No	No	No
174	43	Female	Parent	Married	Housekeeper		Between 100.001 and 300.000FCFA	University	Biyem-Assi 2	Biyem-Assi lycee	Yes	Yes	Yes	Yes	Yes	Yes	No											17	Boy	Mother		Yes	10	Yes	17	Yes	2022-09-12	2023-07-17	2024-02-27	10	17	12 to 23 months	>= 35 years	Yes	No	Yes	No	Yes
175	27	Female	Guadian	Unmarried	Others	Hostess (hotel business)	Between 60.001 and 100.000FCFA	University	Biyem-Assi 2	Biyem-Assi lycee	Yes	Yes	Yes	No	No	Yes	No											21	Boy	Sister		Yes	12	No		Yes	2022-05-16	2023-05-23		12		12 to 23 months	25 to 34 years	Yes		Yes	No	Yes
176	31	Female	Parent	Unmarried	Others		Between 60.001 and 100.000FCFA	University	Biyem-Assi 2	Biyem-Assi lycee	Yes	Yes	Yes	Yes	Yes	Yes	No											26	Boy	Aunt		Yes	11	Yes	19	Yes	2022-01-24	2022-12-13	2023-08-15	10	18	24 to 35 months	25 to 34 years	Yes	No	Yes	No	Yes
177	28	Female	Parent	Unmarried	Others		I don't know	Secondary	Biyem-Assi 2	Camp SIC acacias	Yes	Yes	Yes	Yes	Yes	Yes	No											31	Boy	Mother		Yes	9	Yes	15	Yes	2021-08-17	2022-05-24	2022-12-15	9	15	24 to 35 months	25 to 34 years	No	No	No	No	No
178	34	Female	Parent	Married	Others		less than 60.000FCFA	Secondary	Biyem-Assi 2	Biyem-assi ecole	Yes	Yes	Yes	Yes	Yes	Yes	No											25	Boy	Mother		Yes	9	Yes	15	Yes	2022-02-13	2022-11-23	2023-05-30	9	15	24 to 35 months	25 to 34 years	No	No	No	No	No
179	32	Female	Parent	Married	Others		less than 60.000FCFA	University	Biyem-Assi 2	Biyem-assi bloc CCA	Yes	Yes	Yes	Yes	No	Yes	No											25	Girl	Others	menagere	Yes	9	Yes	18	Yes	2022-02-08	2022-12-16	2023-05-16	10	15	24 to 35 months	25 to 34 years	Yes	No	Yes	No	Yes
180	30	Female	Parent	Unmarried	Housekeeper		less than 60.000FCFA	Secondary	Biyem-Assi 2	Biyem-assi bloc CCA	Yes	Yes	Yes	No	Yes	Yes	No											25	Boy	Aunt		Yes	91	Yes	15	No						24 to 35 months	25 to 34 years				No	No
181	30	Female	Parent	Married	Others		Between 100.001 and 300.000FCFA	University	Biyem-Assi 2	Bas fonds	Yes	Yes	Yes	Yes	Yes	Yes	No											17	Boy	Cousine		Yes	10	Yes	16	Yes	2022-10-07	2023-08-23	2024-02-12	10	16	12 to 23 months	25 to 34 years	Yes	No	Yes	No	Yes
182	31	Female	Parent	Married	Housekeeper		I don't know	Primary	Biyem-Assi 2	Biyem-assi ecole	Yes	Yes	Yes	No	Yes	Yes	No											26	Boy	Mother		Yes	9	Yes	15	Yes	2021-12-22	2022-10-28	2023-04-14	10	15	24 to 35 months	25 to 34 years	Yes	No	Yes	No	Yes
183	28	Female	Parent	Married	Others		less than 60.000FCFA	Secondary	Biyem-Assi 2	Bas fonds	Yes	Yes	Yes	No	Yes	Yes	No											25	Boy	Mother		Yes	9	Yes	15	Yes	2022-01-20	2022-10-25	2023-04-28	9	15	24 to 35 months	25 to 34 years	No	No	No	No	No
184	37	Female	Parent	Unmarried	Others	Retailer	Between 100.001 and 300.000FCFA	Secondary	Biyem-Assi 2	Biyem-assi ecole	Yes	Yes	Yes	Yes	Yes	Yes	No											16	Girl	Cousine		Yes	9	Yes	15	No						12 to 23 months	>= 35 years				No	No
185	29	Female	Guadian	Unmarried	Housekeeper		less than 60.000FCFA	Primary	Biyem-Assi 2	Bloc Djonou	No	No							No	Yes	No	No	No	Yes	No	No		26	Girl	Aunt		Yes	9	No		No						24 to 35 months	25 to 34 years				Yes	Yes
186	34	Female	Parent	Unmarried	Others		less than 60.000FCFA	Primary	Biyem-Assi 2	Bloc Djonou	Yes	Yes	Yes	Yes	Yes	Yes	No											13	Girl	Mother		Yes	9	No		Yes	2023-02-20	2023-11-20		9		12 to 23 months	25 to 34 years	No		No	No	No
187	39	Female	Guadian	Unmarried	Others		I don't know	Secondary	Biyem-Assi 2	Acacias bloc 20	Yes	Yes	Yes	Yes	No	Yes	No											14	Girl	Mother		Yes	10	No		Yes	2022-01-10	2022-11-23		10		12 to 23 months	>= 35 years	Yes		Yes	No	Yes
188	37	Female	Parent	Married	Others	Dressmaker	less than 60.000FCFA	Secondary	Biyem-Assi 2	Bloc Djonou	Yes	Yes	Yes	No	No	Yes	No											32	Girl	Others	menagere	Yes	11	No		Yes	2021-07-08	2022-06-21		11		24 to 35 months	>= 35 years	Yes		Yes	No	Yes
189	37	Male	Parent	Unmarried	Others		Between 100.001 and 300.000FCFA	University	Biyem-Assi 2	Acacias bloc 20	Yes	Yes	Yes	No	No	Yes	No											24	Boy	Sister		Yes	9	No		Yes	2022-03-06	2022-12-21		9		24 to 35 months	>= 35 years	No		No	No	No
190	41	Female	Parent	Unmarried	Others	Hairdresser	I don't know	Secondary	Biyem-Assi 2	Acacias bloc 20	Yes	Yes	Yes	No	No	Yes	No											20	Girl	Mother		Yes	10	No		Yes	2022-07-12	2023-05-19		10		12 to 23 months	>= 35 years	Yes		Yes	No	Yes
191	31	Female	Parent	Unmarried	Others		Between 60.001 and 100.000FCFA	Secondary	Biyem-Assi 2	Bas fonds	No	No							No	Yes	No	Yes	No	Yes	No	No		15	Girl	Mother		No										12 to 23 months	25 to 34 years				Yes	Yes
192	35	Female	Parent	Unmarried	Others	Hairdresser	I don't know	Secondary	Biyem-Assi 2	Bas fonds	Yes	Yes	Yes	No	No	Yes	No											28	Girl	Mother		Yes	11	No		No						24 to 35 months	>= 35 years				No	No
193	40	Female	Parent	Married	Others		Between 100.001 and 300.000FCFA	Secondary	Biyem-Assi 2	Bas fonds	Yes	Yes	Yes	Yes	Yes	No	No											28	Girl	Mother		Yes	12	Yes	18	Yes	2021-10-11	2022-10-19	2023-03-22	12	17	24 to 35 months	>= 35 years	Yes	No	Yes	No	Yes
194	39	Female	Parent	Unmarried	Others		Between 60.001 and 100.000FCFA	University	Biyem-Assi 2	Bas fonds	No	No							No	Yes	No	No	Yes	No	No	No		16	Girl	Cousine		No										12 to 23 months	>= 35 years				Yes	Yes
195	24	Female	Parent	Married	Others		Between 100.001 and 300.000FCFA	University	Biyem-Assi 2	Bas fonds	Yes	Yes	Yes	Yes	Yes	Yes	No											27	Girl	Others	menagere	Yes	10	Yes	18	Yes	2021-11-18	2022-09-06	2023-05-17	9	17	24 to 35 months	<= 24 years	No	No	No	No	No
196	36	Female	Parent	Married	Others		Between 60.001 and 100.000FCFA	University	Biyem-Assi 2	Bas fonds	Yes	Yes	Yes	Yes	No	Yes	No											28	Girl	Mother		Yes	10	Yes	16	Yes	2021-11-07	2022-09-16	2023-02-24	10	15	24 to 35 months	>= 35 years	Yes	No	Yes	No	Yes
197	34	Female	Parent	Unmarried	Others	Retailer	I don't know	Secondary	Biyem-Assi 2	Carrefour biyem-assi	Yes	Yes	Yes	No	No	Yes	No											25	Girl	Mother		Yes	9	No		Yes	2021-01-22	2021-10-26		9		24 to 35 months	25 to 34 years	No		No	No	No
198	0	Female	Parent	Married	Others		Between 60.001 and 100.000FCFA	University	Biyem-Assi 2	nage glisse	Yes	Yes	Yes	Yes	Yes	Yes	No											25	Boy	Others	menagere	Yes	9	No		Yes	2022-02-09	2022-11-11		9		24 to 35 months	<= 24 years	No		No	No	No
199	33	Female	Parent	Unmarried	Others	Retailer	Between 60.001 and 100.000FCFA	Secondary	Biyem-Assi 2	Carrefour biyem-assi	Yes	Yes	Yes	No	No	Yes	No											34	Boy	Mother		Yes	11	No		Yes	2021-04-17	2022-03-25		11		24 to 35 months	25 to 34 years	Yes		Yes	No	Yes
200	0	Female	Parent	Married	Housekeeper		less than 60.000FCFA	Primary	Biyem-Assi 2	Bloc chefferie 21	Yes	Yes	Yes	No	No	Yes	No											33	Girl	Mother		Yes	9	No		Yes	2021-05-27	2022-03-28		10		24 to 35 months	<= 24 years	Yes		Yes	No	Yes
201	36	Female	Parent	Married	Housekeeper		less than 60.000FCFA	Primary	Biyem-Assi 2	Acacias bloc 20	No	Yes	Yes	No	No	Yes	Yes	Mon marie exige que je vaccine										29	Girl	Mother		Yes	10	No		Yes	2021-09-10	2022-09-28		12		24 to 35 months	>= 35 years	Yes		Yes	No	Yes
202	39	Male	Parent	Married	Others		Between 60.001 and 100.000FCFA	Secondary	Biyem-Assi 2	Acacias bloc 20	Yes	Yes	Yes	Yes	No	Yes	No											32	Girl	Mother		I don't know		I don't know		No						24 to 35 months	>= 35 years				No	No
203	23	Female	Guadian	Unmarried	Others		I don't know	University	Biyem-Assi 2	Bas fonds	Yes	Yes	Yes	No	Yes	Yes	No											13	Boy	Cousine		Yes	9	No		No						12 to 23 months	<= 24 years				No	No
204	28	Female	Parent	Married	Others		Between 60.001 and 100.000FCFA	Primary	Biyem-Assi 2	Biyem-Assi lycee	Yes	Yes	Yes	Yes	Yes	No	No											29	Boy	Cousine		Yes	9	Yes	15	Yes	2021-10-02	2022-07-27	2023-01-26	9	15	24 to 35 months	25 to 34 years	No	No	No	No	No
205	36	Female	Parent	Married	Others		I don't know	Primary	Biyem-Assi 2	Biyem-Assi lycee	Yes	Yes	Yes	Yes	Yes	Yes	No											31	Girl	Mother		Yes	10	Yes	16	Yes	2021-08-09	2022-06-10	2023-01-27	10	17	24 to 35 months	>= 35 years	Yes	No	Yes	No	Yes
206	38	Female	Parent	Married	Others		Between 100.001 and 300.000FCFA	University	Biyem-Assi 2	Biyem-assi ecole	Yes	Yes	Yes	Yes	Yes	Yes	No											16	Girl	Aunt	menagere	Yes	9	No		Yes	2022-11-29	2023-09-14		9		12 to 23 months	>= 35 years	No		No	No	No
207	25	Female	Parent	Unmarried	Others		less than 60.000FCFA	University	Biyem-Assi 2	Camp SIC acacias	Yes	Yes	Yes	No	No	Yes	No											22	Girl	Mother		Yes	9	Yes	15	Yes	2022-05-07	2023-02-10	2023-08-11	9	15	12 to 23 months	25 to 34 years	No	No	No	No	No
208	28	Female	Parent	Unmarried	Housekeeper		less than 60.000FCFA	Secondary	Biyem-Assi 2	Bloc SOTA	Yes	Yes	Yes	No	No	Yes	No											23	Boy	Mother		Yes	9	Yes	15	Yes	2022-04-05	2023-01-11	2023-07-14	9	15	12 to 23 months	25 to 34 years	No	No	No	No	No
209	29	Female	Parent	Unmarried	Others		Between 60.001 and 100.000FCFA	University	Biyem-Assi 2	Bas fonds	Yes	Yes	Yes	Yes	No	Yes	No											27	Boy	Mother		Yes	9	Yes	15	No						24 to 35 months	25 to 34 years				No	No
210	25	Female	Parent	Married	Others		less than 60.000FCFA	Secondary	Simbock	VALLEY	Yes	Yes	No	No	No	Yes	No											14	Girl	Mother		Yes	9	No		Yes	2023-01-12	2023-10-16		9		12 to 23 months	25 to 34 years	No		No	No	No
211	32	Female	Parent	Married	Housekeeper		less than 60.000FCFA	Secondary	Simbock	VALLEY	Yes	Yes	No	No	No	Yes	No											14	Girl	Mother		Yes	9	No		Yes	2023-01-02	2023-10-03		9		12 to 23 months	25 to 34 years	No		No	No	No
212	28	Female	Parent	Unmarried	Others		Between 60.001 and 100.000FCFA	University	Simbock	VALLEY	Yes	Yes	No	No	Yes	No	No											20	Boy	Mother		Yes	9	No		Yes	2022-07-02	2023-04-12		9		12 to 23 months	25 to 34 years	No		No	No	No
213	33	Female	Parent	Unmarried	Others		less than 60.000FCFA	Secondary	Simbock	VALLEY	Yes	Yes	No	No	No	Yes	No											12	Girl	Mother		Yes	9	No		Yes	2023-03-10	2024-03-15		12		12 to 23 months	25 to 34 years	Yes		Yes	No	Yes
214	37	Female	Parent	Married	Others		less than 60.000FCFA	Secondary	Simbock	VALLEY	No	No							Yes	No	No	No	No	No	No	No		25	Girl	Mother		Yes	9	Yes	15	Yes	2021-11-11	2022-10-10	2023-03-10	10	15	24 to 35 months	>= 35 years	Yes	No	Yes	Yes	Yes
215	31	Female	Parent	Married	Housekeeper		less than 60.000FCFA	Secondary	Simbock	ENTREE SIMBOCK	Yes	Yes	No	No	No	Yes	No											22	Girl	Mother		Yes	6	Yes	9	No						12 to 23 months	25 to 34 years				No	No
216	29	Male	Parent	Married	Others		Between 60.001 and 100.000FCFA	University	Simbock	ENTREE SIMBOCK	Yes	Yes	No	No	No	Yes	No											18	Girl	Mother		I don't know		I don't know		No						12 to 23 months	25 to 34 years				No	No
217	42	Female	Parent	Unmarried	Others		less than 60.000FCFA	Primary	Simbock	ENTREE SIMBOCK	Yes	Yes	Yes	No	No	Yes	No											31	Girl	Mother		Yes	9	Yes	15	Yes	2021-08-04	2022-06-10	2023-02-17	10	18	24 to 35 months	>= 35 years	Yes	No	Yes	No	Yes
218	27	Female	Parent	Unmarried	Others		Between 60.001 and 100.000FCFA	University	Simbock	ENTREE SIMBOCK	Yes	Yes	Yes	No	No	Yes	No											14	Girl	Mother		Yes	9	No		No						12 to 23 months	25 to 34 years				No	No
219	26	Female	Guadian	Unmarried	Others		I don't know	University	Simbock	VALLEY	Yes	Yes	Yes	Yes	No	Yes	No											21	Girl	Mother		I don't know		I don't know		No						12 to 23 months	25 to 34 years				No	No
220	36	Female	Parent	Married	Others		less than 60.000FCFA	Secondary	Simbock	VALLEY	Yes	Yes	No	No	No	Yes	No											18	Girl	Mother		Yes	9	Yes	15	Yes	2022-09-02	2023-06-02	2023-12-08	9	15	12 to 23 months	>= 35 years	No	No	No	No	No
221	28	Female	Guadian	Unmarried	Others		I don't know	University	Simbock	SIMBOCK	Yes	Yes	No	No	No	Yes	No											28	Boy	Mother		I don't know		I don't know		No						24 to 35 months	25 to 34 years				No	No
222	41	Female	Parent	Married	Others		Between 60.001 and 100.000FCFA	University	Simbock	SIMBOCK	Yes	Yes	Yes	No	No	Yes	No											21	Girl	Mother		Yes	9	Yes	15	No						12 to 23 months	>= 35 years				No	No
223	33	Female	Parent	Unmarried	Housekeeper		less than 60.000FCFA	Primary	Simbock	ENTREE SIMBOCK	Yes	No							Yes	Yes	Yes	No	No	No	No	Yes	LE PERE N'EST PAS D'ACCORD	28	Boy	Mother		No										24 to 35 months	25 to 34 years				No	No
224	34	Male	Parent	Married	Others		Between 100.001 and 300.000FCFA	University	Simbock	CAMPS SIC	Yes	Yes	Yes	Yes	No	Yes	No											31	Girl	Father		Yes	6	Yes	9	Yes	2021-08-04	2022-05-06	2023-01-18	9	17	24 to 35 months	25 to 34 years	No	No	No	No	No
225	28	Female	Parent	Unmarried	Others		less than 60.000FCFA	Secondary	Simbock	CAMPS SIC	Yes	Yes	Yes	No	No	Yes	No											20	Girl	Father		Yes	0	Yes	0	No						12 to 23 months	25 to 34 years				No	No
226	26	Female	Guadian	Married	Housekeeper		Between 60.001 and 100.000FCFA	University	Simbock	CAMPS SIC	Yes	Yes	No	No	No	Yes	No											33	Girl	Aunt		Yes	0	No		No						24 to 35 months	25 to 34 years				No	No
227	36	Female	Parent	Married	Others		less than 60.000FCFA	Secondary	Simbock	CAMPS SIC	No	No							Yes	Yes	Yes	No	No	Yes	No	No		20	Boy	Mother		No										12 to 23 months	>= 35 years				Yes	Yes
228	33	Female	Parent	Married	Others		Between 60.001 and 100.000FCFA	Secondary	Simbock	CAMPS SIC	Yes	Yes	Yes	No	No	No	No											22	Girl	Mother		Yes	9	Yes	15	Yes	2022-05-04	2023-02-17	2023-09-22	9	16	12 to 23 months	25 to 34 years	No	No	No	No	No
229	25	Female	Guadian	Unmarried	Others		I don't know	University	Simbock	CAMPS SIC	Yes	Yes	Yes	Yes	Yes	Yes	No											26	Boy	Sister		I don't know		I don't know		No						24 to 35 months	25 to 34 years				No	No
230	29	Male	Guadian	Married	Others		Between 100.001 and 300.000FCFA	University	Simbock	CAMPS SIC	Yes	Yes	No	No	No	Yes	No											30	Girl	Mother		Yes	0	Yes	0	Yes	2021-09-23	2022-08-12	2023-01-16	10	15	24 to 35 months	25 to 34 years	Yes	No	Yes	No	Yes
231	35	Male	Parent	Unmarried	Others		Between 60.001 and 100.000FCFA	University	Simbock	CAMPS SIC	Yes	Yes	No	Yes	Yes	Yes	No											17	Boy	Mother		Yes	9	Yes	15	Yes	2022-10-21	2023-07-21	2024-02-23	9	16	12 to 23 months	>= 35 years	No	No	No	No	No
232	39	Female	Parent	Married	Others		less than 60.000FCFA	Secondary	Simbock	CAMPS SIC	Yes	Yes	Yes	No	No	No	No											12	Boy	Mother		Yes	9	No		Yes	2023-03-12	2023-12-15		9		12 to 23 months	>= 35 years	No		No	No	No
233	28	Female	Parent	Married	Others		Between 60.001 and 100.000FCFA	University	Simbock	CAMPS SIC	Yes	Yes	Yes	No	No	No	No											31	Girl	Mother		Yes	9	Yes	15	Yes	2021-08-14	2022-06-17	2022-12-09	10	15	24 to 35 months	25 to 34 years	Yes	No	Yes	No	Yes
234	51	Female	Guadian	Married	Others		Between 100.001 and 300.000FCFA	Secondary	Simbock	SIMBOCK	Yes	Yes	Yes	No	No	Yes	No											28	Girl	Mother		Yes	0	No		Yes	2021-12-31	2022-10-05		9		24 to 35 months	>= 35 years	No		No	No	No
235	38	Female	Parent	Unmarried	Housekeeper		I don't know	University	Simbock	ENTREE SIMBOCK	Yes	Yes	Yes	No	No	Yes	No											24	Boy	Mother		Yes	9	Yes	16	Yes	2022-03-10	2022-12-16	2023-07-21	9	16	24 to 35 months	>= 35 years	No	No	No	No	No
236	27	Male	Parent	Married	Others		Between 60.001 and 100.000FCFA	University	Simbock	BASE MILLITAIRE	Yes	Yes	Yes	Yes	No	Yes	No											24	Girl	Mother		Yes	0	Yes	0	Yes	2022-03-05	2022-12-08	2023-06-09	9	15	24 to 35 months	25 to 34 years	No	No	No	No	No
237	36	Female	Parent	Married	Others		Between 100.001 and 300.000FCFA	Secondary	Simbock	BASE MILLITAIRE	Yes	Yes	Yes	Yes	Yes	Yes	No											16	Girl	Mother		Yes	9	Yes	15	Yes	2022-11-17	2023-08-18	2024-02-22	9	15	12 to 23 months	>= 35 years	No	No	No	No	No
238	28	Male	Parent	Married	Others		Between 60.001 and 100.000FCFA	University	Simbock	SIMBOCK	Yes	Yes	Yes	No	No	No	No											24	Boy	Mother		I don't know		I don't know		No						24 to 35 months	25 to 34 years				No	No
239	37	Female	Parent	Unmarried	Others		Between 60.001 and 100.000FCFA	University	Simbock	BASE MILLITAIRE	No	Yes	Yes	No	No	No	Yes	MON MARI LE DEMANDE										21	Girl	Mother		I don't know		I don't know		Yes	2022-06-12	2023-04-21	2023-09-22	10	15	12 to 23 months	>= 35 years	Yes	No	Yes	No	Yes
240	26	Female	Parent	Unmarried	Others		Between 60.001 and 100.000FCFA	University	Simbock	CARREFOUR GUIZO	No	No							Yes	No	No	No	No	Yes	No	No		26	Boy	Aunt		No										24 to 35 months	25 to 34 years				Yes	Yes
241	29	Male	Guadian	Unmarried	Others		Between 60.001 and 100.000FCFA	University	Simbock	BASE MILLITAIRE	Yes	Yes	No	Yes	No	No	No											21	Girl	Mother		Yes	0	Yes	0	No						12 to 23 months	25 to 34 years				No	No
242	34	Female	Parent	Married	Others		Between 60.001 and 100.000FCFA	University	Simbock	SIMBOCK	Yes	Yes	Yes	No	No	Yes	No											15	Boy	Aunt		I don't know		No		Yes	2022-12-18	2023-09-22		9		12 to 23 months	25 to 34 years	No		No	No	No
243	27	Male	Parent	Unmarried	Others		Between 100.001 and 300.000FCFA	University	Simbock	BASE MILLITAIRE	Yes	Yes	Yes	No	No	No	No											19	Boy	Father		I don't know		I don't know		Yes	2022-08-21	2023-06-23	2023-12-26	10	16	12 to 23 months	25 to 34 years	Yes	No	Yes	No	Yes
244	53	Female	Guadian	Married	Others		Between 100.001 and 300.000FCFA	University	Simbock	SIMBOCK	Yes	Yes	Yes	Yes	No	Yes	No											27	Boy	Others	grand Mother	Yes	9	Yes	15	Yes	2021-12-27	2022-10-07	2023-04-10	9	15	24 to 35 months	>= 35 years	No	No	No	No	No
245	40	Female	Parent	Married	Others		Between 100.001 and 300.000FCFA	University	Simbock	CAMPS SIC	No	No							Yes	Yes	Yes	Yes	No	No	No	No		16	Girl	Mother		No										12 to 23 months	>= 35 years				Yes	Yes
246	37	Female	Parent	Unmarried	Others		less than 60.000FCFA	Secondary	Simbock	BASE MILLITAIRE	Yes	No							Yes	Yes	Yes	No	No	Yes	No	No		24	Girl	Mother		No										24 to 35 months	>= 35 years				No	No
247	32	Male	Parent	Unmarried	Others		Between 60.001 and 100.000FCFA	Secondary	Simbock	VALLEY	Yes	Yes	No	No	Yes	No	No											28	Girl	Aunt		Yes	9	Yes	15	No						24 to 35 months	25 to 34 years				No	No
248	39	Female	Parent	Married	Others		less than 60.000FCFA	Secondary	Simbock	VALLEY	Yes	Yes	Yes	No	No	No	No											12	Girl	Mother		Yes	0	No		Yes	2023-03-13	2023-12-15		9		12 to 23 months	>= 35 years	No		No	No	No
249	35	Male	Parent	Unmarried	Others		Between 60.001 and 100.000FCFA	Primary	Simbock	VALLEY	No	No							No	Yes	No	No	No	No	No	No		20	Boy	Father		No										12 to 23 months	>= 35 years				Yes	Yes
250	31	Female	Parent	Unmarried	Others		Between 100.001 and 300.000FCFA	Secondary	Simbock	ENTREE SIMBOCK	Yes	Yes	No	No	No	Yes	No											27	Girl	Mother		I don't know		I don't know		Yes	2021-12-12	2022-09-16	2023-03-17	9	15	24 to 35 months	25 to 34 years	No	No	No	No	No
251	37	Female	Parent	Married	Others		I don't know	Primary	Simbock	ENTREE SIMBOCK	No	No							Yes	Yes	Yes	Yes	No	Yes	No	No		13	Girl	Mother		No										12 to 23 months	>= 35 years				Yes	Yes
252	31	Female	Parent	Married	Others		Between 60.001 and 100.000FCFA	University	Simbock	ENTREE SIMBOCK	Yes	Yes	No	No	Yes	No	No											20	Girl	Mother		Yes	9	Yes	15	No						12 to 23 months	25 to 34 years				No	No
253	36	Male	Parent	Married	Others		less than 60.000FCFA	Primary	Simbock	ENTREE SIMBOCK	Yes	Yes	No	No	Yes	No	No											16	Boy	Mother		Yes	9	No		Yes	2022-11-06	2023-09-22		10		12 to 23 months	>= 35 years	Yes		Yes	No	Yes
254	43	Female	Parent	Married	Others		Between 100.001 and 300.000FCFA	University	Simbock	ENTREE SIMBOCK	No	No							Yes	Yes	Yes	No	No	Yes	No	No		22	Girl	Mother		No										12 to 23 months	>= 35 years				Yes	Yes
255	56	Female	Guadian	Married	Others		Between 100.001 and 300.000FCFA	University	Simbock	SIMBOCK	Yes	Yes	Yes	No	No	No	No											33	Boy	Mother		Yes	0	Yes	0	No						24 to 35 months	>= 35 years				No	No
256	28	Female	Parent	Unmarried	Housekeeper		less than 60.000FCFA	Primary	Simbock	SIMBOCK	Yes	Yes	Yes	No	Yes	No	No											25	Boy	Aunt		Yes	9	Yes	15	Yes	2022-02-10	2022-11-21	2023-06-02	9	15	24 to 35 months	25 to 34 years	No	No	No	No	No
257	40	Male	Parent	Unmarried	Others		Between 60.001 and 100.000FCFA	University	Simbock	SIMBOCK	Yes	Yes	Yes	No	No	Yes	No											18	Girl	Mother		Yes	9	No		Yes	2022-09-10	2023-06-19		9		12 to 23 months	>= 35 years	No		No	No	No
258	26	Female	Parent	Married	Housekeeper		less than 60.000FCFA	Secondary	Simbock	SIMBOCK	Yes	Yes	Yes	No	No	No	No											12	Boy	Mother		Yes	9	No		Yes	2023-03-10	2024-03-22		12		12 to 23 months	25 to 34 years	Yes		Yes	No	Yes
259	42	Male	Parent	Unmarried	Others		Between 60.001 and 100.000FCFA	University	Simbock	CARREFOUR GUIZO	Yes	Yes	Yes	No	No	Yes	No											19	Boy	Sister		I don't know		I don't know		Yes	2022-08-17	2023-06-09	2023-12-19	9	16	12 to 23 months	>= 35 years	No	No	No	No	No
260	27	Female	Parent	Unmarried	Others		Between 60.001 and 100.000FCFA	Secondary	Simbock	CARREFOUR GUIZO	Yes	Yes	Yes	No	No	Yes	No											17	Girl	Mother		Yes	0	Yes	0	Yes	2022-11-10	2023-08-11	2024-02-23	9	15	12 to 23 months	25 to 34 years	No	No	No	No	No
261	30	Male	Parent	Unmarried	Others		Between 60.001 and 100.000FCFA	University	Simbock	CARREFOUR GUIZO	No	No							No	Yes	No	No	No	No	No	No		20	Boy	Sister		No										12 to 23 months	25 to 34 years				Yes	Yes
262	32	Female	Parent	Married	Others		Between 60.001 and 100.000FCFA	University	Simbock	CARREFOUR GUIZO	Yes	Yes	Yes	No	No	No	No											26	Girl	Mother		Yes	9	Yes	15	Yes	2022-01-03	2022-10-19	2023-04-21	9	15	24 to 35 months	25 to 34 years	No	No	No	No	No
263	37	Female	Guadian	Unmarried	Others		More than 300.000FCFA	University	Simbock	CARREFOUR GUIZO	No	No							No	Yes	No	No	No	No	No	No		24	Girl	Mother		No										24 to 35 months	>= 35 years				Yes	Yes
264	28	Female	Parent	Married	Others		Between 100.001 and 300.000FCFA	University	Simbock	CARREFOUR GUIZO	Yes	No							Yes	No	No	No	No	No	No	No		19	Boy	Father		No										12 to 23 months	25 to 34 years				No	No
265	39	Female	Parent	Unmarried	Others		Between 60.001 and 100.000FCFA	Secondary	Simbock	CARREFOUR GUIZO	Yes	Yes	No	No	No	Yes	No											28	Boy	Mother		Yes	0	No		Yes	2021-11-17	2022-09-16		9		24 to 35 months	>= 35 years	No		No	No	No
266	27	Male	Parent	Unmarried	Others		Between 100.001 and 300.000FCFA	University	Simbock	BASE MILLITAIRE	Yes	Yes	Yes	No	No	Yes	No											24	Boy	Father		Yes	0	Yes	0	Yes	2022-03-12	2022-12-16	2023-06-19	9	15	24 to 35 months	25 to 34 years	No	No	No	No	No
267	36	Female	Parent	Unmarried	Others		Between 60.001 and 100.000FCFA	University	Simbock	BASE MILLITAIRE	Yes	Yes	Yes	No	No	No	No											18	Boy	Mother		I don't know		I don't know		No						12 to 23 months	>= 35 years				No	No
268	40	Female	Parent	Unmarried	Others		Between 60.001 and 100.000FCFA	University	Simbock	BASE MILLITAIRE	Yes	Yes	No	No	No	Yes	No											26	Girl	Father		Yes	9	No		Yes	2022-01-24	2022-10-27		9		24 to 35 months	>= 35 years	No		No	No	No
269	41	Female	Parent	Married	Housekeeper		less than 60.000FCFA	Secondary	Simbock	BASE MILLITAIRE	Yes	Yes	No	No	No	Yes	No											20	Boy	Sister		Yes	9	Yes	15	Yes	2022-06-20	2023-04-10	2023-10-16	9	15	12 to 23 months	>= 35 years	No	No	No	No	No
270	32	Female	Parent	Married	Others		Between 60.001 and 100.000FCFA	University	Simbock	TRADEX SIMBOCK	Yes	Yes	No	No	No	Yes	No											12	Girl	Mother		Yes	9	No		Yes	2023-03-13	2023-12-19		9		12 to 23 months	25 to 34 years	No		No	No	No
271	39	Female	Parent	Married	Others		Between 100.001 and 300.000FCFA	University	Simbock	TRADEX SIMBOCK	Yes	Yes	No	No	No	Yes	No											13	Girl	Others	menagere	Yes	9	No		Yes	2023-02-10	2023-11-17		9		12 to 23 months	>= 35 years	No		No	No	No
272	28	Female	Parent	Unmarried	Others		less than 60.000FCFA	Secondary	Simbock	TRADEX SIMBOCK	Yes	Yes	No	Yes	No	No	No											28	Boy	Mother		Yes	9	No		No						24 to 35 months	25 to 34 years				No	No
273	29	Male	Guadian	Married	Others		less than 60.000FCFA	Primary	Simbock	TRADEX SIMBOCK	No	No							No	Yes	Yes	No	No	Yes	No	No		24	Boy	Mother		No										24 to 35 months	25 to 34 years				Yes	Yes
274	28	Female	Parent	Married	Others		Between 100.001 and 300.000FCFA	University	Simbock	TRADEX SIMBOCK	Yes	Yes	No	No	No	Yes	No											32	Girl	Others		Yes	9	Yes	15	No						24 to 35 months	25 to 34 years				No	No
275	26	Male	Parent	Unmarried	Others		less than 60.000FCFA	University	Simbock	TRADEX SIMBOCK	Yes	Yes	Yes	No	No	Yes	No											19	Boy	Mother		No										12 to 23 months	25 to 34 years				No	No
276	26	Female	Parent	Unmarried	Others		Between 60.001 and 100.000FCFA	University	Simbock	TRADEX SIMBOCK	Yes	Yes	No	No	No	Yes	No											12	Girl	Mother		Yes	9	No		Yes	2023-03-04	2023-12-12		9		12 to 23 months	25 to 34 years	No		No	No	No
277	32	Female	Parent	Unmarried	Others		less than 60.000FCFA	University	Simbock	TRADEX SIMBOCK	Yes	Yes	No	No	No	Yes	No											14	Girl	Mother		Yes	9	No		Yes	2023-01-12	2023-10-16		9		12 to 23 months	25 to 34 years	No		No	No	No
278	34	Male	Guadian	Unmarried	Others		less than 60.000FCFA	Secondary	Simbock	TRADEX SIMBOCK	Yes	Yes	No	Yes	No	Yes	No											18	Girl	Mother		Yes	9	No		Yes	2022-09-09	2023-07-04		9		12 to 23 months	25 to 34 years	No		No	No	No
279	29	Male	Parent	Married	Others		Between 60.001 and 100.000FCFA	Primary	Simbock	CARREFOUR GUIZO	Yes	No							Yes	Yes	Yes	No	No	No	No	No		24	Boy	Mother		No										24 to 35 months	25 to 34 years				No	No
280	41	Female	Parent	Married	Others		Between 100.001 and 300.000FCFA	University	Simbock	CARREFOUR STUDIO	Yes	Yes	No	No	Yes	Yes	No											20	Girl	Mother		Yes	9	Yes	15	Yes	2022-07-03	2023-04-06	2023-10-05	9	15	12 to 23 months	>= 35 years	No	No	No	No	No
281	36	Female	Parent	Unmarried	Housekeeper		Between 60.001 and 100.000FCFA	Primary	Simbock	CARREFOUR GUIZO	Yes	Yes	No	Yes	No	No	No											20	Girl	Mother		Yes	9	No		Yes	2022-07-07	2023-04-11		9		12 to 23 months	>= 35 years	No		No	No	No
282	28	Female	Parent	Married	Others		less than 60.000FCFA	University	Simbock	CARREFOUR GUIZO	Yes	Yes	Yes	Yes	No	No	No											15	Boy	Mother		Yes	9	No		Yes	2023-01-20	2023-10-25		9		12 to 23 months	25 to 34 years	No		No	No	No
283	27	Female	Parent	Unmarried	Others		less than 60.000FCFA	University	Simbock	CARREFOUR GUIZO	Yes	Yes	Yes	No	No	No	No											32	Girl	Mother		Yes	9	No		Yes	2021-08-24	2022-06-16		9		24 to 35 months	25 to 34 years	No		No	No	No
284	30	Female	Parent	Married	Others		Between 60.001 and 100.000FCFA	University	Simbock	CARREFOUR STUDIO	Yes	Yes	Yes	No	No	Yes	No											30	Girl	Mother		Yes	9	Yes	15	Yes	2021-10-02	2022-07-13	2023-01-20	9	15	24 to 35 months	25 to 34 years	No	No	No	No	No
285	33	Female	Parent	Unmarried	Others		I don't know	Secondary	Simbock	CARREFOUR STUDIO	No	No							Yes	Yes	Yes	No	No	Yes	No	No		23	Girl	Aunt		Yes	9	No		Yes	2022-04-28	2023-02-02		9		12 to 23 months	25 to 34 years	No		No	Yes	Yes
286	42	Female	Parent	Unmarried	Others		less than 60.000FCFA	University	Simbock	CARREFOUR GUIZO	Yes	Yes	No	No	No	Yes	No											25	Boy	Father		Yes	0	I don't know		No						24 to 35 months	>= 35 years				No	No
287	42	Female	Parent	Married	Others		Between 100.001 and 300.000FCFA	University	Simbock	CARREFOUR STUDIO	No	No							Yes	No	No	No	No	No	No	No		29	Boy	Sister		No										24 to 35 months	>= 35 years				Yes	Yes
288	26	Male	Parent	Married	Others		Between 60.001 and 100.000FCFA	University	Simbock	CARREFOUR STUDIO	Yes	Yes	Yes	Yes	No	No	No											17	Girl	Father		Yes	9	Yes	15	Yes	2022-11-06	2023-08-11	2024-02-15	9	15	12 to 23 months	25 to 34 years	No	No	No	No	No
289	33	Female	Parent	Unmarried	Housekeeper		less than 60.000FCFA	Secondary	Simbock	CARREFOUR STUDIO	Yes	Yes	Yes	No	No	No	No											14	Boy	Sister		Yes	9	No		Yes	2023-01-03	2023-10-10		9		12 to 23 months	25 to 34 years	No		No	No	No
290	27	Female	Parent	Unmarried	Others		Between 60.001 and 100.000FCFA	University	Simbock	CARREFOUR STUDIO	Yes	Yes	Yes	No	No	No	No											13	Boy	Mother		Yes	9	No		Yes	2023-02-10	2023-11-20		9		12 to 23 months	25 to 34 years	No		No	No	No
291	25	Female	Parent	Married	Others		Between 60.001 and 100.000FCFA	University	Simbock	CARREFOUR STUDIO	Yes	Yes	Yes	No	No	No	No											12	Girl	Mother		No										12 to 23 months	25 to 34 years				No	No
292	37	Female	Parent	Unmarried	Housekeeper		less than 60.000FCFA	University	Simbock	CARREFOUR STUDIO	Yes	No							Yes	Yes	Yes	No	No	No	No	No		14	Girl	Mother		No										12 to 23 months	>= 35 years				No	No
293	33	Male	Parent	Married	Others		less than 60.000FCFA	University	Simbock	CARREFOUR STUDIO	Yes	Yes	Yes	No	No	Yes	No											24	Boy	Father		I don't know		I don't know		Yes	2022-03-12	2022-12-16	2023-06-12	9	15	24 to 35 months	25 to 34 years	No	No	No	No	No
294	29	Female	Parent	Unmarried	Housekeeper		Between 60.001 and 100.000FCFA	University	Simbock	TERMINUS PETIT AFRICAIN	Yes	Yes	Yes	No	No	Yes	No											24	Girl	Mother		Yes	9	Yes	15	Yes	2022-02-20	2022-11-23	2023-05-23	9	15	24 to 35 months	25 to 34 years	No	No	No	No	No
295	32	Female	Parent	Married	Others		Between 60.001 and 100.000FCFA	None	Simbock	TERMINUS PETIT AFRICAIN	Yes	Yes	No	No	No	Yes	No											14	Girl	Mother		Yes	9	No		Yes	2022-12-09	2023-10-13		10		12 to 23 months	25 to 34 years	Yes		Yes	No	Yes
296	33	Female	Parent	Unmarried	Housekeeper		Between 60.001 and 100.000FCFA	Primary	Simbock	TERMINUS PETIT AFRICAIN	Yes	Yes	Yes	No	No	No	No											28	Girl	Mother		No										24 to 35 months	25 to 34 years				No	No
297	26	Female	Parent	Married	Others		less than 60.000FCFA	Secondary	Simbock	TERMINUS PETIT AFRICAIN	Yes	No							No	Yes	No	No	No	No	No	No		30	Girl	Mother		No										24 to 35 months	25 to 34 years				No	No
298	37	Female	Parent	Married	Others		less than 60.000FCFA	None	Simbock	TERMINUS PETIT AFRICAIN	Yes	No							No	Yes	Yes	Yes	No	No	No	No		17	Girl	Mother		No										12 to 23 months	>= 35 years				No	No
299	24	Female	Parent	Unmarried	Others		I don't know	Secondary	Simbock	TERMINUS PETIT AFRICAIN	Yes	Yes	No	No	No	Yes	No											27	Girl	Mother		Yes	9	I don't know		No						24 to 35 months	<= 24 years				No	No
300	28	Male	Parent	Married	Others		Between 100.001 and 300.000FCFA	University	Simbock	TERMINUS PETIT AFRICAIN	Yes	No							No	No	No	No	Yes	No	No	No		32	Boy	Mother		Yes	9	No		Yes	2021-07-07	2022-05-09		10		24 to 35 months	25 to 34 years	Yes		Yes	No	Yes
301	30	Male	Guadian	Unmarried	Others		less than 60.000FCFA	Secondary	Simbock	TRADEX SIMBOCK	No	No							No	Yes	Yes	No	No	No	No	No		35	Boy	Mother		I don't know		I don't know		Yes	2021-04-09	2022-01-11	2022-08-23	9	16	24 to 35 months	25 to 34 years	No	No	No	Yes	Yes
302	31	Female	Guadian	Unmarried	Others		less than 60.000FCFA	University	Simbock	TERMINUS PETIT AFRICAIN	Yes	Yes	Yes	No	No	No	No											21	Girl	Mother		I don't know		No		Yes	2022-07-20	2023-04-24		9		12 to 23 months	25 to 34 years	No		No	No	No
303	34	Female	Parent	Married	Others		Between 60.001 and 100.000FCFA	Secondary	Simbock	TERMINUS PETIT AFRICAIN	Yes	Yes	No	No	Yes	No	No											32	Boy	Mother		No										24 to 35 months	25 to 34 years				No	No
304	25	Female	Guadian	Married	Others		I don't know	None	Simbock	TERMINUS PETIT AFRICAIN	Yes	Yes	Yes	No	No	No	No											15	Girl	Mother		I don't know		I don't know		No						12 to 23 months	25 to 34 years				No	No
305	46	Female	Parent	Married	Others		Between 100.001 and 300.000FCFA	University	Simbock	TERMINUS PETIT AFRICAIN	No	No							Yes	No	Yes	No	No	Yes	No	No		24	Boy	Mother		No										24 to 35 months	>= 35 years				Yes	Yes
306	25	Female	Parent	Unmarried	Others		Between 60.001 and 100.000FCFA	None	Simbock	VALLEY	Yes	Yes	Yes	No	No	No	No											12	Girl	Mother		Yes	9	No		Yes	2023-03-12	2023-12-15		9		12 to 23 months	25 to 34 years	No		No	No	No
307	22	Female	Parent	Unmarried	Others		I don't know	Secondary	Simbock	VALLEY	Yes	Yes	Yes	No	No	No	No											24	Girl	Mother		I don't know		I don't know		Yes	2022-03-06	2022-12-12	2023-06-16	9	15	24 to 35 months	<= 24 years	No	No	No	No	No
308	30	Female	Parent	Unmarried	Others		Between 60.001 and 100.000FCFA	University	Simbock	VALLEY	Yes	Yes	No	No	No	Yes	No											30	Girl	Mother		No										24 to 35 months	25 to 34 years				No	No
309	42	Male	Parent	Married	Others		Between 100.001 and 300.000FCFA	Secondary	Simbock	VALLEY	Yes	No							Yes	Yes	Yes	No	No	Yes	No	No		25	Girl	Sister		No										24 to 35 months	>= 35 years				No	No
310	42	Female	Parent	Married	Others		Between 60.001 and 100.000FCFA	University	Biyem-Assi 1	Bas fond tam-tam	Yes	Yes	No	No	Yes	Yes	No											25	Boy	Father		Yes	9	I don't know		Yes	2022-07-03	2023-04-11	2023-10-13	9	15	24 to 35 months	>= 35 years	No	No	No	No	No
311	32	Female	Parent	Unmarried	Others		Between 60.001 and 100.000FCFA	University	Biyem-Assi 1	Bas fond tam-tam	Yes	Yes	No	No	Yes	Yes	No											12	Girl	Mother		Yes	9	No		Yes	2023-03-04	2023-12-19		9		12 to 23 months	25 to 34 years	No		No	No	No
312	27	Male	Guadian	Unmarried	Others		less than 60.000FCFA	University	Biyem-Assi 1	Bas fond tam-tam	No	No							Yes	No	Yes	No	No	No	No	No		13	Girl	Mother		No										12 to 23 months	25 to 34 years				Yes	Yes
313	27	Female	Parent	Unmarried	Others		Between 60.001 and 100.000FCFA	Secondary	Biyem-Assi 1	Bas fond tam-tam	Yes	Yes	No	No	No	Yes	No											22	Girl	Mother		No										12 to 23 months	25 to 34 years				No	No
314	29	Female	Parent	Married	Housekeeper		less than 60.000FCFA	Secondary	Biyem-Assi 1	Bas fond tam-tam	No	No							No	Yes	Yes	Yes	No	No	No	Yes	je n'adhere pas au concepte de la vaccination. le corps a de quoi se proterger lui meme, le vaccin affaibli les defenses de l'enfant	21	Boy	Mother		No										12 to 23 months	25 to 34 years				Yes	Yes
315	32	Male	Guadian	Unmarried	Others		Between 100.001 and 300.000FCFA	Secondary	Biyem-Assi 1	Bas fond tam-tam	Yes	No							Yes	Yes	Yes	No	No	Yes	No	No		29	Girl	Aunt		No										24 to 35 months	25 to 34 years				No	No
316	30	Female	Parent	Unmarried	Others		Between 60.001 and 100.000FCFA	Secondary	Biyem-Assi 1	Bas fond tam-tam	Yes	Yes	No	No	No	Yes	No											22	Boy	Mother		Yes	10	Yes	16	Yes	2022-04-13	2023-02-17	2023-08-23	10	16	12 to 23 months	25 to 34 years	Yes	No	Yes	No	Yes
317	31	Female	Parent	Married	Others		Between 60.001 and 100.000FCFA	Secondary	Biyem-Assi 1	Bas fond tam-tam	Yes	Yes	No	No	No	Yes	No											22	Boy	Mother		Yes	9	Yes	15	Yes	2022-05-19	2023-03-03	2023-09-18	9	15	12 to 23 months	25 to 34 years	No	No	No	No	No
318	30	Female	Parent	Unmarried	Housekeeper		less than 60.000FCFA	Primary	Biyem-Assi 1	parlement eto'o	Yes	Yes	No	No	No	Yes	No											29	Girl	Mother		No										24 to 35 months	25 to 34 years				No	No
319	32	Female	Guadian	Married	Others		Between 60.001 and 100.000FCFA	Primary	Biyem-Assi 1	Bloc 13	Yes	Yes	Yes	No	No	Yes	No											25	Boy	Sister		Yes	9	Yes	15	No						24 to 35 months	25 to 34 years				No	No
320	25	Female	Parent	Unmarried	Others		less than 60.000FCFA	Secondary	Biyem-Assi 1	parlement eto'o	Yes	No							Yes	Yes	Yes	No	No	Yes	No	No		27	Girl	Mother		No										24 to 35 months	25 to 34 years				No	No
321	43	Male	Guadian	Married	Others		Between 100.001 and 300.000FCFA	Secondary	Biyem-Assi 1	mont! des Sisters	Yes	Yes	Yes	Yes	No	Yes	No											34	Boy	Mother		I don't know		I don't know		No						24 to 35 months	>= 35 years				No	No
322	29	Male	Parent	Unmarried	Others		Between 60.001 and 100.000FCFA	University	Biyem-Assi 1	rue st marc	Yes	Yes	No	No	No	Yes	No											32	Girl	Father		Yes	9	No		No						24 to 35 months	25 to 34 years				No	No
323	37	Female	Parent	Married	Others		Between 100.001 and 300.000FCFA	Secondary	Biyem-Assi 1	Bloc 9	Yes	Yes	No	No	No	Yes	No											33	Boy	Mother		Yes	9	Yes	15	Yes	2021-05-04	2022-03-18	2022-10-26	10	17	24 to 35 months	>= 35 years	Yes	No	Yes	No	Yes
324	27	Female	Parent	Unmarried	Others		Between 60.001 and 100.000FCFA	Secondary	Biyem-Assi 1	Bloc 9	Yes	Yes	Yes	Yes	No	Yes	No											14	Girl	Mother		Yes	9	No		Yes	2023-01-25	2023-12-12		10		12 to 23 months	25 to 34 years	Yes		Yes	No	Yes
325	33	Female	Parent	Married	Others		Between 60.001 and 100.000FCFA	Secondary	Biyem-Assi 1	parlement eto'o	Yes	Yes	No	No	No	Yes	No											18	Boy	Father		Yes	9	No		No						12 to 23 months	25 to 34 years				No	No
326	32	Female	Parent	Unmarried	Others		less than 60.000FCFA	Secondary	Biyem-Assi 1	Bloc 24	Yes	No							Yes	Yes	Yes	No	No	Yes	No	No		13	Girl	Mother		Yes	9	No		No						12 to 23 months	25 to 34 years				No	No
327	33	Female	Parent	Unmarried	Others		less than 60.000FCFA	University	Biyem-Assi 1	Bloc 24	Yes	Yes	No	Yes	Yes	Yes	No											13	Boy	Mother		Yes	9	No		No						12 to 23 months	25 to 34 years				No	No
328	29	Female	Parent	Unmarried	Others		I don't know	University	Biyem-Assi 1	petit genie	Yes	Yes	No	No	No	Yes	No											14	Boy	Mother		Yes	9	No		No						12 to 23 months	25 to 34 years				No	No
329	39	Female	Parent	Unmarried	Others		Between 60.001 and 100.000FCFA	Secondary	Biyem-Assi 1	rond point express	Yes	Yes	No	No	No	Yes	No											17	Boy	Father		Yes	9	Yes	15	No						12 to 23 months	>= 35 years				No	No
330	35	Male	Parent	Unmarried	Others		less than 60.000FCFA	Secondary	Biyem-Assi 1	3 tombeaux	Yes	Yes	No	No	No	Yes	No											29	Girl	Mother		Yes	9	Yes	15	Yes	2021-11-23	2022-09-09	2023-03-13	9	15	24 to 35 months	>= 35 years	No	No	No	No	No
331	33	Female	Parent	Unmarried	Others		Between 60.001 and 100.000FCFA	Secondary	Biyem-Assi 1	petit genie	Yes	No							Yes	Yes	Yes	No	No	Yes	No	No		15	Girl	Mother		Yes	9	No		Yes	2022-12-02	2023-09-08		9		12 to 23 months	25 to 34 years	No		No	No	No
332	34	Female	Parent	Unmarried	Others		less than 60.000FCFA	Secondary	Biyem-Assi 1	3 tombeaux	Yes	No							Yes	Yes	Yes	No	No	Yes	No	No		22	Girl	Mother		Yes	10	Yes	15	No						12 to 23 months	25 to 34 years				No	No
333	27	Female	Parent	Married	Others		Between 100.001 and 300.000FCFA	University	Biyem-Assi 1	rond point express	Yes	Yes	Yes	Yes	No	Yes	No											19	Boy	Mother		Yes	9	Yes	15	No						12 to 23 months	25 to 34 years				No	No
334	41	Male	Guadian	Unmarried	Others		Between 60.001 and 100.000FCFA	Secondary	Biyem-Assi 1	Bloc 9	Yes	Yes	No	No	Yes	No	No											22	Boy	Brother		I don't know		I don't know		No						12 to 23 months	>= 35 years				No	No
335	39	Female	Parent	Unmarried	Housekeeper		less than 60.000FCFA	Primary	Biyem-Assi 1	mont! des Sisters	Yes	Yes	Yes	No	No	Yes	No											17	Girl	Mother		Yes	9	Yes	15	No						12 to 23 months	>= 35 years				No	No
336	30	Female	Parent	Unmarried	Others		less than 60.000FCFA	Secondary	Biyem-Assi 1	mont! des Sisters	Yes	No							Yes	Yes	Yes	No	No	Yes	No	No		32	Boy	Mother		Yes	9	Yes	17	Yes	2021-06-13	2022-05-24	2022-12-19	11	18	24 to 35 months	25 to 34 years	Yes	No	Yes	No	Yes
337	53	Male	Guadian	Unmarried	Others		Between 60.001 and 100.000FCFA	Secondary	Biyem-Assi 1	Bloc 8	Yes	Yes	No	No	Yes	Yes	No											28	Boy	Father		Yes	9	Yes	15	No						24 to 35 months	>= 35 years				No	No
338	23	Female	Parent	Unmarried	Others		I don't know	Secondary	Biyem-Assi 1	mont! des Sisters	Yes	Yes	No	No	Yes	Yes	No											13	Girl	Mother		Yes	9	No		No						12 to 23 months	<= 24 years				No	No
339	26	Female	Parent	Unmarried	Others		less than 60.000FCFA	University	Biyem-Assi 1	parlement eto'o	No	No							Yes	No	Yes	Yes	No	Yes	No	No		14	Boy	Mother		No										12 to 23 months	25 to 34 years				Yes	Yes
340	29	Female	Parent	Unmarried	Others		less than 60.000FCFA	Primary	Biyem-Assi 1	rue st marc	No	No							Yes	Yes	Yes	No	No	Yes	No	No		23	Girl	Mother		No										12 to 23 months	25 to 34 years				Yes	Yes
341	40	Male	Parent	Married	Others		Between 100.001 and 300.000FCFA	University	Biyem-Assi 1	stade de la vallee	Yes	Yes	No	No	No	Yes	No											35	Girl	Mother		I don't know		I don't know		No						24 to 35 months	>= 35 years				No	No
342	30	Female	Parent	Married	Housekeeper		less than 60.000FCFA	Primary	Biyem-Assi 1	stade de la vallee	Yes	Yes	Yes	No	No	Yes	No											33	Girl	Mother		Yes	9	Yes	15	Yes	2021-06-13	2022-05-20	2023-02-18	11	20	24 to 35 months	25 to 34 years	Yes	Yes	Yes	No	Yes
343	33	Female	Parent	Married	Others		less than 60.000FCFA	Secondary	Biyem-Assi 1	stade de la vallee	Yes	Yes	No	No	No	Yes	No											24	Girl	Mother		No										24 to 35 months	25 to 34 years				No	No
344	30	Female	Parent	Married	Housekeeper		less than 60.000FCFA	None	Biyem-Assi 1	stade de la vallee	Yes	Yes	Yes	No	No	Yes	No											15	Boy	Mother		I don't know		I don't know		No						12 to 23 months	25 to 34 years				No	No
345	35	Female	Parent	Married	Housekeeper		less than 60.000FCFA	None	Biyem-Assi 1	mont! des Sisters	Yes	Yes	Yes	Yes	No	Yes	No											31	Boy	Mother		No										24 to 35 months	>= 35 years				No	No
346	34	Female	Parent	Married	Housekeeper		less than 60.000FCFA	None	Biyem-Assi 1	parlement eto'o	Yes	Yes	Yes	No	No	Yes	No											27	Girl	Mother		Yes	0	Yes	0	No						24 to 35 months	25 to 34 years				No	No
347	27	Male	Parent	Unmarried	Others		less than 60.000FCFA	Secondary	Biyem-Assi 1	parlement eto'o	Yes	Yes	No	No	No	Yes	No											35	Girl	Aunt		Yes	1	Yes	0	Yes	2021-04-05	2022-02-08	2022-09-15	10	17	24 to 35 months	25 to 34 years	Yes	No	Yes	No	Yes
348	32	Female	Parent	Married	Housekeeper		less than 60.000FCFA	None	Biyem-Assi 1	carrefour caca	Yes	Yes	No	No	No	Yes	No											25	Boy	Mother		I don't know		I don't know		No						24 to 35 months	25 to 34 years				No	No
349	22	Female	Guadian	Married	Housekeeper		less than 60.000FCFA	Primary	Biyem-Assi 1	carrefour caca	Yes	No							Yes	No	No	No	No	Yes	No	No		15	Boy	Mother		I don't know		I don't know		No						12 to 23 months	<= 24 years				No	No
350	25	Male	Parent	Unmarried	Others		Between 60.001 and 100.000FCFA	Secondary	Biyem-Assi 1	mont! des Sisters	Yes	Yes	No	No	Yes	No	No											23	Girl	Mother		Yes	0	Yes	0	Yes	2022-04-07	2023-01-11	2023-07-14	9	15	12 to 23 months	25 to 34 years	No	No	No	No	No
351	34	Male	Parent	Unmarried	Others		Between 60.001 and 100.000FCFA	University	Biyem-Assi 1	mont! des Sisters	Yes	Yes	No	No	No	Yes	No											21	Boy	Mother		Yes	9	Yes	15	Yes	2022-01-19	2022-11-18	2023-05-19	9	16	12 to 23 months	25 to 34 years	No	No	No	No	No
352	27	Female	Guadian	Married	Others		Between 100.001 and 300.000FCFA	University	Biyem-Assi 1	mont! des Sisters	No	No							No	Yes	Yes	No	No	Yes	No	No		33	Girl	Aunt		Yes	9	Yes	15	No						24 to 35 months	25 to 34 years				Yes	Yes
353	39	Female	Parent	Married	Others		Between 100.001 and 300.000FCFA	University	Biyem-Assi 1	rue st marc	Yes	Yes	No	No	No	Yes	No											23	Boy	Cousine		Yes	9	Yes	15	Yes	2022-03-02	2023-01-06	2023-10-04	10	19	12 to 23 months	>= 35 years	Yes	Yes	Yes	No	Yes
354	36	Female	Guadian	Married	Others		Between 60.001 and 100.000FCFA	Secondary	Biyem-Assi 1	rue st marc	Yes	Yes	Yes	Yes	No	Yes	No											31	Girl	Mother		Yes	9	Yes	15	No						24 to 35 months	>= 35 years				No	No
355	29	Female	Parent	Unmarried	Others		Between 60.001 and 100.000FCFA	Primary	Biyem-Assi 1	Bloc 9	Yes	Yes	No	No	Yes	No	No											34	Girl	Mother		Yes	9	Yes	15	No						24 to 35 months	25 to 34 years				No	No
356	43	Female	Guadian	Unmarried	Others		Between 100.001 and 300.000FCFA	Secondary	Biyem-Assi 1	Bloc 24	Yes	Yes	No	No	No	Yes	No											14	Boy	Uncle		Yes	9	Yes	15	No						12 to 23 months	>= 35 years				No	No
357	28	Female	Parent	Unmarried	Others		Between 60.001 and 100.000FCFA	Secondary	Biyem-Assi 1	petit genie	Yes	Yes	Yes	No	No	Yes	No											35	Boy	Mother		Yes	9	Yes	15	Yes	2021-04-08	2022-03-17	2022-09-07	11	16	24 to 35 months	25 to 34 years	Yes	No	Yes	No	Yes
358	32	Male	Parent	Married	Others		Between 60.001 and 100.000FCFA	University	Biyem-Assi 1	Bloc 13	No	Yes	Yes	No	No	No	Yes	parce que leur mere insiste beaucoup a ce sujet										16	Boy	Mother		I don't know		I don't know		No						12 to 23 months	25 to 34 years				No	No
359	32	Female	Guadian	Unmarried	Others		less than 60.000FCFA	University	Biyem-Assi 1	stade de la vallee	Yes	Yes	No	No	No	Yes	No											23	Girl	Cousine		Yes	9	Yes	15	Yes	2022-06-29	2023-04-14	2023-10-04	9	15	12 to 23 months	25 to 34 years	No	No	No	No	No
360	34	Female	Parent	Married	Others		Between 60.001 and 100.000FCFA	University	Biyem-Assi 1	stade de la vallee	Yes	Yes	No	No	Yes	No	No											12	Boy	Mother		Yes	10	No		Yes	2023-03-16	2023-12-20		9		12 to 23 months	25 to 34 years	No		No	No	No
361	29	Male	Guadian	Unmarried	Others		More than 300.000FCFA	Secondary	Biyem-Assi 1	3 tombeaux	Yes	Yes	Yes	No	No	No	No											25	Girl	Mother		Yes	0	I don't know		No						24 to 35 months	25 to 34 years				No	No
362	21	Male	Guadian	Unmarried	Others	Retailer	Between 60.001 and 100.000FCFA	University	Biyem-Assi 1	Bloc 13	No	No							No	Yes	Yes	Yes	No	No	No	No		22	Girl	Mother		No										12 to 23 months	<= 24 years				Yes	Yes
363	36	Female	Parent	Married	Others		Between 60.001 and 100.000FCFA	University	Biyem-Assi 1	Bloc 15	Yes	Yes	No	No	No	Yes	No											35	Girl	Aunt		Yes	9	No		No						24 to 35 months	>= 35 years				No	No
364	22	Female	Parent	Unmarried	Others		less than 60.000FCFA	Secondary	Biyem-Assi 1	Bloc 15	No	No							Yes	No	No	No	No	No	No	No		27	Boy	Mother		No										24 to 35 months	<= 24 years				Yes	Yes
365	28	Female	Guadian	Unmarried	Others		Between 60.001 and 100.000FCFA	University	Biyem-Assi 1	Bloc 15	No	No							No	Yes	No	No	No	No	No	No		26	Boy	Cousine		No										24 to 35 months	25 to 34 years				Yes	Yes
366	44	Female	Parent	Married	Others		less than 60.000FCFA	University	Biyem-Assi 1	Bloc 15	Yes	Yes	Yes	No	No	Yes	No											32	Boy	Uncle		Yes	9	Yes	15	No						24 to 35 months	>= 35 years				No	No
367	38	Male	Parent	Married	Others		Between 100.001 and 300.000FCFA	University	Biyem-Assi 1	rond point express	Yes	Yes	No	No	Yes	No	No											15	Girl	Mother		Yes	9	No		Yes	2022-12-07	2023-10-13		10		12 to 23 months	>= 35 years	Yes		Yes	No	Yes
368	30	Male	Parent	Married	Others		Between 60.001 and 100.000FCFA	University	Biyem-Assi 1	rond point express	Yes	Yes	Yes	No	No	Yes	No											12	Girl	Mother		Yes	9	No		No						12 to 23 months	25 to 34 years				No	No
369	30	Female	Parent	Married	Housekeeper		less than 60.000FCFA	Primary	Biyem-Assi 1	Bloc 14	Yes	Yes	No	No	Yes	Yes	No											13	Girl	Mother		Yes	9	No		Yes	2023-02-08	2023-11-13		9		12 to 23 months	25 to 34 years	No		No	No	No
370	38	Female	Parent	Married	Others		I don't know	Secondary	Biyem-Assi 1	Bloc 14	Yes	Yes	Yes	No	Yes	Yes	No											14	Girl	Uncle		Yes	10	No		Yes	2023-01-02	2023-10-17		9		12 to 23 months	>= 35 years	No		No	No	No
371	30	Female	Parent	Married	Housekeeper		Between 60.001 and 100.000FCFA	Secondary	Biyem-Assi 1	Bloc 14	Yes	Yes	No	No	No	Yes	No											28	Girl	Aunt		Yes	10	Yes	17	Yes	2021-11-11	2022-09-19	2023-04-17	10	17	24 to 35 months	25 to 34 years	Yes	No	Yes	No	Yes
372	36	Male	Guadian	Unmarried	Others		Between 100.001 and 300.000FCFA	Secondary	Biyem-Assi 1	Bloc 14	Yes	Yes	Yes	No	No	No	No											30	Boy	Mother		I don't know		I don't know		No						24 to 35 months	>= 35 years				No	No
373	33	Female	Parent	Married	Housekeeper		Between 60.001 and 100.000FCFA	Secondary	Biyem-Assi 1	3 tombeaux	Yes	Yes	No	No	No	Yes	No											24	Girl	Mother		Yes	9	Yes	15	Yes	2022-03-13	2022-12-16	2023-06-16	9	15	24 to 35 months	25 to 34 years	No	No	No	No	No
374	39	Male	Parent	Unmarried	Others		Between 100.001 and 300.000FCFA	University	Biyem-Assi 1	Bloc 8	Yes	Yes	No	No	No	Yes	No											17	Girl	Mother		Yes	10	Yes	16	Yes	2022-10-01	2023-08-10	2024-02-08	10	16	12 to 23 months	>= 35 years	Yes	No	Yes	No	Yes
375	29	Female	Parent	Married	Others		Between 60.001 and 100.000FCFA	Secondary	Biyem-Assi 1	Bloc 8	Yes	Yes	No	Yes	No	No	No											25	Girl	Mother		Yes	9	No		Yes	2022-02-28	2022-11-30		9		24 to 35 months	25 to 34 years	No		No	No	No
376	40	Male	Parent	Unmarried	Others	Retailer	Between 100.001 and 300.000FCFA	Secondary	Biyem-Assi 1	Bloc 8	Yes	Yes	No	No	No	Yes	No											31	Girl	Mother		Yes	9	I don't know		No						24 to 35 months	>= 35 years				No	No
377	35	Female	Parent	Married	Others		Between 100.001 and 300.000FCFA	University	Biyem-Assi 1	Bloc 8	Yes	Yes	No	No	Yes	Yes	No											14	Boy	Father		Yes	9	No		Yes	2023-01-16	2023-10-18		9		12 to 23 months	>= 35 years	No		No	No	No
378	31	Female	Parent	Married	Housekeeper		Between 100.001 and 300.000FCFA	Secondary	Biyem-Assi 1	Bloc 8	Yes	Yes	No	No	No	Yes	No											29	Girl	Mother		Yes	10	Yes	16	No						24 to 35 months	25 to 34 years				No	No
379	39	Female	Parent	Unmarried	Others		Between 60.001 and 100.000FCFA	Secondary	Biyem-Assi 1	Bloc 13	Yes	Yes	No	No	Yes	No	No											14	Boy	Mother		Yes	9	No		Yes	2023-01-07	2023-10-10		9		12 to 23 months	>= 35 years	No		No	No	No
380	34	Male	Parent	Unmarried	Others		I don't know	University	Biyem-Assi 1	carrefour caca	Yes	Yes	Yes	No	No	Yes	No											35	Girl	Aunt		Yes	9	Yes	17	No						24 to 35 months	25 to 34 years				No	No
381	36	Female	Parent	Married	Housekeeper		Between 100.001 and 300.000FCFA	Secondary	Biyem-Assi 1	carrefour caca	Yes	Yes	No	No	No	Yes	No											30	Girl	Mother		No										24 to 35 months	>= 35 years				No	No
382	25	Female	Parent	Unmarried	Others		less than 60.000FCFA	University	Biyem-Assi 1	carrefour caca	No	No							Yes	No	No	No	No	No	No	No		15	Boy	Uncle		Yes	9	No		Yes	2022-12-06	2023-09-21		9		12 to 23 months	25 to 34 years	No		No	Yes	Yes
383	19	Female	Parent	Unmarried	Others	Student	I don't know	Secondary	Biyem-Assi 1	carrefour caca	Yes	No							Yes	No	Yes	Yes	No	Yes	No	Yes	ma Mother refuse	23	Girl	Others	grand Mother	No										12 to 23 months	<= 24 years				No	No
384	40	Female	Guadian	Married	Housekeeper		less than 60.000FCFA	University	Biyem-Assi 1	Bloc 24	Yes	No							Yes	Yes	Yes	No	No	Yes	No	No		25	Girl	Aunt		No										24 to 35 months	>= 35 years				No	No
385	25	Female	Guadian	Unmarried	Others		More than 300.000FCFA	University	Biyem-Assi 1	Bloc 24	Yes	No							Yes	Yes	Yes	No	No	Yes	No	No		24	Girl	Mother		Yes	10	Yes	16	Yes	2022-03-17	2023-01-19	2023-07-21	10	16	24 to 35 months	25 to 34 years	Yes	No	Yes	No	Yes
386	34	Male	Guadian	Married	Others		Between 100.001 and 300.000FCFA	University	Biyem-Assi 1	Bloc 24	No	Yes	No	No	No	No	Yes	sa mere exige										34	Boy	Uncle		Yes	9	Yes	15	Yes	2021-05-16	2022-02-18	2022-09-19	9	16	24 to 35 months	25 to 34 years	No	No	No	No	No
387	20	Female	Guadian	Unmarried	Others		less than 60.000FCFA	Secondary	Biyem-Assi 1	Bloc 9	Yes	Yes	No	No	No	Yes	No											12	Girl	Mother		Yes	9	No		No						12 to 23 months	<= 24 years				No	No
388	32	Male	Guadian	Married	Others		I don't know	Secondary	Biyem-Assi 1	petit genie	Yes	Yes	No	No	No	Yes	No											22	Girl	Mother		Yes	9	No		No						12 to 23 months	25 to 34 years				No	No
389	25	Male	Parent	Unmarried	Others		less than 60.000FCFA	Secondary	Biyem-Assi 1	petit genie	Yes	Yes	No	No	No	Yes	No											24	Girl	Mother		I don't know		I don't know		No						24 to 35 months	25 to 34 years				No	No
390	29	Female	Parent	Married	Housekeeper		less than 60.000FCFA	Primary	Biyem-Assi 1	Bloc 24	Yes	Yes	Yes	No	No	Yes	No											28	Boy	Mother		Yes	9	Yes	15	Yes	2021-11-16	2022-08-22	2023-02-27	9	15	24 to 35 months	25 to 34 years	No	No	No	No	No
391	25	Male	Guadian	Unmarried	Others		less than 60.000FCFA	Secondary	Biyem-Assi 1	3 tombeaux	No	No							Yes	No	No	No	No	No	No	No		28	Girl	Mother		No										24 to 35 months	25 to 34 years				Yes	Yes
392	27	Female	Parent	Unmarried	Others		less than 60.000FCFA	Secondary	Biyem-Assi 1	rue st marc	Yes	Yes	Yes	No	No	Yes	No											24	Girl	Mother		Yes	9	Yes	15	No						24 to 35 months	25 to 34 years				No	No
393	24	Female	Parent	Unmarried	Others		less than 60.000FCFA	Secondary	Biyem-Assi 1	rue st marc	Yes	Yes	No	No	No	Yes	No											26	Girl	Mother		Yes	9	I don't know		No						24 to 35 months	<= 24 years				No	No
394	31	Female	Parent	Unmarried	Others		Between 60.001 and 100.000FCFA	Secondary	Biyem-Assi 1	Bloc 13	Yes	Yes	No	No	No	Yes	No											28	Girl	Mother		Yes	9	Yes	15	Yes	2021-11-27	2022-08-29	2023-02-27	9	15	24 to 35 months	25 to 34 years	No	No	No	No	No
395	32	Female	Parent	Unmarried	Housekeeper		less than 60.000FCFA	Secondary	Biyem-Assi 1	rue st marc	Yes	Yes	Yes	No	No	No	No											28	Girl	Mother		Yes	9	Yes	15	Yes	2021-11-22	2022-10-17	2023-12-20	10	24	24 to 35 months	25 to 34 years	Yes	Yes	Yes	No	Yes
396	27	Female	Parent	Unmarried	Housekeeper		less than 60.000FCFA	Secondary	Biyem-Assi 1	parlement eto'o	Yes	Yes	No	No	No	Yes	No											26	Boy	Mother		Yes	9	Yes	15	No						24 to 35 months	25 to 34 years				No	No
397	27	Female	Parent	Unmarried	Housekeeper		Between 60.001 and 100.000FCFA	Secondary	Biyem-Assi 1	parlement eto'o	Yes	Yes	Yes	No	No	No	No											24	Girl	Mother		Yes	10	Yes	16	Yes	2022-03-17	2022-12-19	2023-06-21	9	15	24 to 35 months	25 to 34 years	No	No	No	No	No
398	32	Female	Parent	Married	Housekeeper		Between 60.001 and 100.000FCFA	Secondary	Biyem-Assi 1	Bloc 13	Yes	Yes	Yes	No	No	Yes	No											21	Boy	Mother		Yes	9	Yes	15	Yes	2022-06-03	2023-03-06	2023-09-11	9	15	12 to 23 months	25 to 34 years	No	No	No	No	No
399	23	Female	Parent	Unmarried	Others		Between 60.001 and 100.000FCFA	Primary	Biyem-Assi 1	3 tombeaux	Yes	No							Yes	Yes	Yes	No	No	Yes	No	No		14	Boy	Mother		No										12 to 23 months	<= 24 years				No	No
400	35	Female	Parent	Married	Others		Between 100.001 and 300.000FCFA	Secondary	Biyem-Assi 1	3 tombeaux	Yes	Yes	No	No	Yes	Yes	No											22	Girl	Mother		Yes	9	Yes	15	Yes	2022-05-13	2023-02-17	2023-09-08	9	15	12 to 23 months	>= 35 years	No	No	No	No	No
401	34	Female	Parent	Married	Others		Between 60.001 and 100.000FCFA	Secondary	Biyem-Assi 1	Bloc 13	Yes	Yes	Yes	Yes	No	Yes	No											32	Boy	Mother		Yes	9	No		Yes	2021-07-06	2022-04-08		9		24 to 35 months	25 to 34 years	No		No	No	No
402	38	Female	Parent	Married	Others		Between 100.001 and 300.000FCFA	University	Biyem-Assi 1	rond point express	Yes	Yes	No	Yes	No	No	No											35	Girl	Sister		Yes	0	Yes	0	No						24 to 35 months	>= 35 years				No	No
403	37	Male	Parent	Unmarried	Others		Between 60.001 and 100.000FCFA	University	Biyem-Assi 1	rond point express	No	No							Yes	No	No	No	No	No	No	No		26	Girl	Father		I don't know		I don't know		No						24 to 35 months	>= 35 years				Yes	Yes
404	37	Female	Guadian	Unmarried	Others		I don't know	Secondary	Biyem-Assi 1	rond point express	Yes	No							Yes	No	No	No	No	Yes	No	No		22	Girl	Father		Yes	10	No		No						12 to 23 months	>= 35 years				No	No
405	29	Female	Guadian	Married	Others		Between 100.001 and 300.000FCFA	University	Biyem-Assi 1	rond point express	No	No							No	Yes	Yes	Yes	No	No	No	No		30	Girl	Mother		I don't know		I don't know		Yes	2021-09-07	2022-07-14	2023-02-17	10	17	24 to 35 months	25 to 34 years	Yes	No	Yes	Yes	Yes
406	32	Female	Guadian	Unmarried	Others		less than 60.000FCFA	Secondary	Biyem-Assi 1	petit genie	No	No							No	Yes	Yes	Yes	No	No	No	No		30	Boy	Aunt		No										24 to 35 months	25 to 34 years				Yes	Yes
407	40	Male	Parent	Married	Others		Between 60.001 and 100.000FCFA	University	Biyem-Assi 1	petit genie	Yes	Yes	No	Yes	No	Yes	No											15	Girl	Mother		Yes	9	Yes	15	No						12 to 23 months	>= 35 years				No	No
408	17	Female	Guadian	Unmarried	Housekeeper		More than 300.000FCFA	Secondary	Biyem-Assi 1	petit genie	Yes	Yes	No	Yes	No	No	No											21	Boy	Aunt		Yes	9	No		No						12 to 23 months	<= 24 years				No	No
409	28	Female	Parent	Married	Others		Between 100.001 and 300.000FCFA	University	Biyem-Assi 1	petit genie	Yes	Yes	No	No	Yes	No	No											25	Boy	Mother		Yes	9	I don't know		No						24 to 35 months	25 to 34 years				No	No
410	35	Female	Guadian	Unmarried	Housekeeper		Between 60.001 and 100.000FCFA	Secondary	Biyem-Assi 1	Bloc 14	Yes	Yes	Yes	No	No	Yes	No											25	Girl	Mother		Yes	0	Yes	0	Yes	2022-02-13	2022-11-18	2023-07-20	9	17	24 to 35 months	>= 35 years	No	No	No	No	No
411	52	Female	Guadian	Married	Others		Between 60.001 and 100.000FCFA	University	Biyem-Assi 1	Bloc 14	Yes	Yes	Yes	No	No	No	No											26	Boy	Mother		I don't know		I don't know		No						24 to 35 months	>= 35 years				No	No
412	36	Female	Parent	Married	Others		Between 60.001 and 100.000FCFA	Secondary	Biyem-Assi 1	Bloc 15	Yes	Yes	Yes	No	No	No	No											24	Girl	Mother		Yes	9	Yes	15	No						24 to 35 months	>= 35 years				No	No
413	33	Female	Parent	Married	Others		Between 60.001 and 100.000FCFA	Secondary	Biyem-Assi 1	Bloc 9	Yes	Yes	No	No	No	No	No											24	Boy	Aunt		No										24 to 35 months	25 to 34 years				No	No
414	30	Male	Guadian	Married	Others		Between 60.001 and 100.000FCFA	University	Biyem-Assi 1	Bloc 9	Yes	Yes	Yes	No	No	Yes	No											26	Girl	Aunt		Yes	0	Yes	0	No						24 to 35 months	25 to 34 years				No	No
415	44	Male	Parent	Married	Others		Between 100.001 and 300.000FCFA	University	Mvog-Betsi	CHATEAU	Yes	Yes	No	No	No	Yes	No											26	Girl	Mother		I don't know		I don't know		No						24 to 35 months	>= 35 years				No	No
416	43	Female	Parent	Unmarried	Others		Between 60.001 and 100.000FCFA	Secondary	Mvog-Betsi	CHATEAU	Yes	Yes	No	No	No	Yes	No											31	Girl	Mother		Yes	6	Yes	9	Yes	2021-08-01	2022-05-10	2022-11-14	9	15	24 to 35 months	>= 35 years	No	No	No	No	No
417	35	Female	Parent	Unmarried	Housekeeper		Between 60.001 and 100.000FCFA	Secondary	Mvog-Betsi	STADE MVOG-BETSI	No	No							No	Yes	Yes	No	No	No	No	No		27	Girl	Mother		Yes	9	Yes	15	Yes	2021-12-11	2022-09-14	2023-05-15	9	17	24 to 35 months	>= 35 years	No	No	No	Yes	Yes
418	33	Female	Parent	Married	Others		less than 60.000FCFA	Primary	Mvog-Betsi	DERRIERE GENDARMERIE	Yes	Yes	No	No	No	Yes	No											26	Girl	Mother		Yes	9	Yes	15	No						24 to 35 months	25 to 34 years				No	No
419	36	Female	Parent	Married	Others		Between 100.001 and 300.000FCFA	University	Mvog-Betsi	CHATEAU	Yes	Yes	Yes	No	No	Yes	No											27	Girl	Mother		Yes	9	Yes	16	No						24 to 35 months	>= 35 years				No	No
420	34	Female	Parent	Unmarried	Others		less than 60.000FCFA	Primary	Mvog-Betsi	CHATEAU	Yes	Yes	No	No	No	Yes	No											27	Girl	Mother		Yes	0	Yes	0	No						24 to 35 months	25 to 34 years				No	No
421	27	Female	Parent	Unmarried	Others		less than 60.000FCFA	University	Mvog-Betsi	CHATEAU	Yes	Yes	No	No	No	Yes	No											17	Girl	Aunt		Yes	0	I don't know		Yes	2022-10-05	2023-07-07	2024-02-13	9	16	12 to 23 months	25 to 34 years	No	No	No	No	No
422	47	Female	Parent	Married	Others		Between 60.001 and 100.000FCFA	Secondary	Mvog-Betsi	CHATEAU	Yes	Yes	Yes	No	No	Yes	No											26	Girl	Sister		Yes	9	Yes	18	Yes	2022-01-12	2022-10-12	2023-05-05	9	15	24 to 35 months	>= 35 years	No	No	No	No	No
423	43	Female	Parent	Married	Others		I don't know	Secondary	Mvog-Betsi	CHATEAU	No	No							Yes	Yes	Yes	Yes	No	No	No	No		27	Girl	Mother		No										24 to 35 months	>= 35 years				Yes	Yes
424	35	Female	Parent	Unmarried	Others		I don't know	Secondary	Mvog-Betsi	CHATEAU	Yes	Yes	No	No	No	Yes	No											32	Girl	Mother		Yes	0	Yes	0	No						24 to 35 months	>= 35 years				No	No
425	43	Female	Parent	Unmarried	Others		less than 60.000FCFA	Primary	Mvog-Betsi	CHATEAU	Yes	Yes	No	No	No	Yes	No											28	Boy	Sister		Yes	0	Yes	0	Yes	2021-11-05	2022-09-02	2023-02-10	9	15	24 to 35 months	>= 35 years	No	No	No	No	No
426	39	Female	Parent	Unmarried	Others		I don't know	Secondary	Mvog-Betsi	CHATEAU	Yes	Yes	No	No	No	Yes	No											23	Girl	Mother		Yes	0	No		Yes	2022-04-12	2023-01-13		9		12 to 23 months	>= 35 years	No		No	No	No
427	34	Female	Parent	Unmarried	Others		I don't know	University	Mvog-Betsi	CHATEAU	Yes	Yes	No	No	No	Yes	No											18	Girl	Mother		Yes	9	Yes	15	No						12 to 23 months	25 to 34 years				No	No
428	39	Female	Parent	Married	Others		Between 60.001 and 100.000FCFA	Secondary	Mvog-Betsi	BEATITUDE	No	No							No	No	No	Yes	No	No	No	No		32	Girl	Mother		No										24 to 35 months	>= 35 years				Yes	Yes
429	53	Male	Parent	Married	Others		Between 60.001 and 100.000FCFA	University	Mvog-Betsi	BEATITUDE	No	No							No	No	Yes	Yes	No	No	No	No		27	Girl	Mother		No										24 to 35 months	>= 35 years				Yes	Yes
430	37	Female	Parent	Unmarried	Others		Between 60.001 and 100.000FCFA	Secondary	Mvog-Betsi	BEATITUDE	Yes	Yes	No	No	No	Yes	No											27	Girl	Sister		Yes	9	Yes	15	Yes	2021-12-13	2022-09-20	2023-03-20	9	15	24 to 35 months	>= 35 years	No	No	No	No	No
431	43	Female	Parent	Unmarried	Others		Between 60.001 and 100.000FCFA	Primary	Mvog-Betsi	BEATITUDE	Yes	Yes	No	No	No	Yes	No											26	Girl	Mother		Yes	0	Yes	0	No						24 to 35 months	>= 35 years				No	No
432	33	Female	Parent	Unmarried	Housekeeper		less than 60.000FCFA	Secondary	Mvog-Betsi	BEATITUDE	Yes	Yes	Yes	No	No	No	No											28	Boy	Cousine		No										24 to 35 months	25 to 34 years				No	No
433	43	Female	Guadian	Unmarried	Others		Between 60.001 and 100.000FCFA	Secondary	Mvog-Betsi	TERMINUS	Yes	Yes	No	No	No	Yes	No											19	Boy	Sister		Yes	0	No		Yes	2022-08-07	2023-05-12		9		12 to 23 months	>= 35 years	No		No	No	No
434	47	Female	Parent	Unmarried	Others		Between 60.001 and 100.000FCFA	Primary	Mvog-Betsi	PEACE HOME	Yes	Yes	Yes	No	No	No	No											22	Girl	Sister		Yes	0	Yes	0	No						12 to 23 months	>= 35 years				No	No
435	39	Female	Parent	Married	Others		Between 60.001 and 100.000FCFA	Primary	Mvog-Betsi	PEACE HOME	Yes	Yes	No	No	No	Yes	No											25	Boy	Mother		Yes	0	No		Yes	2022-02-18	2022-12-22		10		24 to 35 months	>= 35 years	Yes		Yes	No	Yes
436	36	Female	Parent	Married	Others		less than 60.000FCFA	Primary	Mvog-Betsi	PEACE HOME	No	No							Yes	No	No	Yes	No	Yes	No	No		27	Girl	Mother		No										24 to 35 months	>= 35 years				Yes	Yes
437	28	Female	Parent	Unmarried	Others		Between 60.001 and 100.000FCFA	University	Mvog-Betsi	PEACE HOME	Yes	Yes	Yes	No	No	No	No											33	Boy	Aunt		Yes	9	Yes	15	Yes	2022-11-27	2023-10-30	2024-03-06	11	15	24 to 35 months	25 to 34 years	Yes	No	Yes	No	Yes
438	42	Female	Parent	Married	Others		Between 60.001 and 100.000FCFA	University	Mvog-Betsi	PEACE HOME	Yes	Yes	No	No	No	Yes	No											29	Girl	Mother		Yes	0	Yes	0	No						24 to 35 months	>= 35 years				No	No
439	27	Female	Parent	Married	Housekeeper		I don't know	Primary	Mvog-Betsi	TERMINUS	Yes	Yes	No	No	No	Yes	No											32	Boy	Mother		I don't know		I don't know		No						24 to 35 months	25 to 34 years				No	No
440	38	Female	Parent	Unmarried	Others		Between 60.001 and 100.000FCFA	Secondary	Mvog-Betsi	TERMINUS	Yes	Yes	No	No	Yes	Yes	No											30	Girl	Mother		Yes	0	Yes	15	Yes	2021-10-15	2022-07-15	2023-02-03	9	15	24 to 35 months	>= 35 years	No	No	No	No	No
441	37	Female	Parent	Unmarried	Others		less than 60.000FCFA	Primary	Mvog-Betsi	TERMINUS	Yes	Yes	No	No	No	Yes	No											29	Boy	Mother		Yes	0	Yes	0	Yes	2021-10-16	2022-08-19	2023-02-06	10	15	24 to 35 months	>= 35 years	Yes	No	Yes	No	Yes
442	42	Female	Parent	Unmarried	Others		Between 60.001 and 100.000FCFA	Secondary	Mvog-Betsi	TERMINUS	Yes	Yes	Yes	No	No	Yes	No											30	Girl	Aunt		Yes	9	Yes	15	Yes	2021-09-30	2022-07-15	2023-01-06	9	15	24 to 35 months	>= 35 years	No	No	No	No	No
443	31	Female	Parent	Unmarried	Housekeeper		I don't know	Secondary	Mvog-Betsi	ZONE CONFIANCE	No	No							No	Yes	Yes	Yes	No	Yes	No	No		27	Boy	Mother		No										24 to 35 months	25 to 34 years				Yes	Yes
444	22	Female	Guadian	Unmarried	Others		I don't know	Secondary	Mvog-Betsi	ZONE CONFIANCE	Yes	Yes	No	No	No	Yes	No											21	Girl	Mother		I don't know		I don't know		Yes	2022-06-07	2023-03-22	2023-09-08	9	15	12 to 23 months	<= 24 years	No	No	No	No	No
445	38	Female	Guadian	Married	Others		Between 60.001 and 100.000FCFA	Secondary	Mvog-Betsi	ZONE CONFIANCE	Yes	No							Yes	No	No	No	No	Yes	No	Yes	LEUR PERE N'ACCEPTE PAS	34	Girl	Aunt		No										24 to 35 months	>= 35 years				No	No
446	45	Female	Parent	Unmarried	Others		Between 60.001 and 100.000FCFA	Secondary	Mvog-Betsi	ZONE CONFIANCE	Yes	Yes	Yes	No	No	No	No											26	Girl	Mother		Yes	0	No		Yes	2021-06-27	2022-04-08		9		24 to 35 months	>= 35 years	No		No	No	No
447	26	Female	Parent	Unmarried	Housekeeper		less than 60.000FCFA	Secondary	Mvog-Betsi	ZONE CONFIANCE	Yes	Yes	No	No	No	Yes	No											30	Girl	Mother		Yes	0	Yes	0	Yes	2021-09-18	2022-07-15	2023-01-10	9	15	24 to 35 months	25 to 34 years	No	No	No	No	No
448	42	Female	Parent	Unmarried	Others		Between 60.001 and 100.000FCFA	Secondary	Mvog-Betsi	TERMINUS	Yes	Yes	Yes	No	No	Yes	No											18	Boy	Mother		Yes	0	No		Yes	2022-09-12	2023-06-16		9		12 to 23 months	>= 35 years	No		No	No	No
449	44	Female	Parent	Unmarried	Others		less than 60.000FCFA	Primary	Mvog-Betsi	TERMINUS	Yes	No							No	No	No	No	Yes	No	No	No		33	Girl	Cousine		No										24 to 35 months	>= 35 years				No	No
450	43	Female	Guadian	Unmarried	Others		Between 100.001 and 300.000FCFA	University	Mvog-Betsi	TERMINUS	Yes	Yes	No	No	No	Yes	No											27	Girl	Sister		I don't know		I don't know		No						24 to 35 months	>= 35 years				No	No
451	37	Female	Parent	Unmarried	Others		Between 60.001 and 100.000FCFA	University	Mvog-Betsi	TERMINUS	Yes	Yes	No	No	No	Yes	No											18	Boy	Mother		Yes	0	Yes	0	Yes	2022-09-13	2023-06-16	2023-12-18	9	15	12 to 23 months	>= 35 years	No	No	No	No	No
452	37	Female	Parent	Married	Others		Between 60.001 and 100.000FCFA	University	Mvog-Betsi	TERMINUS	No	No							No	No	Yes	No	No	No	No	No		23	Girl	Mother		Yes	0	I don't know		No						12 to 23 months	>= 35 years				Yes	Yes
453	47	Female	Guadian	Married	Others		Between 60.001 and 100.000FCFA	University	Mvog-Betsi	CIMETIERE SCIENCE	Yes	Yes	No	No	No	Yes	No											21	Boy	Mother		Yes	9	Yes	15	Yes	2022-06-06	2023-03-09	2023-09-12	9	15	12 to 23 months	>= 35 years	No	No	No	No	No
454	42	Female	Parent	Unmarried	Others		Between 60.001 and 100.000FCFA	Primary	Mvog-Betsi	CIMETIERE SCIENCE	Yes	Yes	No	No	No	Yes	No											19	Boy	Mother		Yes	0	Yes	0	No						12 to 23 months	>= 35 years				No	No
455	43	Female	Parent	Married	Others		I don't know	Primary	Mvog-Betsi	CIMETIERE SCIENCE	Yes	Yes	No	No	No	Yes	No											29	Girl	Mother		Yes	0	Yes	0	No						24 to 35 months	>= 35 years				No	No
456	36	Female	Parent	Unmarried	Housekeeper		less than 60.000FCFA	Secondary	Mvog-Betsi	CIMETIERE SCIENCE	Yes	Yes	No	No	No	Yes	No											28	Boy	Mother		Yes	0	No		Yes	2021-11-13	2022-08-16		9		24 to 35 months	>= 35 years	No		No	No	No
457	33	Female	Parent	Unmarried	Others		Between 60.001 and 100.000FCFA	University	Mvog-Betsi	CIMETIERE SCIENCE	Yes	Yes	No	No	No	Yes	No											35	Boy	Mother		Yes	0	Yes	0	No						24 to 35 months	25 to 34 years				No	No
458	23	Female	Parent	Unmarried	Others		I don't know	Secondary	Mvog-Betsi	ETOUG-EBE LYCEE	Yes	Yes	No	No	No	Yes	No											21	Girl	Mother		Yes	9	Yes	15	Yes	2022-06-03	2023-03-08	2023-09-15	9	15	12 to 23 months	<= 24 years	No	No	No	No	No
459	33	Female	Parent	Married	Others		Between 60.001 and 100.000FCFA	University	Mvog-Betsi	ETOUG-EBE LYCEE	Yes	Yes	No	No	No	Yes	No											26	Girl	Mother		Yes	0	Yes	0	Yes	2022-01-19	2022-11-04	2023-06-08	9	16	24 to 35 months	25 to 34 years	No	No	No	No	No
460	36	Female	Parent	Married	Others		Between 60.001 and 100.000FCFA	Secondary	Mvog-Betsi	ETOUG-EBE LYCEE	Yes	Yes	No	Yes	No	Yes	No											18	Girl	Aunt		Yes	9	Yes	15	Yes	2022-11-11	2023-09-27	2024-03-04	10	15	12 to 23 months	>= 35 years	Yes	No	Yes	No	Yes
461	24	Female	Parent	Unmarried	Others		less than 60.000FCFA	University	Mvog-Betsi	ETOUG-EBE LYCEE	Yes	Yes	Yes	No	No	No	No											27	Girl	Mother		Yes	9	No		Yes	2022-01-24	2022-12-23		10		24 to 35 months	<= 24 years	Yes		Yes	No	Yes
462	31	Female	Parent	Unmarried	Others		less than 60.000FCFA	University	Mvog-Betsi	ETOUG-EBE LYCEE	Yes	Yes	No	Yes	Yes	Yes	No											24	Girl	Mother		Yes	6	Yes	15	No						24 to 35 months	25 to 34 years				No	No
463	34	Female	Parent	Married	Others		Between 100.001 and 300.000FCFA	Secondary	Mvog-Betsi	ETOUG-EBE LYCEE	Yes	Yes	No	No	No	Yes	No											28	Boy	Cousine		Yes	9	Yes	16	Yes	2021-11-22	2022-09-23	2023-04-07	10	16	24 to 35 months	25 to 34 years	Yes	No	Yes	No	Yes
464	29	Male	Parent	Unmarried	Others		Between 60.001 and 100.000FCFA	Primary	Mvog-Betsi	DERRIERE CMA	Yes	Yes	No	No	No	Yes	No											34	Boy	Aunt		I don't know		I don't know		No						24 to 35 months	25 to 34 years				No	No
465	32	Female	Parent	Unmarried	Housekeeper		less than 60.000FCFA	Primary	Mvog-Betsi	DERRIERE CMA	Yes	Yes	Yes	No	No	No	No											33	Boy	Mother		I don't know		I don't know		No						24 to 35 months	25 to 34 years				No	No
466	44	Female	Parent	Unmarried	Others		Between 60.001 and 100.000FCFA	Secondary	Mvog-Betsi	DERRIERE CMA	Yes	Yes	No	No	No	Yes	No											27	Boy	Mother		Yes	0	Yes	0	Yes	2021-12-12	2022-09-16	2023-10-23	9	22	24 to 35 months	>= 35 years	No	Yes	Yes	No	Yes
467	26	Female	Parent	Unmarried	Housekeeper		less than 60.000FCFA	Secondary	Mvog-Betsi	DERRIERE CMA	Yes	No							No	Yes	Yes	No	No	No	No	No		24	Girl	Mother		No										24 to 35 months	25 to 34 years				No	No
468	32	Female	Parent	Unmarried	Others		Between 60.001 and 100.000FCFA	Secondary	Mvog-Betsi	BAPTIST BAS FOND	Yes	Yes	No	No	No	Yes	No											15	Girl	Mother		Yes	0	No		Yes	2023-01-13	2023-11-06		9		12 to 23 months	25 to 34 years	No		No	No	No
469	30	Female	Guadian	Unmarried	Others		less than 60.000FCFA	University	Mvog-Betsi	BAPTIST BAS FOND	Yes	Yes	Yes	No	No	No	No											19	Boy	Mother		No										12 to 23 months	25 to 34 years				No	No
470	27	Male	Guadian	Unmarried	Others		Between 60.001 and 100.000FCFA	University	Mvog-Betsi	BAPTIST BAS FOND	Yes	Yes	No	No	No	Yes	No											19	Boy	Mother		I don't know		I don't know		No						12 to 23 months	25 to 34 years				No	No
471	44	Female	Parent	Married	Others		less than 60.000FCFA	None	Mvog-Betsi	BAPTIST BAS FOND	Yes	Yes	No	No	No	Yes	No											26	Girl	Sister		Yes	0	Yes	0	Yes	2022-01-08	2022-10-18	2023-04-14	9	15	24 to 35 months	>= 35 years	No	No	No	No	No
472	54	Female	Guadian	Unmarried	Others		Between 60.001 and 100.000FCFA	Secondary	Mvog-Betsi	BAPTIST BAS FOND	Yes	No							No	Yes	Yes	No	No	No	No	Yes	LES PARENTS NE SONT PAS D'ACCORD	30	Boy	Others	grand Mother	No										24 to 35 months	>= 35 years				No	No
473	42	Female	Parent	Unmarried	Others		Between 60.001 and 100.000FCFA	University	Mvog-Betsi	DERRIERE BAPTIST	No	No							Yes	No	Yes	No	No	Yes	No	No		17	Boy	Mother		No										12 to 23 months	>= 35 years				Yes	Yes
474	46	Male	Parent	Married	Others		less than 60.000FCFA	Secondary	Mvog-Betsi	DERRIERE BAPTIST	Yes	Yes	Yes	Yes	Yes	Yes	No											29	Girl	Father		Yes	0	Yes	0	Yes	2021-10-14	2022-07-15	2023-01-17	9	15	24 to 35 months	>= 35 years	No	No	No	No	No
475	42	Female	Parent	Married	Others		Between 60.001 and 100.000FCFA	Secondary	Mvog-Betsi	DERRIERE BAPTIST	Yes	Yes	No	No	No	Yes	No											32	Boy	Mother		Yes	9	Yes	15	Yes	2021-07-17	2022-04-19	2022-10-21	9	15	24 to 35 months	>= 35 years	No	No	No	No	No
476	38	Female	Parent	Unmarried	Housekeeper		less than 60.000FCFA	Secondary	Mvog-Betsi	DERRIERE BAPTIST	Yes	Yes	No	No	No	Yes	No											27	Boy	Mother		Yes	0	Yes	0	No						24 to 35 months	>= 35 years				No	No
477	35	Female	Parent	Unmarried	Others		Between 100.001 and 300.000FCFA	University	Mvog-Betsi	DERRIERE BAPTIST	No	No							Yes	No	Yes	Yes	No	No	No	No		22	Girl	Aunt		No										12 to 23 months	>= 35 years				Yes	Yes
478	43	Female	Parent	Unmarried	Others		Between 60.001 and 100.000FCFA	University	Mvog-Betsi	ENTREE GRULIN	Yes	Yes	No	No	No	Yes	No											35	Boy	Mother		Yes	0	Yes	0	Yes	2021-04-21	2022-02-04	2022-10-19	9	17	24 to 35 months	>= 35 years	No	No	No	No	No
479	32	Female	Parent	Unmarried	Others		less than 60.000FCFA	Secondary	Mvog-Betsi	ENTREE GRULIN	Yes	Yes	No	No	No	Yes	No											25	Girl	Mother		Yes	6	Yes	9	Yes	2022-02-14	2022-11-16	2023-06-19	9	16	24 to 35 months	25 to 34 years	No	No	No	No	No
480	41	Female	Parent	Unmarried	Others		less than 60.000FCFA	Primary	Mvog-Betsi	ENTREE GRULIN	Yes	Yes	Yes	No	No	No	No											26	Girl	Mother		Yes	0	No		Yes	2022-01-10	2022-10-14		9		24 to 35 months	>= 35 years	No		No	No	No
481	56	Female	Guadian	Married	Others		Between 100.001 and 300.000FCFA	University	Mvog-Betsi	ENTREE GRULIN	Yes	Yes	Yes	Yes	No	Yes	No											34	Girl	Aunt		Yes	9	Yes	16	No						24 to 35 months	>= 35 years				No	No
482	25	Female	Parent	Unmarried	Others		I don't know	None	Mvog-Betsi	ENTREE GRULIN	Yes	Yes	Yes	No	No	No	No											24	Boy	Mother		I don't know		No		Yes	2022-03-24	2023-02-03		10		24 to 35 months	25 to 34 years	Yes		Yes	No	Yes
483	34	Female	Guadian	Unmarried	Others		I don't know	Primary	Mvog-Betsi	ENTREE GRULIN	No	No							Yes	Yes	Yes	Yes	No	No	No	No		24	Boy	Mother		No										24 to 35 months	25 to 34 years				Yes	Yes
484	28	Female	Parent	Unmarried	Others		Between 60.001 and 100.000FCFA	Secondary	Mvog-Betsi	DERRIERE ANCIENNE MAIRIE	Yes	Yes	Yes	No	No	Yes	No											22	Boy	Mother		Yes	0	No		Yes	2022-04-18	2023-01-20		9		12 to 23 months	25 to 34 years	No		No	No	No
485	38	Female	Parent	Unmarried	Others		less than 60.000FCFA	Primary	Mvog-Betsi	DERRIERE ANCIENNE MAIRIE	Yes	Yes	Yes	No	No	Yes	No											26	Girl	Mother		No										24 to 35 months	>= 35 years				No	No
486	36	Female	Parent	Unmarried	Housekeeper		less than 60.000FCFA	Secondary	Mvog-Betsi	DERRIERE ANCIENNE MAIRIE	Yes	Yes	Yes	No	No	No	No											24	Boy	Mother		Yes	9	No		Yes	2022-03-07	2022-12-16		9		24 to 35 months	>= 35 years	No		No	No	No
487	37	Female	Parent	Married	Others		Between 60.001 and 100.000FCFA	University	Mvog-Betsi	DERRIERE ANCIENNE MAIRIE	Yes	Yes	No	No	No	Yes	No											23	Girl	Mother		Yes	0	Yes	0	Yes	2022-04-03	2023-01-06	2023-08-02	9	15	12 to 23 months	>= 35 years	No	No	No	No	No
488	34	Female	Guadian	Unmarried	Others		Between 60.001 and 100.000FCFA	University	Mvog-Betsi	DERRIERE ANCIENNE MAIRIE	Yes	No							Yes	Yes	Yes	No	No	Yes	No	No		28	Girl	Mother		No										24 to 35 months	25 to 34 years				No	No
489	33	Female	Parent	Unmarried	Housekeeper		less than 60.000FCFA	Secondary	Mvog-Betsi	NOUVEAU MARCHE	Yes	Yes	Yes	No	No	No	No											28	Girl	Mother		Yes	0	No		Yes	2021-11-17	2022-09-02		9		24 to 35 months	25 to 34 years	No		No	No	No
490	43	Male	Parent	Unmarried	Others		Between 60.001 and 100.000FCFA	Secondary	Mvog-Betsi	NOUVEAU MARCHE	Yes	Yes	No	No	Yes	Yes	No											18	Boy	Mother		I don't know		No		Yes	2022-09-09	2023-06-09		9		12 to 23 months	>= 35 years	No		No	No	No
491	31	Female	Parent	Unmarried	Others		less than 60.000FCFA	Secondary	Mvog-Betsi	NOUVEAU MARCHE	Yes	Yes	No	No	No	Yes	No											27	Girl	Mother		Yes	9	Yes	0	Yes	2021-12-14	2022-09-16	2023-03-20	9	15	24 to 35 months	25 to 34 years	No	No	No	No	No
492	29	Female	Parent	Unmarried	Others		Between 60.001 and 100.000FCFA	University	Mvog-Betsi	NOUVEAU MARCHE	Yes	Yes	No	No	No	Yes	No											31	Boy	Aunt		Yes	0	Yes	0	No						24 to 35 months	25 to 34 years				No	No
493	37	Female	Guadian	Unmarried	Housekeeper		I don't know	Secondary	Mvog-Betsi	NOUVEAU MARCHE	Yes	Yes	No	No	No	Yes	No											12	Girl	Mother		Yes	0	No		Yes	2023-03-04	2024-01-08		10		12 to 23 months	>= 35 years	Yes		Yes	No	Yes
494	27	Female	Parent	Married	Others		less than 60.000FCFA	University	Mvog-Betsi	STADE MVOG-BETSI	Yes	Yes	No	No	No	Yes	No											15	Boy	Aunt		Yes	0	No		Yes	2022-12-14	2023-11-06		10		12 to 23 months	25 to 34 years	Yes		Yes	No	Yes
495	43	Female	Guadian	Unmarried	Others		Between 60.001 and 100.000FCFA	Secondary	Mvog-Betsi	STADE MVOG-BETSI	No	No							No	No	Yes	No	No	No	No	Yes	JE SUIS TOTALEMENT CONTRE VOTRE AFFAIRE LA, SURTOUT CE QU'ON MARCHE CHEZ LES GENS AVEC LA	29	Boy	Mother		No										24 to 35 months	>= 35 years				Yes	Yes
496	31	Male	Parent	Unmarried	Others		less than 60.000FCFA	Secondary	Mvog-Betsi	STADE MVOG-BETSI	Yes	Yes	No	No	No	Yes	No											21	Girl	Mother		Yes	0	Yes	0	No						12 to 23 months	25 to 34 years				No	No
497	40	Female	Parent	Unmarried	Others		less than 60.000FCFA	Secondary	Mvog-Betsi	DERRIERE GENDARMERIE	Yes	Yes	No	No	Yes	Yes	No											21	Boy	Mother		Yes	0	No		Yes	2022-06-15	2023-03-20		9		12 to 23 months	>= 35 years	No		No	No	No
498	28	Female	Guadian	Married	Others		Between 60.001 and 100.000FCFA	Secondary	Mvog-Betsi	DERRIERE GENDARMERIE	Yes	Yes	No	No	No	Yes	No											13	Girl	Aunt		No										12 to 23 months	25 to 34 years				No	No
499	43	Male	Guadian	Married	Others		Between 60.001 and 100.000FCFA	University	Mvog-Betsi	DERRIERE GENDARMERIE	Yes	Yes	No	No	No	Yes	No											28	Boy	Aunt		Yes	0	Yes	0	No						24 to 35 months	>= 35 years				No	No
500	38	Female	Guadian	Unmarried	Others		less than 60.000FCFA	Primary	Mvog-Betsi	DERRIERE GENDARMERIE	No	No							No	No	Yes	Yes	No	No	No	No		32	Boy	Mother		No										24 to 35 months	>= 35 years				Yes	Yes
501	42	Female	Parent	Unmarried	Others		less than 60.000FCFA	Primary	Mvog-Betsi	STADE MVOG-BETSI	No	No							Yes	No	No	No	No	No	No	No		29	Girl	Sister		No										24 to 35 months	>= 35 years				Yes	Yes
502	26	Female	Parent	Unmarried	Others		Between 60.001 and 100.000FCFA	University	Mvog-Betsi	DERRIERE CMA	Yes	Yes	No	No	No	Yes	No											27	Girl	Mother		Yes	9	Yes	15	Yes	2021-12-12	2022-10-05	2023-07-10	9	18	24 to 35 months	25 to 34 years	No	No	No	No	No
503	48	Female	Parent	Married	Others		Between 60.001 and 100.000FCFA	Secondary	Mvog-Betsi	DERRIERE CMA	Yes	Yes	No	No	No	Yes	No											31	Girl	Mother		Yes	0	Yes	0	Yes	2021-07-28	2022-05-06	2022-11-07	9	15	24 to 35 months	>= 35 years	No	No	No	No	No
504	37	Female	Parent	Married	Others		Between 60.001 and 100.000FCFA	University	Mvog-Betsi	BAOBA	Yes	Yes	No	No	No	Yes	No											28	Girl	Mother		Yes	0	Yes	0	No						24 to 35 months	>= 35 years				No	No
505	53	Male	Guadian	Unmarried	Others		less than 60.000FCFA	Secondary	Mvog-Betsi	STADE MVOG-BETSI	Yes	Yes	No	No	No	Yes	No											35	Boy	Mother		No										24 to 35 months	>= 35 years				No	No
506	49	Female	Parent	Married	Others		Between 100.001 and 300.000FCFA	University	Mvog-Betsi	STADE MVOG-BETSI	Yes	Yes	No	No	Yes	Yes	No											34	Boy	Mother		Yes	0	Yes	0	Yes	2021-07-26	2022-05-13	2022-11-04	9	15	24 to 35 months	>= 35 years	No	No	No	No	No
507	36	Female	Parent	Unmarried	Others		Between 60.001 and 100.000FCFA	Secondary	Mvog-Betsi	TERMINUS	Yes	Yes	No	No	No	Yes	No											29	Boy	Mother		Yes	0	Yes	0	No						24 to 35 months	>= 35 years				No	No
508	43	Female	Parent	Unmarried	Others		Between 60.001 and 100.000FCFA	University	Mvog-Betsi	TERMINUS	Yes	Yes	No	No	No	Yes	No											28	Girl	Mother		Yes	0	Yes	0	No						24 to 35 months	>= 35 years				No	No
509	41	Female	Guadian	Unmarried	Others		Between 60.001 and 100.000FCFA	University	Mvog-Betsi	STADE MVOG-BETSI	Yes	Yes	No	No	Yes	Yes	No											20	Boy	Mother		Yes	9	Yes	15	Yes	2022-07-11	2023-05-11	2023-10-13	10	15	12 to 23 months	>= 35 years	Yes	No	Yes	No	Yes
510	29	Female	Parent	Unmarried	Housekeeper		I don't know	University	Mvog-Betsi	BAOBA	Yes	Yes	No	No	No	Yes	No											30	Girl	Mother		Yes	6	No		Yes	2021-07-28	2022-05-05		9		24 to 35 months	25 to 34 years	No		No	No	No
511	35	Female	Parent	Married	Others		Between 60.001 and 100.000FCFA	University	Mvog-Betsi	BAOBA	Yes	Yes	No	No	Yes	No	No											30	Boy	Mother		Yes	0	Yes	0	Yes	2021-10-30	2022-08-01	2023-02-06	9	15	24 to 35 months	>= 35 years	No	No	No	No	No
512	22	Female	Parent	Unmarried	Others		less than 60.000FCFA	Secondary	Mvog-Betsi	BAOBA	Yes	Yes	No	No	No	Yes	No											29	Boy	Mother		Yes	0	Yes	0	Yes	2021-09-28	2022-07-15	2023-02-07	9	16	24 to 35 months	<= 24 years	No	No	No	No	No
513	43	Female	Parent	Unmarried	Others		Between 60.001 and 100.000FCFA	University	Mvog-Betsi	BAOBA	Yes	Yes	No	No	No	Yes	No											23	Boy	Mother		Yes	0	Yes	0	No						12 to 23 months	>= 35 years				No	No
514	46	Male	Parent	Married	Others		Between 60.001 and 100.000FCFA	University	Mvog-Betsi	DERRIERE GENDARMERIE	Yes	Yes	No	No	No	Yes	No											16	Girl	Mother		Yes	0	Yes	0	No						12 to 23 months	>= 35 years				No	No
515	28	Female	Parent	Unmarried	Others		less than 60.000FCFA	University	Mvog-Betsi	CARREFOUR BEIGNET	Yes	Yes	No	No	No	Yes	No											27	Boy	Mother		Yes	0	Yes	0	No						24 to 35 months	25 to 34 years				No	No
516	36	Female	Parent	Unmarried	Others		I don't know	University	Mvog-Betsi	CARREFOUR BEIGNET	Yes	Yes	No	No	No	Yes	No											19	Girl	Mother		Yes	0	No		Yes	2022-07-12	2023-04-18		9		12 to 23 months	>= 35 years	No		No	No	No
517	41	Female	Guadian	Unmarried	Housekeeper		I don't know	University	Mvog-Betsi	CARREFOUR BEIGNET	Yes	Yes	No	No	Yes	Yes	No											33	Boy	Mother		Yes	10	No		Yes	2021-06-09	2022-04-11		10		24 to 35 months	>= 35 years	Yes		Yes	No	Yes
518	38	Female	Parent	Married	Others		less than 60.000FCFA	Secondary	Mvog-Betsi	CARREFOUR BEIGNET	Yes	Yes	No	No	No	Yes	No											18	Girl	Mother		No										12 to 23 months	>= 35 years				No	No
519	37	Female	Parent	Unmarried	Others		less than 60.000FCFA	Secondary	Mvog-Betsi	DERRIERE GENDARMERIE	Yes	Yes	No	No	Yes	Yes	No											28	Girl	Mother		Yes	9	No		Yes	2021-11-10	2022-08-19		9		24 to 35 months	>= 35 years	No		No	No	No
520	21	Female	Parent	Unmarried	Others		less than 60.000FCFA	Secondary	Mvog-Betsi	FERME	Yes	Yes	No	No	No	Yes	No											12	Boy	Mother		Yes	0	No		Yes	2023-03-07	2023-12-12		9		12 to 23 months	<= 24 years	No		No	No	No
521	30	Female	Parent	Unmarried	Others		Between 60.001 and 100.000FCFA	Primary	Mvog-Betsi	FERME	Yes	No							Yes	No	No	No	No	No	No	No		14	Girl	Mother		No										12 to 23 months	25 to 34 years				No	No
522	39	Female	Parent	Married	Others		less than 60.000FCFA	Secondary	Mvog-Betsi	NOUVEAU MARCHE	Yes	Yes	No	No	No	Yes	No											15	Boy	Mother		No										12 to 23 months	>= 35 years				No	No
523	52	Female	Guadian	Unmarried	Others		I don't know	Secondary	Mvog-Betsi	FERME	Yes	Yes	Yes	No	No	Yes	No											26	Girl	Mother		Yes	9	No		Yes	2022-01-05	2022-10-12		9		24 to 35 months	>= 35 years	No		No	No	No
524	32	Female	Parent	Unmarried	Housekeeper		I don't know	Secondary	Mvog-Betsi	FERME	Yes	Yes	No	No	No	Yes	No											24	Boy	Mother		Yes	0	Yes	0	Yes	2022-03-04	2022-12-06	2023-06-09	9	15	24 to 35 months	25 to 34 years	No	No	No	No	No
525	33	Female	Parent	Unmarried	Others		I don't know	Secondary	Mvog-Betsi	FERME	Yes	Yes	No	No	No	Yes	No											17	Boy	Mother		Yes	9	No		No						12 to 23 months	25 to 34 years				No	No
526	39	Female	Parent	Unmarried	Others		Between 60.001 and 100.000FCFA	Secondary	Mvog-Betsi	FERME	Yes	Yes	No	No	No	Yes	No											24	Girl	Mother		I don't know		I don't know		No						24 to 35 months	>= 35 years				No	No
527	47	Female	Parent	Unmarried	Others		Between 60.001 and 100.000FCFA	University	Mvog-Betsi	FERME	Yes	Yes	No	No	No	Yes	No											23	Boy	Mother		Yes	0	Yes	0	Yes	2022-04-12	2023-01-17	2023-07-19	9	15	12 to 23 months	>= 35 years	No	No	No	No	No
528	38	Female	Parent	Unmarried	Others		less than 60.000FCFA	Primary	Mvog-Betsi	FERME	Yes	Yes	No	No	No	Yes	No											15	Girl	Mother		Yes	9	No		Yes	2023-01-13	2023-10-17		9		12 to 23 months	>= 35 years	No		No	No	No
529	34	Female	Parent	Unmarried	Others		less than 60.000FCFA	University	Mvog-Betsi	FERME	Yes	Yes	Yes	No	No	Yes	No											21	Girl	Mother		No										12 to 23 months	25 to 34 years				No	No
530	29	Female	Parent	Unmarried	Housekeeper		I don't know	Secondary	Mvog-Betsi	FERME	No	No							No	No	No	No	No	No	Yes	No		33	Boy	Aunt		No										24 to 35 months	25 to 34 years				Yes	Yes
531	37	Female	Guadian	Unmarried	Others		less than 60.000FCFA	Secondary	Mvog-Betsi	FERME	Yes	Yes	No	No	No	Yes	No											28	Boy	Mother		Yes	0	Yes	0	Yes	2021-11-22	2022-09-02	2023-04-05	9	16	24 to 35 months	>= 35 years	No	No	No	No	No
532	28	Female	Parent	Unmarried	Housekeeper		I don't know	Secondary	Mvog-Betsi	FERME	Yes	Yes	Yes	No	No	No	No											19	Girl	Mother		No										12 to 23 months	25 to 34 years				No	No
533	36	Male	Guadian	Married	Others		Between 60.001 and 100.000FCFA	University	Mvog-Betsi	FERME	Yes	Yes	No	No	Yes	Yes	No											31	Boy	Aunt		Yes	0	Yes	0	No						24 to 35 months	>= 35 years				No	No
534	29	Female	Parent	Unmarried	Others		less than 60.000FCFA	Secondary	Mvog-Betsi	DERRIERE CMA	Yes	Yes	No	No	Yes	Yes	No											18	Boy	Mother		I don't know		I don't know		No						12 to 23 months	25 to 34 years				No	No
535	42	Male	Parent	Married	Others		Between 100.001 and 300.000FCFA	University	Mvog-Betsi	DERRIERE CMA	Yes	Yes	No	No	Yes	Yes	No											28	Girl	Father		Yes	9	Yes	15	No						24 to 35 months	>= 35 years				No	No
536	24	Female	Parent	Married	Housekeeper		I don't know	Primary	Mvog-Betsi	SOURCE DE LA FERME	Yes	Yes	No	No	No	Yes	No											26	Girl	Mother		Yes	0	Yes	0	Yes	2022-01-30	2022-11-04	2023-06-07	9	16	24 to 35 months	<= 24 years	No	No	No	No	No
537	29	Female	Parent	Unmarried	Others		Between 60.001 and 100.000FCFA	University	Mvog-Betsi	SOURCE DE LA FERME	Yes	Yes	No	No	No	Yes	No											33	Girl	Mother		Yes	0	No		Yes	2021-06-29	2022-04-04		9		24 to 35 months	25 to 34 years	No		No	No	No
538	33	Female	Parent	Unmarried	Housekeeper		I don't know	Secondary	Mvog-Betsi	SOURCE DE LA FERME	Yes	Yes	No	No	No	Yes	No											16	Girl	Mother		Yes	9	Yes	15	Yes	2022-11-25	2023-09-29	2024-03-01	10	15	12 to 23 months	25 to 34 years	Yes	No	Yes	No	Yes
539	26	Female	Parent	Unmarried	Others		less than 60.000FCFA	Secondary	Mvog-Betsi	SOURCE DE LA FERME	Yes	Yes	Yes	No	No	Yes	No											32	Girl	Mother		No										24 to 35 months	25 to 34 years				No	No
540	30	Female	Parent	Unmarried	Housekeeper		I don't know	Primary	Mvog-Betsi	SOURCE DE LA FERME	Yes	Yes	No	No	No	Yes	No											33	Girl	Mother		Yes	9	No		Yes	2021-05-24	2022-02-28		9		24 to 35 months	25 to 34 years	No		No	No	No
541	32	Female	Parent	Married	Others		less than 60.000FCFA	Secondary	Mvog-Betsi	SOURCE DE LA FERME	Yes	Yes	No	No	No	Yes	No											20	Girl	Mother		Yes	9	Yes	15	No						12 to 23 months	25 to 34 years				No	No
542	33	Female	Parent	Married	Others		Between 60.001 and 100.000FCFA	Secondary	Mvog-Betsi	SOURCE DE LA FERME	Yes	Yes	No	No	No	Yes	No											17	Boy	Mother		Yes	0	No		Yes	2022-10-18	2023-09-01		10		12 to 23 months	25 to 34 years	Yes		Yes	No	Yes
543	27	Female	Parent	Unmarried	Others		Between 100.001 and 300.000FCFA	Secondary	Mvog-Betsi	SOURCE DE LA FERME	Yes	Yes	No	No	No	Yes	No											15	Boy	Mother		Yes	0	Yes	0	No						12 to 23 months	25 to 34 years				No	No
544	19	Female	Guadian	Unmarried	Others		I don't know	Secondary	Mvog-Betsi	NOUVEAU MARCHE	Yes	Yes	Yes	No	No	Yes	No											30	Boy	Aunt		Yes	0	Yes	0	No						24 to 35 months	<= 24 years				No	No
545	17	Female	Guadian	Unmarried	Others		I don't know	Secondary	Mvog-Betsi	NOUVEAU MARCHE	Yes	Yes	No	No	No	Yes	No											24	Girl	Aunt		I don't know		I don't know		No						24 to 35 months	<= 24 years				No	No
546	38	Female	Parent	Unmarried	Others		I don't know	Primary	Mvog-Betsi	NOUVEAU MARCHE	Yes	Yes	No	No	No	Yes	No											30	Girl	Mother		Yes	9	Yes	15	Yes	2021-09-30	2022-07-15	2023-01-06	9	15	24 to 35 months	>= 35 years	No	No	No	No	No
547	37	Female	Parent	Married	Housekeeper		I don't know	Primary	Mvog-Betsi	FERME	Yes	Yes	No	No	No	Yes	No											19	Girl	Mother		Yes	9	No		Yes	2022-08-28	2023-06-08		9		12 to 23 months	>= 35 years	No		No	No	No
548	29	Female	Parent	Unmarried	Others		less than 60.000FCFA	Secondary	Mvog-Betsi	FERME	Yes	Yes	No	No	No	Yes	No											32	Boy	Mother		Yes	0	No		Yes	2021-06-03	2022-03-11		9		24 to 35 months	25 to 34 years	No		No	No	No
549	36	Female	Parent	Unmarried	Others		less than 60.000FCFA	Primary	Mvog-Betsi	FERME	Yes	Yes	No	No	No	Yes	No											12	Boy	Mother		Yes	0	No		Yes	2023-03-03	2023-12-06		9		12 to 23 months	>= 35 years	No		No	No	No
550	30	Female	Parent	Married	Others		less than 60.000FCFA	University	Mvog-Betsi	SOURCE DE LA FERME	Yes	Yes	Yes	No	No	No	No											30	Boy	Mother		Yes	9	Yes	15	No						24 to 35 months	25 to 34 years				No	No
551	33	Female	Parent	Unmarried	Others		I don't know	Primary	Mvog-Betsi	DERRIERE CMA	No	No							No	Yes	Yes	Yes	No	No	No	No		34	Girl	Father		No										24 to 35 months	25 to 34 years				Yes	Yes
552	28	Female	Parent	Unmarried	Others		less than 60.000FCFA	Secondary	Mvog-Betsi	STADE MVOG-BETSI	Yes	No							No	No	Yes	No	No	No	No	No		28	Boy	Mother		No										24 to 35 months	25 to 34 years				No	No
553	48	Female	Guadian	Married	Others		Between 60.001 and 100.000FCFA	Secondary	Mendong	mendong	No	No							Yes	No	No	No	No	No	No	No		29	Boy	Mother		No										24 to 35 months	>= 35 years				Yes	Yes
554	23	Female	Parent	Unmarried	Others		less than 60.000FCFA	Secondary	Mendong	mendong	Yes	Yes	No	No	No	Yes	No											14	Boy	Mother		Yes	6	No		No						12 to 23 months	<= 24 years				No	No
555	21	Female	Parent	Unmarried	Others		less than 60.000FCFA	Secondary	Mendong	mendong	Yes	Yes	Yes	Yes	No	Yes	No											15	Girl	Mother		I don't know		I don't know		No						12 to 23 months	<= 24 years				No	No
556	26	Male	Parent	Unmarried	Others		less than 60.000FCFA	Secondary	Mendong	mendong	Yes	Yes	No	No	No	Yes	No											33	Girl	Cousine		Yes	10	Yes	12	Yes	2021-06-11	2022-04-08	2022-11-04	9	16	24 to 35 months	25 to 34 years	No	No	No	No	No
557	26	Female	Parent	Unmarried	Others		Between 60.001 and 100.000FCFA	Secondary	Mendong	mendong	Yes	Yes	Yes	No	No	Yes	No											20	Girl	Mother		Yes	0	Yes	0	No						12 to 23 months	25 to 34 years				No	No
558	54	Female	Guadian	Unmarried	Others		less than 60.000FCFA	None	Mendong	mendong	Yes	Yes	No	Yes	No	No	No											18	Girl	Father		Yes	0	Yes	0	Yes	2022-08-20	2023-05-23	2023-12-01	9	15	12 to 23 months	>= 35 years	No	No	No	No	No
559	24	Male	Guadian	Unmarried	Others		I don't know	Primary	Mendong	mendong	No	No							Yes	Yes	Yes	No	No	No	No	Yes	je me mefie des vaccins	19	Boy	Uncle		No										12 to 23 months	<= 24 years				Yes	Yes
560	29	Female	Guadian	Unmarried	Others	Student	less than 60.000FCFA	University	Mendong	mendong	Yes	Yes	Yes	No	No	No	No											14	Boy	Cousine		Yes	9	I don't know		No						12 to 23 months	25 to 34 years				No	No
561	26	Female	Parent	Unmarried	Others		Between 60.001 and 100.000FCFA	Secondary	Mendong	mendong	Yes	Yes	Yes	Yes	No	Yes	No											31	Boy	Mother		Yes	9	Yes	16	Yes	2021-08-18	2022-05-20	2022-12-02	9	15	24 to 35 months	25 to 34 years	No	No	No	No	No
562	31	Female	Parent	Married	Others		Between 60.001 and 100.000FCFA	University	Mendong	mendong	Yes	Yes	Yes	No	No	Yes	No											27	Girl	Mother		Yes	9	Yes	15	Yes	2021-12-15	2022-09-16	2023-03-17	9	15	24 to 35 months	25 to 34 years	No	No	No	No	No
563	36	Female	Parent	Unmarried	Others		Between 60.001 and 100.000FCFA	University	Mendong	mendong	No	No							No	Yes	Yes	Yes	No	No	No	No		14	Boy	Mother		No										12 to 23 months	>= 35 years				Yes	Yes
564	24	Female	Guadian	Unmarried	Others		less than 60.000FCFA	Secondary	Mendong	mendong	Yes	No							No	Yes	Yes	Yes	No	No	No	No		21	Girl	Aunt		I don't know		I don't know		No						12 to 23 months	<= 24 years				No	No
565	34	Female	Parent	Unmarried	Others		I don't know	Primary	Mendong	mendong	No	No							No	No	No	Yes	No	No	No	No		17	Boy	Mother		No										12 to 23 months	25 to 34 years				Yes	Yes
566	41	Female	Guadian	Unmarried	Others		Between 60.001 and 100.000FCFA	University	Mendong	mendong	Yes	Yes	Yes	No	No	Yes	No											28	Girl	Father		Yes	0	I don't know		Yes	2021-11-21	2022-08-26	2023-05-03	9	17	24 to 35 months	>= 35 years	No	No	No	No	No
567	30	Female	Parent	Unmarried	Others		Between 60.001 and 100.000FCFA	Secondary	Mendong	mendong	Yes	Yes	Yes	No	Yes	No	No											22	Boy	Mother		Yes	8	No		No						12 to 23 months	25 to 34 years				No	No
568	35	Female	Parent	Unmarried	Housekeeper		less than 60.000FCFA	Primary	Mendong	mendong	No	No							No	Yes	No	No	No	No	No	No		16	Girl	Mother		No										12 to 23 months	>= 35 years				Yes	Yes
569	36	Female	Parent	Unmarried	Others		Between 60.001 and 100.000FCFA	Secondary	Mendong	mendong	Yes	Yes	Yes	Yes	No	Yes	No											28	Girl	Mother		Yes	6	Yes	15	No						24 to 35 months	>= 35 years				No	No
570	25	Male	Parent	Unmarried	Others		Between 60.001 and 100.000FCFA	University	Mendong	mendong	Yes	Yes	No	Yes	No	No	No											19	Girl	Father		Yes	7	Yes	15	No						12 to 23 months	25 to 34 years				No	No
571	29	Male	Guadian	Unmarried	Others		less than 60.000FCFA	Secondary	Mendong	mendong	Yes	Yes	No	Yes	No	No	No											14	Girl	Cousine		Yes	0	No		Yes	2023-01-12	2023-10-16		9		12 to 23 months	25 to 34 years	No		No	No	No
572	28	Female	Parent	Unmarried	Housekeeper		Between 60.001 and 100.000FCFA	Secondary	Mendong	mendong	No	No							Yes	Yes	No	No	No	No	No	No		30	Boy	Mother		No										24 to 35 months	25 to 34 years				Yes	Yes
573	37	Male	Parent	Married	Others		Between 60.001 and 100.000FCFA	Secondary	Mendong	mendong	Yes	Yes	Yes	No	No	No	No											18	Girl	Father		Yes	11	No		Yes	2022-09-16	2023-08-04		10		12 to 23 months	>= 35 years	Yes		Yes	No	Yes
574	42	Female	Parent	Married	Others		Between 60.001 and 100.000FCFA	University	Mendong	mendong	Yes	Yes	Yes	No	No	No	No											22	Girl	Mother		Yes	9	Yes	15	Yes	2022-05-01	2023-02-03	2023-08-04	9	15	12 to 23 months	>= 35 years	No	No	No	No	No
575	23	Female	Parent	Unmarried	Housekeeper		less than 60.000FCFA	Primary	Mendong	mendong	Yes	Yes	Yes	No	No	No	No											31	Girl	Mother		Yes	6	I don't know		No						24 to 35 months	<= 24 years				No	No
576	18	Female	Parent	Unmarried	Others		I don't know	Secondary	Mendong	mendong	Yes	Yes	Yes	No	No	No	No											12	Boy	Mother		Yes	10	No		Yes	2023-03-13	2023-12-19		9		12 to 23 months	<= 24 years	No		No	No	No
577	32	Male	Parent	Married	Others		Between 100.001 and 300.000FCFA	University	Mendong	mendong	Yes	No							Yes	No	Yes	Yes	No	No	No	No		28	Girl	Father		No										24 to 35 months	25 to 34 years				No	No
578	26	Female	Parent	Unmarried	Others		less than 60.000FCFA	Secondary	Mendong	mendong	Yes	Yes	Yes	No	No	Yes	No											13	Boy	Mother		Yes	9	No		Yes	2023-01-18	2023-10-20		9		12 to 23 months	25 to 34 years	No		No	No	No
579	22	Female	Parent	Unmarried	Others		I don't know	Secondary	Mendong	mendong	Yes	Yes	Yes	Yes	Yes	Yes	No											32	Boy	Father		Yes	9	Yes	15	No						24 to 35 months	<= 24 years				No	No
580	42	Female	Parent	Married	Others		Between 100.001 and 300.000FCFA	University	Mendong	mendong	Yes	Yes	No	Yes	Yes	Yes	No											18	Girl	Mother		Yes	0	Yes	16	Yes	2022-09-22	2023-07-03	2024-01-05	9	15	12 to 23 months	>= 35 years	No	No	No	No	No
581	29	Female	Parent	Unmarried	Others		less than 60.000FCFA	Secondary	Mendong	mendong	Yes	Yes	Yes	Yes	Yes	Yes	No											24	Girl	Mother		Yes	9	No		Yes	2022-03-17	2022-12-23		9		24 to 35 months	25 to 34 years	No		No	No	No
582	48	Female	Guadian	Married	Others		Between 100.001 and 300.000FCFA	Secondary	Mendong	mendong	Yes	Yes	Yes	No	No	No	No											18	Boy	Mother		Yes	0	Yes	0	No						12 to 23 months	>= 35 years				No	No
583	37	Female	Guadian	Unmarried	Others		Between 60.001 and 100.000FCFA	University	Mendong	mendong	Yes	Yes	Yes	No	Yes	Yes	No											17	Girl	Mother		Yes	16	No		No						12 to 23 months	>= 35 years				No	No
584	32	Female	Guadian	Unmarried	Others		less than 60.000FCFA	Secondary	Mendong	mendong	Yes	Yes	Yes	Yes	Yes	No	No											25	Boy	Mother		Yes	0	Yes	0	Yes	2022-02-02	2022-11-04	2023-07-07	9	17	24 to 35 months	25 to 34 years	No	No	No	No	No
585	34	Female	Parent	Married	Others		Between 100.001 and 300.000FCFA	University	Mendong	mendong	Yes	Yes	Yes	Yes	No	Yes	No											18	Girl	Aunt		Yes	10	Yes	15	Yes	2022-09-02	2023-07-07	2023-12-08	10	15	12 to 23 months	25 to 34 years	Yes	No	Yes	No	Yes
586	23	Female	Parent	Unmarried	Housekeeper		less than 60.000FCFA	Secondary	Mendong	mendong	Yes	Yes	Yes	Yes	No	Yes	No											14	Boy	Sister		No										12 to 23 months	<= 24 years				No	No
587	36	Female	Parent	Unmarried	Others		Between 60.001 and 100.000FCFA	Primary	Mendong	mendong	No	No							No	Yes	No	Yes	No	No	No	No		27	Girl	Mother		No										24 to 35 months	>= 35 years				Yes	Yes
588	29	Female	Parent	Unmarried	Housekeeper		less than 60.000FCFA	Secondary	Mendong	mendong	No	Yes	Yes	No	No	No	No											19	Boy	Mother		No										12 to 23 months	25 to 34 years				No	No
589	31	Female	Parent	Married	Others		less than 60.000FCFA	Secondary	Mendong	mendong	Yes	Yes	Yes	Yes	Yes	Yes	No											22	Girl	Mother		Yes	9	Yes	16	Yes	2022-05-25	2023-03-03	2023-08-25	9	15	12 to 23 months	25 to 34 years	No	No	No	No	No
590	49	Female	Parent	Unmarried	Others		Between 60.001 and 100.000FCFA	Secondary	Mendong	mendong	Yes	Yes	Yes	No	No	Yes	No											15	Girl	Mother		Yes	9	No		Yes	2022-12-07	2023-09-08		9		12 to 23 months	>= 35 years	No		No	No	No
591	27	Female	Parent	Unmarried	Others		Between 100.001 and 300.000FCFA	University	Mendong	mendong	Yes	Yes	No	Yes	Yes	Yes	No											33	Boy	Mother		Yes	9	Yes	17	Yes	2021-06-17	2022-03-25	2022-11-04	9	16	24 to 35 months	25 to 34 years	No	No	No	No	No
592	49	Female	Guadian	Married	Others		Between 60.001 and 100.000FCFA	University	Mendong	mendong	Yes	Yes	Yes	No	No	Yes	No											14	Boy	Cousine		Yes	9	No		Yes	2023-01-01	2023-10-06		9		12 to 23 months	>= 35 years	No		No	No	No
593	28	Female	Guadian	Unmarried	Housekeeper		Between 60.001 and 100.000FCFA	University	Mendong	mendong	Yes	Yes	No	No	Yes	No	No											34	Boy	Mother		Yes	0	No		Yes	2021-05-23	2022-03-04		9		24 to 35 months	25 to 34 years	No		No	No	No
594	33	Male	Guadian	Unmarried	Others		Between 100.001 and 300.000FCFA	Secondary	Mendong	mendong	Yes	Yes	Yes	No	No	Yes	No											34	Boy	Father		I don't know		I don't know		Yes	2021-05-13	2022-02-18	2022-09-02	9	15	24 to 35 months	25 to 34 years	No	No	No	No	No
595	29	Female	Parent	Unmarried	Others		less than 60.000FCFA	University	Mendong	mendong	Yes	Yes	Yes	No	No	No	No											24	Girl	Aunt		Yes	0	No		Yes	2022-03-07	2022-12-09		9		24 to 35 months	25 to 34 years	No		No	No	No
596	32	Male	Guadian	Unmarried	Others		Between 60.001 and 100.000FCFA	University	Mendong	mendong	Yes	Yes	No	No	No	Yes	No											13	Boy	Mother		Yes	0	No		Yes	2023-02-08	2023-11-17		9		12 to 23 months	25 to 34 years	No		No	No	No
597	27	Female	Parent	Unmarried	Housekeeper		less than 60.000FCFA	Secondary	Mendong	mendong	Yes	Yes	Yes	No	No	No	No											14	Girl	Cousine		Yes	10	No		Yes	2023-01-02	2023-11-03		10		12 to 23 months	25 to 34 years	Yes		Yes	No	Yes
598	24	Female	Parent	Married	Housekeeper		Between 100.001 and 300.000FCFA	University	Mendong	mendong	Yes	Yes	No	No	No	Yes	No											31	Boy	Mother		Yes	0	Yes	0	No						24 to 35 months	<= 24 years				No	No
599	63	Female	Guadian	Married	Others		Between 60.001 and 100.000FCFA	Primary	Mendong	mendong	No	No							No	Yes	Yes	Yes	No	No	No	Yes	nous avons bien vecu syears ces choses l!	21	Girl	Mother		I don't know		I don't know		No						12 to 23 months	>= 35 years				Yes	Yes
600	44	Female	Parent	Unmarried	Others		Between 100.001 and 300.000FCFA	University	Mendong	mendong	Yes	Yes	Yes	No	No	No	No											32	Girl	Mother		Yes	9	Yes	16	Yes	2021-07-10	2022-04-15	2022-11-18	9	16	24 to 35 months	>= 35 years	No	No	No	No	No
601	25	Female	Guadian	Unmarried	Housekeeper		less than 60.000FCFA	Secondary	Mendong	mendong	Yes	Yes	Yes	Yes	Yes	No	No											23	Girl	Mother		Yes	9	No		Yes	2022-04-13	2023-01-13		9		12 to 23 months	25 to 34 years	No		No	No	No
602	48	Female	Guadian	Unmarried	Housekeeper		Between 60.001 and 100.000FCFA	Secondary	Mendong	mendong	Yes	Yes	Yes	Yes	No	Yes	No											32	Boy	Mother		Yes	12	Yes	15	No						24 to 35 months	>= 35 years				No	No
603	29	Male	Guadian	Unmarried	Others		Between 60.001 and 100.000FCFA	University	Mendong	mendong	Yes	Yes	No	Yes	No	Yes	No											27	Girl	Father		Yes	9	No		Yes	2021-12-23	2022-09-30		9		24 to 35 months	25 to 34 years	No		No	No	No
604	18	Female	Parent	Unmarried	Others		I don't know	Secondary	Mendong	mendong	Yes	Yes	No	No	No	Yes	No											20	Girl	Mother		Yes	6	I don't know		No						12 to 23 months	<= 24 years				No	No
605	40	Male	Parent	Married	Others		Between 60.001 and 100.000FCFA	University	Mendong	mendong	Yes	Yes	No	No	No	Yes	No											16	Girl	Mother		I don't know		I don't know		Yes	2022-11-11	2023-08-11	2024-02-16	9	15	12 to 23 months	>= 35 years	No	No	No	No	No
606	38	Female	Parent	Married	Housekeeper		Between 60.001 and 100.000FCFA	Secondary	Mendong	mendong	Yes	Yes	No	No	Yes	No	No											30	Boy	Mother		Yes	6	No		Yes	2021-08-28	2022-06-03		9		24 to 35 months	>= 35 years	No		No	No	No
607	61	Male	Guadian	Unmarried	Others		Between 60.001 and 100.000FCFA	University	Mendong	mendong	Yes	No							No	No	No	No	Yes	No	No	No		14	Girl	Mother		I don't know		I don't know		No						12 to 23 months	>= 35 years				No	No
608	53	Male	Parent	Married	Others		Between 100.001 and 300.000FCFA	Secondary	Mendong	mendong	Yes	Yes	Yes	No	No	Yes	No											22	Girl	Uncle		I don't know		I don't know		No						12 to 23 months	>= 35 years				No	No
609	25	Female	Guadian	Unmarried	Housekeeper		I don't know	Primary	Mendong	mendong	Yes	Yes	No	No	Yes	Yes	No											13	Boy	Others	menagere	Yes	0	No		Yes	2023-02-19	2023-11-22		9		12 to 23 months	25 to 34 years	No		No	No	No
610	48	Female	Guadian	Unmarried	Others		Between 60.001 and 100.000FCFA	University	Mendong	mendong	Yes	Yes	No	No	No	Yes	No											32	Girl	Mother		Yes	10	Yes	15	Yes	2021-07-21	2022-05-27	2022-11-04	10	15	24 to 35 months	>= 35 years	Yes	No	Yes	No	Yes
611	53	Male	Guadian	Unmarried	Others		less than 60.000FCFA	Secondary	Mendong	mendong	Yes	Yes	Yes	No	Yes	No	No											14	Girl	Aunt		I don't know		I don't know		No						12 to 23 months	>= 35 years				No	No
612	34	Female	Parent	Unmarried	Others		Between 60.001 and 100.000FCFA	University	Mendong	mendong	Yes	Yes	Yes	No	No	Yes	No											13	Girl	Mother		Yes	9	No		Yes	2023-02-08	2023-11-10		9		12 to 23 months	25 to 34 years	No		No	No	No
613	27	Female	Parent	Unmarried	Others		less than 60.000FCFA	University	Mendong	mendong	Yes	Yes	Yes	Yes	No	Yes	No											20	Boy	Father		Yes	6	No		Yes	2022-07-13	2023-04-14		9		12 to 23 months	25 to 34 years	No		No	No	No
614	16	Male	Guadian	Unmarried	Others	Student	I don't know	Secondary	Mendong	mendong	No	No							No	Yes	Yes	Yes	No	No	No	No		25	Girl	Mother		I don't know		I don't know		Yes	2022-02-08	2022-11-11	2023-05-12	9	15	24 to 35 months	<= 24 years	No	No	No	Yes	Yes
615	27	Female	Parent	Unmarried	Others		less than 60.000FCFA	Primary	Mendong	mendong	No	No							Yes	Yes	Yes	No	No	No	No	No		29	Boy	Mother		No										24 to 35 months	25 to 34 years				Yes	Yes
616	24	Male	Parent	Unmarried	Others		Between 60.001 and 100.000FCFA	Secondary	Mendong	mendong	Yes	Yes	No	Yes	No	Yes	No											17	Boy	Others	grand Mother	Yes	0	Yes	0	Yes	2022-10-12	2023-07-14	2024-01-19	9	15	12 to 23 months	<= 24 years	No	No	No	No	No
617	39	Female	Parent	Unmarried	Others		Between 60.001 and 100.000FCFA	Secondary	Mendong	mendong	Yes	Yes	No	No	No	Yes	No											32	Girl	Aunt		I don't know		I don't know		No						24 to 35 months	>= 35 years				No	No
618	35	Male	Parent	Unmarried	Housekeeper		I don't know	Secondary	Mendong	mendong	Yes	Yes	No	No	No	Yes	No											23	Girl	Others		I don't know		I don't know		No						12 to 23 months	>= 35 years				No	No
619	39	Male	Parent	Married	Others		Between 60.001 and 100.000FCFA	University	Mendong	mendong	Yes	Yes	Yes	Yes	Yes	Yes	No											14	Girl	Father		Yes	9	No		Yes	2023-01-18	2023-10-20		9		12 to 23 months	>= 35 years	No		No	No	No
620	35	Female	Parent	Unmarried	Others		Between 60.001 and 100.000FCFA	Secondary	Mendong	mendong	Yes	Yes	Yes	No	No	Yes	No											16	Girl	Mother		Yes	9	Yes	15	Yes	2022-11-20	2023-11-21	2024-03-08	12	15	12 to 23 months	>= 35 years	Yes	No	Yes	No	Yes
621	34	Male	Parent	Married	Others		less than 60.000FCFA	Secondary	Mendong	mendong	Yes	Yes	Yes	No	No	Yes	No											24	Girl	Father		I don't know		I don't know		No						24 to 35 months	25 to 34 years				No	No
622	19	Female	Parent	Unmarried	Others		I don't know	Primary	Mendong	mendong	Yes	Yes	Yes	No	No	No	No											23	Girl	Mother		Yes	9	Yes	15	No						12 to 23 months	<= 24 years				No	No
623	23	Female	Parent	Unmarried	Others		less than 60.000FCFA	University	Mendong	mendong	Yes	Yes	No	No	No	Yes	No											17	Boy	Mother		Yes	9	No		Yes	2022-10-09	2023-07-14		9		12 to 23 months	<= 24 years	No		No	No	No
624	34	Female	Parent	Unmarried	Others		less than 60.000FCFA	Primary	Mendong	mendong	Yes	Yes	No	No	No	Yes	No											15	Girl	Mother		Yes	9	No		Yes	2022-12-16	2023-10-06		9		12 to 23 months	25 to 34 years	No		No	No	No
625	36	Female	Parent	Married	Others		Between 100.001 and 300.000FCFA	University	Mendong	mendong	Yes	Yes	Yes	No	No	Yes	No											19	Boy	Mother		Yes	0	No		No						12 to 23 months	>= 35 years				No	No
626	25	Female	Parent	Married	Others		Between 100.001 and 300.000FCFA	Secondary	Mendong	mendong	Yes	Yes	Yes	No	No	Yes	No											16	Girl	Mother		No										12 to 23 months	25 to 34 years				No	No
627	28	Female	Parent	Unmarried	Others		Between 60.001 and 100.000FCFA	Secondary	Mendong	mendong	Yes	Yes	Yes	No	No	Yes	No											12	Boy	Mother		No										12 to 23 months	25 to 34 years				No	No
628	24	Female	Parent	Unmarried	Others		less than 60.000FCFA	Secondary	Mendong	mendong	Yes	No							No	Yes	Yes	No	No	Yes	No	No		22	Boy	Mother		No										12 to 23 months	<= 24 years				No	No
629	27	Female	Parent	Married	Others		Between 100.001 and 300.000FCFA	University	Mendong	mendong	Yes	Yes	Yes	Yes	Yes	Yes	No											22	Boy	Mother		Yes	9	Yes	15	Yes	2022-05-03	2023-02-10	2023-08-11	9	15	12 to 23 months	25 to 34 years	No	No	No	No	No
630	31	Female	Guadian	Married	Others		Between 60.001 and 100.000FCFA	Secondary	Mendong	mendong	No	No							No	No	No	No	No	No	No	Yes	je suis totalement contre le vaccin	24	Boy	Aunt		No										24 to 35 months	25 to 34 years				Yes	Yes
631	38	Male	Guadian	Married	Others		Between 60.001 and 100.000FCFA	Secondary	Mendong	mendong	No	No							No	No	No	Yes	No	No	No	No		20	Boy	Mother		No										12 to 23 months	>= 35 years				Yes	Yes
632	19	Female	Parent	Unmarried	Others		I don't know	Primary	Mendong	mendong	Yes	Yes	Yes	No	No	Yes	No											26	Boy	Mother		Yes	9	Yes	15	Yes	2022-01-20	2022-11-25	2023-07-07	10	17	24 to 35 months	<= 24 years	Yes	No	Yes	No	Yes
633	31	Female	Parent	Married	Housekeeper		less than 60.000FCFA	Secondary	Mendong	mendong	Yes	Yes	Yes	No	No	No	No											19	Girl	Mother		Yes	9	Yes	15	Yes	2022-08-22	2023-05-26	2023-12-01	9	15	12 to 23 months	25 to 34 years	No	No	No	No	No
634	26	Female	Parent	Unmarried	Housekeeper		less than 60.000FCFA	Primary	Mendong	mendong	No	No							Yes	No	No	No	No	No	No	No		18	Boy	Mother		I don't know		I don't know		No						12 to 23 months	25 to 34 years				Yes	Yes
635	38	Female	Guadian	Married	Others		Between 60.001 and 100.000FCFA	Secondary	Mendong	mendong	Yes	Yes	Yes	No	No	No	No											13	Boy	Uncle		Yes	6	No		No						12 to 23 months	>= 35 years				No	No
636	32	Female	Parent	Unmarried	Others		less than 60.000FCFA	Secondary	Mendong	mendong	Yes	Yes	No	No	No	Yes	No											30	Girl	Mother		Yes	9	No		No						24 to 35 months	25 to 34 years				No	No
637	24	Female	Parent	Unmarried	Others		less than 60.000FCFA	Secondary	Mendong	mendong	Yes	Yes	No	No	No	Yes	No											28	Girl	Mother		Yes	0	Yes	0	Yes	2021-11-04	2022-08-05	2023-02-10	9	15	24 to 35 months	<= 24 years	No	No	No	No	No
638	20	Female	Guadian	Unmarried	Others	Student	less than 60.000FCFA	University	Akok-Ndoe	ASEC	Yes	Yes	No	No	No	Yes	No											18	Boy	Mother		Yes	9	Yes	15	Yes	2022-09-09	2023-06-09	2024-01-12	9	16	12 to 23 months	<= 24 years	No	No	No	No	No
639	31	Male	Guadian	Unmarried	Others		less than 60.000FCFA	University	Akok-Ndoe	LAMPADAIRE	No	No							Yes	No	No	No	No	No	No	No		22	Girl	Mother		No										12 to 23 months	25 to 34 years				Yes	Yes
640	28	Female	Parent	Unmarried	Others		less than 60.000FCFA	Secondary	Akok-Ndoe	LAMPADAIRE	Yes	Yes	No	No	No	Yes	No											19	Boy	Mother		Yes	9	No		Yes	2022-07-31	2023-07-07		11		12 to 23 months	25 to 34 years	Yes		Yes	No	Yes
641	23	Female	Parent	Married	Others		less than 60.000FCFA	None	Akok-Ndoe	ZONE NOBLESSE	Yes	Yes	Yes	No	No	No	No											12	Boy	Mother		No										12 to 23 months	<= 24 years				No	No
642	26	Female	Parent	Married	Housekeeper		less than 60.000FCFA	Secondary	Akok-Ndoe	LAMPADAIRE	Yes	Yes	Yes	No	No	No	No											22	Girl	Mother		Yes	0	Yes	0	Yes	2022-05-06	2023-03-10	2023-11-10	10	18	12 to 23 months	25 to 34 years	Yes	No	Yes	No	Yes
643	28	Female	Parent	Married	Others		less than 60.000FCFA	Secondary	Akok-Ndoe	LAMPADAIRE	Yes	Yes	Yes	No	No	Yes	No											12	Boy	Mother		Yes	9	No		Yes	2023-03-14	2023-12-22		9		12 to 23 months	25 to 34 years	No		No	No	No
644	30	Female	Parent	Married	Housekeeper		less than 60.000FCFA	Secondary	Akok-Ndoe	LAMPADAIRE	Yes	Yes	No	No	No	Yes	No											19	Boy	Mother		Yes	9	No		Yes	2022-08-07	2023-05-19		9		12 to 23 months	25 to 34 years	No		No	No	No
645	30	Female	Parent	Married	Others		Between 60.001 and 100.000FCFA	University	Akok-Ndoe	LAMPADAIRE	Yes	Yes	Yes	No	No	Yes	No											16	Girl	Mother		Yes	9	Yes	15	Yes	2022-11-22	2023-09-01	2024-04-16	9	16	12 to 23 months	25 to 34 years	No	No	No	No	No
646	23	Female	Parent	Unmarried	Others		less than 60.000FCFA	Secondary	Akok-Ndoe	LAMPADAIRE	Yes	Yes	No	No	No	Yes	No											14	Boy	Mother		No										12 to 23 months	<= 24 years				No	No
647	29	Female	Parent	Married	Others		less than 60.000FCFA	Secondary	Akok-Ndoe	LAMPADAIRE	Yes	Yes	Yes	Yes	No	Yes	No											26	Girl	Mother		Yes	9	Yes	16	Yes	2022-01-31	2022-11-01	2023-06-02	9	16	24 to 35 months	25 to 34 years	No	No	No	No	No
648	32	Female	Parent	Married	Others		less than 60.000FCFA	University	Akok-Ndoe	LAMPADAIRE	Yes	Yes	No	No	No	Yes	No											15	Girl	Mother		Yes	9	No		Yes	2022-12-31	2023-10-06		9		12 to 23 months	25 to 34 years	No		No	No	No
649	26	Female	Parent	Unmarried	Housekeeper		Between 60.001 and 100.000FCFA	Secondary	Akok-Ndoe	CHEFFERIE	Yes	Yes	No	No	No	Yes	No											18	Girl	Mother		Yes	9	Yes	15	Yes	2022-11-23	2023-08-25	2024-02-27	9	15	12 to 23 months	25 to 34 years	No	No	No	No	No
650	48	Female	Guadian	Married	Others		I don't know	University	Akok-Ndoe	AKOK-NDOE	Yes	Yes	Yes	Yes	No	Yes	No											34	Boy	Others	grand Mother	Yes	10	Yes	18	No						24 to 35 months	>= 35 years				No	No
651	33	Female	Parent	Married	Housekeeper		I don't know	Secondary	Akok-Ndoe	AKOK-NDOE	Yes	Yes	Yes	No	No	No	No											14	Boy	Mother		Yes	10	No		Yes	2022-12-26	2023-10-28		10		12 to 23 months	25 to 34 years	Yes		Yes	No	Yes
652	32	Female	Parent	Unmarried	Others		less than 60.000FCFA	Secondary	Akok-Ndoe	AKOK-NDOE	Yes	Yes	No	No	No	Yes	No											30	Boy	Mother		Yes	9	Yes	15	Yes	2021-09-02	2022-07-15	2023-01-20	10	16	24 to 35 months	25 to 34 years	Yes	No	Yes	No	Yes
653	26	Female	Parent	Unmarried	Housekeeper		I don't know	Secondary	Akok-Ndoe	AKOK-NDOE	Yes	Yes	No	No	No	Yes	No											12	Boy	Mother		Yes	10	No		Yes	2023-03-04	2024-02-09		11		12 to 23 months	25 to 34 years	Yes		Yes	No	Yes
654	36	Female	Parent	Married	Housekeeper		I don't know	Secondary	Akok-Ndoe	AKOK-NDOE	Yes	Yes	No	No	No	Yes	No											24	Boy	Mother		Yes	9	Yes	17	Yes	2022-03-09	2023-01-04	2023-08-10	9	17	24 to 35 months	>= 35 years	No	No	No	No	No
655	33	Female	Parent	Married	Housekeeper		Between 60.001 and 100.000FCFA	University	Akok-Ndoe	AKOK-NDOE	Yes	Yes	Yes	No	No	No	No											13	Girl	Mother		Yes	10	No		Yes	2023-02-12	2024-01-03		10		12 to 23 months	25 to 34 years	Yes		Yes	No	Yes
656	22	Female	Parent	Unmarried	Others		Between 60.001 and 100.000FCFA	University	Akok-Ndoe	AKOK-NDOE 1	Yes	Yes	No	No	No	Yes	No											26	Girl	Mother		Yes	10	Yes	18	Yes	2021-12-27	2022-11-02	2023-07-06	10	18	24 to 35 months	<= 24 years	Yes	No	Yes	No	Yes
657	29	Female	Parent	Married	Others		Between 60.001 and 100.000FCFA	Secondary	Akok-Ndoe	AKOK-NDOE 1	Yes	Yes	No	No	No	Yes	No											16	Girl	Mother		Yes	9	No		Yes	2022-11-07	2023-08-11		9		12 to 23 months	25 to 34 years	No		No	No	No
658	43	Female	Parent	Married	Others		less than 60.000FCFA	University	Akok-Ndoe	AKOK-NDOE	Yes	Yes	No	No	No	Yes	No											12	Boy	Father		Yes	9	No		No						12 to 23 months	>= 35 years				No	No
659	30	Female	Parent	Married	Others		less than 60.000FCFA	Secondary	Akok-Ndoe	CHEFFERIE	Yes	Yes	Yes	No	No	No	No											15	Boy	Mother		Yes	0	No		Yes	2022-12-21	2023-09-22		9		12 to 23 months	25 to 34 years	No		No	No	No
660	28	Female	Parent	Unmarried	Others		Between 60.001 and 100.000FCFA	Secondary	Akok-Ndoe	AKOK-NDOE	Yes	Yes	Yes	No	No	No	No											28	Boy	Mother		Yes	11	Yes	15	No						24 to 35 months	25 to 34 years				No	No
661	25	Female	Parent	Unmarried	Others		less than 60.000FCFA	Secondary	Akok-Ndoe	AKOK-NDOE	Yes	Yes	No	No	No	Yes	No											33	Boy	Mother		Yes	10	Yes	16	No						24 to 35 months	25 to 34 years				No	No
662	40	Female	Parent	Married	Others		Between 60.001 and 100.000FCFA	University	Akok-Ndoe	AKOK-NDOE	Yes	Yes	No	No	No	Yes	No											24	Girl	Mother		Yes	9	Yes	15	No						24 to 35 months	>= 35 years				No	No
663	23	Female	Parent	Unmarried	Housekeeper		less than 60.000FCFA	Secondary	Akok-Ndoe	AKOK-NDOE	Yes	Yes	No	No	No	Yes	No											15	Boy	Mother		Yes	9	No		Yes	2022-12-06	2023-10-06		10		12 to 23 months	<= 24 years	Yes		Yes	No	Yes
664	40	Female	Parent	Married	Others		Between 100.001 and 300.000FCFA	University	Akok-Ndoe	AKOK-NDOE	Yes	Yes	No	No	No	Yes	No											25	Girl	Mother		No										24 to 35 months	>= 35 years				No	No
665	29	Female	Parent	Married	Housekeeper		I don't know	Secondary	Akok-Ndoe	AKOK-NDOE	Yes	Yes	No	No	No	Yes	No											15	Girl	Mother		Yes	9	Yes	15	Yes	2022-12-08	2023-09-08	2024-03-13	9	15	12 to 23 months	25 to 34 years	No	No	No	No	No
666	26	Female	Parent	Unmarried	Housekeeper		I don't know	Secondary	Akok-Ndoe	CHEFFERIE	Yes	Yes	No	No	No	Yes	No											12	Boy	Mother		Yes	10	No		Yes	2023-03-06	2024-02-09		11		12 to 23 months	25 to 34 years	Yes		Yes	No	Yes
667	28	Female	Parent	Married	Housekeeper		Between 60.001 and 100.000FCFA	Secondary	Akok-Ndoe	CHEFFERIE	Yes	Yes	Yes	Yes	No	Yes	No											21	Boy	Mother		Yes	9	No		Yes	2022-11-08	2023-08-11		9		12 to 23 months	25 to 34 years	No		No	No	No
668	26	Female	Parent	Unmarried	Others		less than 60.000FCFA	Secondary	Akok-Ndoe	CHEFFERIE	Yes	Yes	Yes	No	No	Yes	No											26	Girl	Mother		I don't know		I don't know		No						24 to 35 months	25 to 34 years				No	No
669	25	Female	Parent	Unmarried	Others		Between 60.001 and 100.000FCFA	Secondary	Akok-Ndoe	CHEFFERIE	Yes	Yes	No	No	No	Yes	No											18	Boy	Mother		Yes	9	No		Yes	2022-09-23	2023-06-30		9		12 to 23 months	25 to 34 years	No		No	No	No
670	30	Female	Parent	Married	Housekeeper		less than 60.000FCFA	Primary	Akok-Ndoe	CHEFFERIE	Yes	Yes	No	No	No	Yes	No											26	Boy	Mother		Yes	9	No		Yes	2022-02-01	2022-11-04		9		24 to 35 months	25 to 34 years	No		No	No	No
671	30	Female	Parent	Unmarried	Others		less than 60.000FCFA	Secondary	Akok-Ndoe	CHEFFERIE	Yes	Yes	Yes	No	No	No	No											29	Boy	Mother		Yes	9	Yes	15	No						24 to 35 months	25 to 34 years				No	No
672	34	Female	Parent	Unmarried	Others		Between 60.001 and 100.000FCFA	Secondary	Akok-Ndoe	CHEFFERIE	Yes	Yes	No	No	No	Yes	No											17	Boy	Mother		Yes	9	Yes	15	No						12 to 23 months	25 to 34 years				No	No
673	30	Female	Parent	Married	Housekeeper		Between 100.001 and 300.000FCFA	University	Akok-Ndoe	CHEFFERIE	Yes	Yes	Yes	No	No	No	No											15	Boy	Mother		Yes	9	Yes	15	Yes	2022-09-09	2023-06-09	2023-12-15	9	15	12 to 23 months	25 to 34 years	No	No	No	No	No
674	40	Female	Parent	Married	Others		less than 60.000FCFA	University	Akok-Ndoe	ASEC	Yes	Yes	No	No	No	Yes	No											18	Girl	Mother		Yes	9	Yes	15	Yes	2022-09-20	2023-06-23	2024-03-01	9	17	12 to 23 months	>= 35 years	No	No	No	No	No
675	33	Female	Parent	Married	Others		less than 60.000FCFA	Primary	Akok-Ndoe	ASEC	Yes	Yes	No	No	No	Yes	No											13	Girl	Mother		Yes	9	No		Yes	2023-02-09	2023-11-17		9		12 to 23 months	25 to 34 years	No		No	No	No
676	29	Female	Parent	Married	Others		less than 60.000FCFA	Secondary	Akok-Ndoe	ASEC	Yes	Yes	No	No	No	Yes	No											24	Girl	Mother		Yes	9	Yes	15	Yes	2022-03-14	2023-01-27	2023-06-16	10	15	24 to 35 months	25 to 34 years	Yes	No	Yes	No	Yes
677	20	Female	Parent	Unmarried	Others		I don't know	Secondary	Akok-Ndoe	ASEC	Yes	No							Yes	No	No	No	No	No	No	No		18	Girl	Mother		I don't know		No		No						12 to 23 months	<= 24 years				No	No
678	32	Female	Parent	Married	Others		Between 60.001 and 100.000FCFA	University	Akok-Ndoe	ASEC	Yes	Yes	Yes	Yes	No	Yes	No											13	Girl	Mother		Yes	9	No		Yes	2023-02-13	2023-11-17		9		12 to 23 months	25 to 34 years	No		No	No	No
679	29	Female	Parent	Married	Housekeeper		I don't know	Secondary	Akok-Ndoe	ASEC	Yes	Yes	Yes	Yes	No	Yes	No											19	Boy	Mother		Yes	10	Yes	18	No						12 to 23 months	25 to 34 years				No	No
680	36	Female	Parent	Married	Others		More than 300.000FCFA	University	Akok-Ndoe	ASEC	Yes	Yes	No	No	No	Yes	No											13	Boy	Mother		No										12 to 23 months	>= 35 years				No	No
681	28	Female	Parent	Married	Others		Between 60.001 and 100.000FCFA	Secondary	Akok-Ndoe	ASEC	Yes	Yes	No	No	No	Yes	No											19	Boy	Mother		Yes	9	No		Yes	2022-07-22	2023-04-26		9		12 to 23 months	25 to 34 years	No		No	No	No
682	31	Female	Parent	Married	Others		Between 60.001 and 100.000FCFA	Secondary	Akok-Ndoe	ASEC	Yes	Yes	No	No	No	Yes	No											23	Boy	Mother		Yes	9	Yes	15	Yes	2022-05-26	2023-03-03	2023-12-08	9	18	12 to 23 months	25 to 34 years	No	No	No	No	No
683	26	Female	Parent	Married	Housekeeper		less than 60.000FCFA	Secondary	Akok-Ndoe	ZONE NOBLESSE	Yes	Yes	No	No	No	Yes	No											23	Girl	Mother		Yes	9	Yes	15	Yes	2022-02-28	2023-01-13	2023-09-08	10	18	12 to 23 months	25 to 34 years	Yes	No	Yes	No	Yes
684	29	Female	Parent	Married	Others		Between 60.001 and 100.000FCFA	University	Akok-Ndoe	ZONE NOBLESSE	Yes	Yes	No	Yes	No	Yes	No											23	Girl	Mother		Yes	9	No		Yes	2023-04-29	2024-02-02		9		12 to 23 months	25 to 34 years	No		No	No	No
685	32	Female	Parent	Married	Housekeeper		More than 300.000FCFA	Secondary	Akok-Ndoe	ZONE NOBLESSE	Yes	Yes	Yes	No	No	No	No											16	Boy	Mother		Yes	12	No		No						12 to 23 months	25 to 34 years				No	No
686	18	Female	Parent	Unmarried	Others		I don't know	Secondary	Akok-Ndoe	ZONE NOBLESSE	Yes	Yes	No	No	No	Yes	No											18	Boy	Mother		Yes	9	Yes	15	Yes	2022-07-25	2023-05-26	2023-12-01	10	16	12 to 23 months	<= 24 years	Yes	No	Yes	No	Yes
687	38	Female	Parent	Married	Housekeeper		less than 60.000FCFA	Primary	Akok-Ndoe	ZONE NOBLESSE	No	No							No	Yes	No	No	No	No	No	No		28	Boy	Mother		No										24 to 35 months	>= 35 years				Yes	Yes
688	29	Female	Parent	Married	Others		Between 60.001 and 100.000FCFA	Secondary	Akok-Ndoe	ZONE NOBLESSE	Yes	Yes	No	No	No	Yes	No											18	Girl	Mother		Yes	9	Yes	17	No						12 to 23 months	25 to 34 years				No	No
689	25	Female	Parent	Married	Housekeeper		less than 60.000FCFA	Secondary	Akok-Ndoe	ASEC	Yes	Yes	No	No	No	Yes	No											20	Boy	Mother		Yes	11	Yes	19	Yes	2022-07-17	2023-04-21	2023-12-05	9	16	12 to 23 months	25 to 34 years	No	No	No	No	No
690	27	Female	Guadian	Unmarried	Others		less than 60.000FCFA	Secondary	Akok-Ndoe	AKOK-NDOE	No	No							Yes	No	No	No	No	No	No	No		12	Girl	Aunt		No										12 to 23 months	25 to 34 years				Yes	Yes
691	24	Female	Parent	Married	Others		Between 60.001 and 100.000FCFA	Secondary	Akok-Ndoe	AKOK-NDOE 1	Yes	Yes	Yes	No	No	No	No											18	Boy	Mother		Yes	9	I don't know		No						12 to 23 months	<= 24 years				No	No
692	28	Female	Parent	Unmarried	Housekeeper		less than 60.000FCFA	Secondary	Akok-Ndoe	AKOK-NDOE 1	Yes	Yes	No	No	No	Yes	No											30	Girl	Mother		Yes	9	No		Yes	2021-08-31	2022-06-03		9		24 to 35 months	25 to 34 years	No		No	No	No
693	29	Female	Parent	Unmarried	Others		less than 60.000FCFA	Secondary	Akok-Ndoe	AKOK-NDOE 1	Yes	Yes	No	No	No	Yes	No											20	Boy	Mother		Yes	9	No		Yes	2022-07-15	2023-04-21		9		12 to 23 months	25 to 34 years	No		No	No	No
694	24	Female	Parent	Unmarried	Others		less than 60.000FCFA	Secondary	Akok-Ndoe	AKOK-NDOE 1	No	No							Yes	No	No	No	No	No	No	Yes	DON'T EVEN KNOW MEASLES	18	Girl	Mother		No										12 to 23 months	<= 24 years				Yes	Yes
695	50	Female	Guadian	Married	Others		less than 60.000FCFA	Secondary	Akok-Ndoe	KOLEZIE	Yes	Yes	No	No	No	Yes	No											18	Girl	Others	grand Mother	Yes	3	Yes	16	Yes	2022-07-01	2023-04-07	2023-11-03	9	16	12 to 23 months	>= 35 years	No	No	No	No	No
696	24	Female	Parent	Married	Others		less than 60.000FCFA	Secondary	Akok-Ndoe	KOLEZIE	Yes	Yes	No	No	No	Yes	No											14	Boy	Mother		Yes	9	No		Yes	2023-01-13	2023-10-13		9		12 to 23 months	<= 24 years	No		No	No	No
697	33	Female	Parent	Married	Others		Between 60.001 and 100.000FCFA	Secondary	Akok-Ndoe	KOLEZIE	Yes	Yes	Yes	No	No	Yes	No											19	Girl	Mother		Yes	9	No		No						12 to 23 months	25 to 34 years				No	No
698	26	Female	Parent	Married	Others		less than 60.000FCFA	Secondary	Akok-Ndoe	KOLEZIE	Yes	Yes	No	No	No	Yes	No											20	Girl	Mother		Yes	9	Yes	18	No						12 to 23 months	25 to 34 years				No	No
699	29	Female	Parent	Married	Others		Between 60.001 and 100.000FCFA	University	Akok-Ndoe	KOLEZIE	Yes	Yes	No	No	No	Yes	No											17	Boy	Mother		Yes	9	Yes	15	No						12 to 23 months	25 to 34 years				No	No
700	29	Female	Parent	Unmarried	Housekeeper		less than 60.000FCFA	Primary	Akok-Ndoe	KOLEZIE	Yes	Yes	Yes	No	No	No	No											15	Girl	Mother		I don't know		I don't know		No						12 to 23 months	25 to 34 years				No	No
701	31	Female	Guadian	Married	Others		less than 60.000FCFA	Secondary	Akok-Ndoe	KOLEZIE	Yes	Yes	No	No	No	Yes	No											28	Boy	Aunt		Yes	9	Yes	15	Yes	2022-11-19	2023-08-25	2024-03-01	9	15	24 to 35 months	25 to 34 years	No	No	No	No	No
702	27	Female	Parent	Unmarried	Others		less than 60.000FCFA	University	Akok-Ndoe	KOLEZIE	Yes	Yes	No	No	No	Yes	No											29	Girl	Mother		Yes	9	No		No						24 to 35 months	25 to 34 years				No	No
703	26	Female	Parent	Unmarried	Others		Between 60.001 and 100.000FCFA	Secondary	Akok-Ndoe	KOLEZIE	Yes	Yes	Yes	No	No	No	No											13	Girl	Mother		Yes	9	No		Yes	2023-01-31	2023-11-17		9		12 to 23 months	25 to 34 years	No		No	No	No
704	28	Female	Parent	Married	Others		less than 60.000FCFA	Secondary	Akok-Ndoe	MOHOULOU	Yes	Yes	No	No	No	Yes	No											34	Girl	Mother		Yes	9	Yes	15	No						24 to 35 months	25 to 34 years				No	No
705	25	Female	Parent	Unmarried	Others		less than 60.000FCFA	University	Akok-Ndoe	KOLEZIE	Yes	Yes	Yes	No	No	Yes	No											28	Boy	Mother		Yes	9	Yes	15	No						24 to 35 months	25 to 34 years				No	No
706	25	Female	Parent	Unmarried	Housekeeper		less than 60.000FCFA	Secondary	Akok-Ndoe	MOHOULOU	Yes	Yes	Yes	No	No	No	No											35	Boy	Mother		Yes	9	No		Yes	2021-04-29	2022-02-04		9		24 to 35 months	25 to 34 years	No		No	No	No
707	34	Female	Parent	Unmarried	Others		Between 60.001 and 100.000FCFA	University	Akok-Ndoe	MOHOULOU	Yes	Yes	Yes	No	No	No	No											12	Boy	Mother		I don't know		No		Yes	2023-02-05	2023-11-10		9		12 to 23 months	25 to 34 years	No		No	No	No
708	45	Female	Parent	Unmarried	Others		less than 60.000FCFA	Secondary	Akok-Ndoe	MOHOULOU	Yes	Yes	No	No	No	Yes	No											33	Girl	Mother		Yes	12	Yes	22	Yes	2021-11-11	2022-11-11	2023-09-15	12	22	24 to 35 months	>= 35 years	Yes	Yes	Yes	No	Yes
709	25	Male	Parent	Unmarried	Housekeeper		less than 60.000FCFA	Secondary	Akok-Ndoe	MOHOULOU	Yes	Yes	Yes	No	No	No	No											16	Girl	Mother		I don't know		I don't know		No						12 to 23 months	25 to 34 years				No	No
710	23	Female	Parent	Unmarried	Housekeeper		less than 60.000FCFA	Secondary	Akok-Ndoe	MOHOULOU	Yes	Yes	Yes	No	No	No	No											14	Girl	Mother		Yes	9	No		Yes	2023-01-28	2023-11-03		9		12 to 23 months	<= 24 years	No		No	No	No
711	28	Female	Parent	Unmarried	Others		Between 60.001 and 100.000FCFA	Secondary	Akok-Ndoe	MOHOULOU	Yes	Yes	No	Yes	No	No	No											22	Girl	Mother		Yes	9	Yes	18	Yes	2022-05-08	2023-02-10	2023-11-10	9	18	12 to 23 months	25 to 34 years	No	No	No	No	No
712	25	Female	Parent	Unmarried	Others		Between 60.001 and 100.000FCFA	University	Melen	melen	Yes	Yes	No	No	No	Yes	No											12	Girl	Mother		Yes	9	No		Yes	2023-03-26	2024-01-26		10		12 to 23 months	25 to 34 years	Yes		Yes	No	Yes
713	21	Female	Parent	Unmarried	Others		Between 60.001 and 100.000FCFA	Secondary	Melen	melen	Yes	Yes	No	No	No	Yes	No											19	Boy	Mother		Yes	9	Yes	15	Yes	2022-08-27	2023-06-02	2023-11-30	9	15	12 to 23 months	<= 24 years	No	No	No	No	No
714	20	Female	Parent	Unmarried	Housekeeper		Between 60.001 and 100.000FCFA	University	Melen	melen	Yes	Yes	No	No	No	Yes	No											29	Boy	Mother		Yes	9	No		Yes	2021-09-10	2022-07-01		9		24 to 35 months	<= 24 years	No		No	No	No
715	26	Male	Parent	Unmarried	Others		Between 60.001 and 100.000FCFA	University	Melen	melen	Yes	Yes	No	No	No	Yes	No											17	Girl	Mother		Yes	9	Yes	15	Yes	2022-09-18	2023-07-14	2023-12-19	9	15	12 to 23 months	25 to 34 years	No	No	No	No	No
716	30	Female	Parent	Unmarried	Housekeeper		less than 60.000FCFA	Secondary	Melen	melen	Yes	Yes	No	Yes	No	No	No											13	Girl	Mother		Yes	9	No		Yes	2023-02-15	2024-02-19		12		12 to 23 months	25 to 34 years	Yes		Yes	No	Yes
717	27	Female	Parent	Unmarried	Others		Between 60.001 and 100.000FCFA	Secondary	Melen	melen	Yes	Yes	Yes	No	No	No	No											15	Girl	Mother		Yes	9	No		Yes	2022-12-25	2023-09-29		9		12 to 23 months	25 to 34 years	No		No	No	No
718	32	Female	Parent	Married	Others		Between 60.001 and 100.000FCFA	University	Melen	melen	Yes	Yes	Yes	No	No	No	No											16	Girl	Mother		Yes	9	Yes	15	No						12 to 23 months	25 to 34 years				No	No
719	27	Female	Parent	Married	Others		I don't know	Secondary	Melen	melen	Yes	No							No	Yes	Yes	No	No	No	No	No		17	Boy	Mother		No										12 to 23 months	25 to 34 years				No	No
720	36	Female	Parent	Unmarried	Others		less than 60.000FCFA	Secondary	Melen	melen	Yes	Yes	No	Yes	No	No	No											20	Girl	Mother		Yes	9	No		Yes	2022-07-15	2023-04-28		9		12 to 23 months	>= 35 years	No		No	No	No
721	30	Female	Parent	Unmarried	Others		Between 60.001 and 100.000FCFA	University	Melen	melen	No	No							No	Yes	No	No	No	No	No	No		13	Boy	Mother		No										12 to 23 months	25 to 34 years				Yes	Yes
722	30	Female	Parent	Unmarried	Others		less than 60.000FCFA	Secondary	Melen	melen	Yes	Yes	No	No	Yes	No	No											21	Girl	Mother		Yes	9	Yes	15	Yes	2022-06-06	2023-03-15	2023-10-06	9	16	12 to 23 months	25 to 34 years	No	No	No	No	No
723	35	Male	Guadian	Married	Others		less than 60.000FCFA	University	Melen	melen	Yes	Yes	No	Yes	No	No	No											18	Girl	Father		No										12 to 23 months	>= 35 years				No	No
724	42	Female	Parent	Married	Others		less than 60.000FCFA	University	Melen	melen	Yes	Yes	No	No	No	Yes	No											15	Boy	Father		Yes	9	No		Yes	2023-01-05	2023-10-05		9		12 to 23 months	>= 35 years	No		No	No	No
725	30	Female	Parent	Unmarried	Others		Between 60.001 and 100.000FCFA	University	Melen	melen	Yes	Yes	Yes	No	No	No	No											12	Boy	Mother		Yes	9	No		Yes	2023-03-29	2023-12-29		9		12 to 23 months	25 to 34 years	No		No	No	No
726	34	Female	Parent	Married	Others		less than 60.000FCFA	University	Melen	melen	Yes	Yes	Yes	No	No	No	No											17	Girl	Mother		Yes	9	No		Yes	2022-10-18	2023-07-21		9		12 to 23 months	25 to 34 years	No		No	No	No
727	27	Female	Parent	Unmarried	Housekeeper		Between 60.001 and 100.000FCFA	Secondary	Melen	melen	Yes	Yes	No	No	No	Yes	No											20	Boy	Mother		Yes	0	Yes	0	Yes	2022-06-13	2023-03-17	2023-09-22	9	15	12 to 23 months	25 to 34 years	No	No	No	No	No
728	42	Female	Parent	Unmarried	Housekeeper		less than 60.000FCFA	Secondary	Melen	melen	Yes	Yes	Yes	No	No	No	No											12	Girl	Mother		Yes	9	No		Yes	2023-03-06	2024-01-10		10		12 to 23 months	>= 35 years	Yes		Yes	No	Yes
729	37	Female	Parent	Unmarried	Housekeeper		less than 60.000FCFA	Secondary	Melen	melen	Yes	No							Yes	No	No	No	No	No	No	No		18	Girl	Mother		No										12 to 23 months	>= 35 years				No	No
730	25	Female	Parent	Unmarried	Others		I don't know	Secondary	Melen	melen	No	No							No	Yes	No	No	No	No	No	No		15	Girl	Mother		No										12 to 23 months	25 to 34 years				Yes	Yes
731	52	Female	Parent	Married	Others		Between 100.001 and 300.000FCFA	University	Melen	melen	Yes	Yes	No	No	No	Yes	No											14	Girl	Father		Yes	9	No		Yes	2023-01-05	2023-10-18		9		12 to 23 months	>= 35 years	No		No	No	No
732	42	Female	Parent	Married	Others		Between 60.001 and 100.000FCFA	University	Melen	melen	Yes	Yes	No	Yes	No	No	No											13	Girl	Mother		No										12 to 23 months	>= 35 years				No	No
733	19	Female	Parent	Unmarried	Housekeeper		less than 60.000FCFA	Primary	Melen	melen	Yes	No							Yes	No	No	No	No	No	No	No		21	Girl	Mother		Yes	9	Yes	15	Yes	2022-06-16	2023-03-17	2023-09-22	9	15	12 to 23 months	<= 24 years	No	No	No	No	No
734	39	Female	Parent	Married	Others		Between 100.001 and 300.000FCFA	University	Melen	melen	Yes	Yes	No	Yes	No	No	No											17	Girl	Mother		Yes	0	No		Yes	2022-10-12	2023-07-21		9		12 to 23 months	>= 35 years	No		No	No	No
735	31	Female	Parent	Married	Others		Between 60.001 and 100.000FCFA	Secondary	Melen	melen	Yes	Yes	No	Yes	No	No	No											16	Boy	Mother		Yes	9	No		Yes	2022-11-28	2023-09-06		9		12 to 23 months	25 to 34 years	No		No	No	No
736	29	Female	Parent	Married	Others		Between 60.001 and 100.000FCFA	University	Melen	melen	Yes	Yes	Yes	No	No	Yes	No											19	Girl	Mother		Yes	0	No		Yes	2022-08-10	2023-05-19		9		12 to 23 months	25 to 34 years	No		No	No	No
737	21	Female	Parent	Unmarried	Housekeeper		I don't know	Secondary	Melen	melen	Yes	Yes	No	No	No	Yes	No											15	Girl	Mother		Yes	9	Yes	15	Yes	2022-12-18	2023-09-22	2024-03-25	9	15	12 to 23 months	<= 24 years	No	No	No	No	No
738	20	Female	Parent	Unmarried	Others		less than 60.000FCFA	University	Melen	melen	Yes	Yes	Yes	No	No	Yes	No											12	Boy	Mother		I don't know		No		Yes	2023-03-19	2023-12-25		9		12 to 23 months	<= 24 years	No		No	No	No
739	37	Male	Parent	Unmarried	Others		Between 60.001 and 100.000FCFA	Secondary	Melen	melen	Yes	Yes	No	No	Yes	Yes	No											16	Girl	Mother		I don't know		I don't know		Yes	2022-12-26	2023-09-26	2024-04-18	9	15	12 to 23 months	>= 35 years	No	No	No	No	No
740	24	Female	Parent	Unmarried	Housekeeper		I don't know	University	Melen	melen	Yes	Yes	No	No	No	Yes	No											15	Girl	Mother		Yes	9	Yes	15	Yes	2022-12-14	2023-09-19	2024-03-25	9	15	12 to 23 months	<= 24 years	No	No	No	No	No
741	25	Female	Parent	Unmarried	Others		less than 60.000FCFA	University	Melen	melen	Yes	Yes	No	No	No	Yes	No											20	Girl	Mother		Yes	9	No		Yes	2022-07-10	2023-04-14		9		12 to 23 months	25 to 34 years	No		No	No	No
742	28	Female	Parent	Unmarried	Others		Between 60.001 and 100.000FCFA	University	Melen	melen	Yes	No							No	Yes	Yes	No	No	No	No	No		18	Boy	Mother		No										12 to 23 months	25 to 34 years				No	No
743	29	Male	Parent	Unmarried	Others		Between 60.001 and 100.000FCFA	Secondary	Melen	melen	Yes	Yes	Yes	No	No	Yes	No											17	Girl	Mother		Yes	9	No		Yes	2022-10-14	2023-11-21		13		12 to 23 months	25 to 34 years	Yes		Yes	No	Yes
744	33	Female	Parent	Married	Others		Between 60.001 and 100.000FCFA	Secondary	Melen	melen	Yes	Yes	Yes	Yes	No	Yes	No											23	Girl	Mother		Yes	9	Yes	15	Yes	2022-04-07	2023-01-11	2023-08-04	9	15	12 to 23 months	25 to 34 years	No	No	No	No	No
745	26	Female	Parent	Unmarried	Others		Between 60.001 and 100.000FCFA	Secondary	Melen	melen	Yes	Yes	Yes	No	No	No	No											16	Boy	Mother		Yes	9	No		Yes	2022-11-15	2023-09-08		9		12 to 23 months	25 to 34 years	No		No	No	No
746	32	Female	Parent	Unmarried	Housekeeper		I don't know	Secondary	Melen	melen	Yes	Yes	No	Yes	No	Yes	No											21	Girl	Mother		No										12 to 23 months	25 to 34 years				No	No
747	41	Female	Parent	Unmarried	Others		less than 60.000FCFA	Secondary	Melen	melen	Yes	Yes	No	No	No	Yes	No											18	Girl	Mother		Yes	9	No		No						12 to 23 months	>= 35 years				No	No
748	27	Female	Parent	Married	Housekeeper		Between 100.001 and 300.000FCFA	Secondary	Melen	melen	No	No							No	No	Yes	Yes	No	No	No	No		29	Girl	Mother		No										24 to 35 months	25 to 34 years				Yes	Yes
749	32	Male	Parent	Married	Housekeeper		Between 60.001 and 100.000FCFA	Secondary	Melen	melen	Yes	Yes	Yes	Yes	No	Yes	No											28	Girl	Mother		Yes	9	No		Yes	2021-11-24	2022-08-26		9		24 to 35 months	25 to 34 years	No		No	No	No
750	31	Female	Parent	Married	Others		Between 100.001 and 300.000FCFA	University	Melen	melen	Yes	Yes	Yes	No	No	Yes	No											20	Girl	Mother		Yes	9	No		No						12 to 23 months	25 to 34 years				No	No
751	21	Female	Parent	Unmarried	Housekeeper		Between 100.001 and 300.000FCFA	University	Melen	melen	Yes	Yes	No	No	No	Yes	No											22	Boy	Aunt		Yes	9	No		Yes	2022-05-07	2023-02-10		9		12 to 23 months	<= 24 years	No		No	No	No
752	32	Female	Parent	Unmarried	Housekeeper		Between 60.001 and 100.000FCFA	University	Melen	melen	Yes	Yes	Yes	No	No	No	No											13	Boy	Mother		Yes	9	No		Yes	2023-02-14	2023-11-17		9		12 to 23 months	25 to 34 years	No		No	No	No
753	24	Male	Parent	Unmarried	Others		Between 60.001 and 100.000FCFA	Secondary	Melen	melen	Yes	Yes	No	No	No	Yes	No											12	Boy	Mother		Yes	9	No		No						12 to 23 months	<= 24 years				No	No
754	43	Female	Parent	Married	Others		Between 100.001 and 300.000FCFA	University	Melen	melen	Yes	No							Yes	No	No	No	No	No	No	No		21	Girl	Mother		No										12 to 23 months	>= 35 years				No	No
755	28	Female	Parent	Unmarried	Others		less than 60.000FCFA	Secondary	Melen	melen	Yes	Yes	Yes	Yes	No	Yes	No											19	Boy	Mother		Yes	0	Yes	0	Yes	2022-08-08	2023-05-12	2023-11-27	9	15	12 to 23 months	25 to 34 years	No	No	No	No	No
756	28	Female	Parent	Unmarried	Others		I don't know	Secondary	Melen	melen	Yes	Yes	No	No	No	Yes	No											27	Girl	Mother		Yes	9	Yes	15	Yes	2021-10-08	2022-07-08	2023-01-13	9	15	24 to 35 months	25 to 34 years	No	No	No	No	No
757	26	Female	Parent	Unmarried	Housekeeper		Between 60.001 and 100.000FCFA	University	Melen	melen	Yes	Yes	Yes	No	No	Yes	No											18	Boy	Mother		Yes	0	Yes	0	No						12 to 23 months	25 to 34 years				No	No
758	32	Female	Parent	Unmarried	Others		Between 100.001 and 300.000FCFA	University	Melen	melen	Yes	Yes	No	No	No	Yes	No											17	Boy	Mother		Yes	9	No		Yes	2022-10-16	2023-07-21		9		12 to 23 months	25 to 34 years	No		No	No	No
759	18	Female	Parent	Unmarried	Others		I don't know	Secondary	Melen	melen	Yes	Yes	Yes	No	No	Yes	No											15	Girl	Mother		Yes	0	Yes	0	Yes	2022-12-18	2023-09-20	2024-03-22	9	15	12 to 23 months	<= 24 years	No	No	No	No	No
760	30	Female	Parent	Married	Housekeeper		Between 60.001 and 100.000FCFA	Secondary	Melen	melen	Yes	Yes	No	No	No	Yes	No											12	Boy	Mother		Yes	9	No		Yes	2023-04-10	2024-01-18		9		12 to 23 months	25 to 34 years	No		No	No	No
761	23	Female	Parent	Unmarried	Others		Between 60.001 and 100.000FCFA	University	Melen	melen	Yes	Yes	Yes	No	No	No	No											17	Girl	Mother		Yes	9	Yes	15	Yes	2022-09-24	2023-07-13	2024-01-18	9	15	12 to 23 months	<= 24 years	No	No	No	No	No
762	27	Female	Parent	Unmarried	Housekeeper		Between 60.001 and 100.000FCFA	University	Melen	melen	No	No							Yes	No	Yes	Yes	No	No	No	No		14	Boy	Mother		Yes	9	No		Yes	2023-01-16	2023-10-19		9		12 to 23 months	25 to 34 years	No		No	Yes	Yes
763	26	Female	Parent	Married	Others		Between 60.001 and 100.000FCFA	Secondary	Melen	melen	Yes	Yes	No	No	No	Yes	No											19	Girl	Mother		Yes	9	No		Yes	2022-08-13	2023-05-19		9		12 to 23 months	25 to 34 years	No		No	No	No
764	29	Female	Parent	Married	Others		Between 60.001 and 100.000FCFA	Secondary	Melen	melen	Yes	Yes	Yes	No	No	No	No											12	Girl	Mother		Yes	9	No		Yes	2023-03-15	2023-12-19		9		12 to 23 months	25 to 34 years	No		No	No	No
765	32	Female	Parent	Unmarried	Others		Between 60.001 and 100.000FCFA	Secondary	Melen	melen	Yes	Yes	No	No	No	Yes	No											16	Girl	Mother		Yes	9	No		No						12 to 23 months	25 to 34 years				No	No
766	25	Female	Parent	Unmarried	Others		less than 60.000FCFA	Primary	Melen	melen	Yes	Yes	Yes	Yes	No	Yes	No											16	Boy	Mother		Yes	9	Yes	15	Yes	2022-11-14	2023-08-18	2024-02-22	9	15	12 to 23 months	25 to 34 years	No	No	No	No	No
767	25	Female	Parent	Unmarried	Housekeeper		less than 60.000FCFA	Primary	Melen	melen	Yes	Yes	No	No	No	Yes	No		No	No								12	Boy	Mother		Yes	9	No		Yes	2023-03-14	2023-12-18		9		12 to 23 months	25 to 34 years	No		No	No	No
768	21	Female	Parent	Unmarried	Others		Between 60.001 and 100.000FCFA	University	Melen	melen	Yes	Yes	No	No	No	Yes	No											14	Girl	Mother		Yes	9	No		Yes	2023-01-17	2023-11-14		9		12 to 23 months	<= 24 years	No		No	No	No
769	28	Female	Parent	Unmarried	Others		Between 60.001 and 100.000FCFA	Secondary	Melen	melen	Yes	Yes	No	No	No	Yes	No											30	Girl	Mother		No										24 to 35 months	25 to 34 years				No	No
770	26	Male	Parent	Unmarried	Others		Between 60.001 and 100.000FCFA	University	Melen	melen	No	No							No	Yes	Yes	Yes	No	No	No	No		21	Girl	Mother		No										12 to 23 months	25 to 34 years				Yes	Yes
771	41	Female	Parent	Married	Housekeeper		Between 60.001 and 100.000FCFA	Secondary	Melen	melen	Yes	Yes	Yes	No	No	Yes	No											20	Girl	Mother		Yes	9	No		No						12 to 23 months	>= 35 years				No	No
772	24	Female	Parent	Unmarried	Others		Between 60.001 and 100.000FCFA	University	Melen	melen	Yes	Yes	No	No	No	Yes	No											18	Girl	Mother		Yes	0	No		Yes	2022-09-08	2023-06-14		9		12 to 23 months	<= 24 years	No		No	No	No
773	28	Female	Parent	Unmarried	Others		Between 60.001 and 100.000FCFA	University	Melen	melen	No	No							No	Yes	Yes	No	No	Yes	No	No		16	Girl	Mother		No										12 to 23 months	25 to 34 years				Yes	Yes
774	20	Female	Parent	Unmarried	Others		less than 60.000FCFA	Secondary	Melen	melen	Yes	Yes	Yes	No	No	No	No											32	Girl	Mother		I don't know		I don't know		No						24 to 35 months	<= 24 years				No	No
775	32	Female	Parent	Married	Others		Between 100.001 and 300.000FCFA	University	Melen	melen	Yes	Yes	No	No	Yes	No	No											18	Boy	Mother		Yes	9	Yes	15	Yes	2022-12-14	2023-09-22	2024-03-21	9	15	12 to 23 months	25 to 34 years	No	No	No	No	No
776	27	Female	Parent	Unmarried	Others		less than 60.000FCFA	Secondary	Melen	melen	Yes	Yes	No	No	No	Yes	No											35	Boy	Mother		No										24 to 35 months	25 to 34 years				No	No
777	22	Female	Parent	Unmarried	Others		I don't know	Secondary	Melen	melen	Yes	Yes	Yes	No	No	Yes	No											20	Girl	Mother		I don't know		I don't know		No						12 to 23 months	<= 24 years				No	No
778	28	Female	Parent	Unmarried	Others		Between 100.001 and 300.000FCFA	Secondary	Melen	melen	Yes	Yes	No	No	No	Yes	No											13	Girl	Mother		Yes	0	No		Yes	2023-02-02	2023-11-13		9		12 to 23 months	25 to 34 years	No		No	No	No
779	26	Female	Parent	Unmarried	Others		Between 60.001 and 100.000FCFA	University	Melen	melen	Yes	Yes	Yes	No	Yes	Yes	No											23	Girl	Mother		Yes	9	No		Yes	2022-04-16	2023-01-19		9		12 to 23 months	25 to 34 years	No		No	No	No
780	27	Female	Parent	Unmarried	Housekeeper		less than 60.000FCFA	Secondary	Melen	melen	Yes	Yes	Yes	No	Yes	No	No											12	Boy	Mother		Yes	9	No		Yes	2023-03-04	2024-01-08		10		12 to 23 months	25 to 34 years	Yes		Yes	No	Yes
781	30	Female	Parent	Married	Others		Between 100.001 and 300.000FCFA	Secondary	Melen	melen	Yes	Yes	Yes	Yes	Yes	Yes	No											12	Boy	Mother		No										12 to 23 months	25 to 34 years				No	No
782	33	Female	Parent	Unmarried	Housekeeper		less than 60.000FCFA	Primary	Melen	melen	No	No							Yes	No	No	Yes	No	No	No	No		17	Boy	Mother		No										12 to 23 months	25 to 34 years				Yes	Yes
783	40	Female	Parent	Married	Others		Between 60.001 and 100.000FCFA	University	Melen	melen	Yes	Yes	Yes	Yes	No	Yes	No											18	Girl	Mother		Yes	9	Yes	15	Yes	2022-09-05	2023-07-03	2024-01-02	9	15	12 to 23 months	>= 35 years	No	No	No	No	No
784	37	Female	Parent	Unmarried	Housekeeper		less than 60.000FCFA	Secondary	Melen	melen	Yes	Yes	Yes	No	Yes	No	No											13	Girl	Mother		Yes	9	No		Yes	2023-02-08	2024-01-02		10		12 to 23 months	>= 35 years	Yes		Yes	No	Yes
785	25	Female	Parent	Married	Housekeeper		less than 60.000FCFA	Secondary	Melen	melen	Yes	Yes	Yes	No	No	No	No											15	Girl	Mother		Yes	0	Yes	0	No						12 to 23 months	25 to 34 years				No	No
786	18	Female	Parent	Unmarried	Others		less than 60.000FCFA	Secondary	Biscuiterie	M chat blanc	No	Yes	Yes	No	No	No	No											12	Boy	Mother		No										12 to 23 months	<= 24 years				No	No
787	30	Female	Parent	Married	Others		Between 60.001 and 100.000FCFA	Secondary	Biscuiterie	M chat blanc	Yes	Yes	Yes	No	No	No	No											14	Girl	Mother		Yes	10	No		Yes	2023-01-22	2023-10-24		9		12 to 23 months	25 to 34 years	No		No	No	No
788	25	Female	Parent	Unmarried	Others		less than 60.000FCFA	Secondary	Biscuiterie	M chat blanc	No	No							Yes	No	No	No	No	No	No	No		12	Boy	Mother		No										12 to 23 months	25 to 34 years				Yes	Yes
789	35	Male	Guadian	Unmarried	Others		less than 60.000FCFA	University	Biscuiterie	M chat blanc	Yes	Yes	Yes	No	No	No	No											12	Boy	Father		No										12 to 23 months	>= 35 years				No	No
790	19	Female	Parent	Married	Others		Between 60.001 and 100.000FCFA	University	Biscuiterie	M chat blanc	No	No							Yes	No	No	No	No	No	No	No		12	Boy	Mother		No										12 to 23 months	<= 24 years				Yes	Yes
791	20	Female	Parent	Unmarried	Others		I don't know	Secondary	Biscuiterie	M chat blanc	Yes	Yes	Yes	No	No	No	No											13	Girl	Mother		Yes	9	No		Yes	2023-02-24	2023-11-27		9		12 to 23 months	<= 24 years	No		No	No	No
792	31	Male	Parent	Unmarried	Housekeeper		I don't know	University	Biscuiterie	bafou bar	Yes	Yes	Yes	No	Yes	No	No											18	Boy	Mother		Yes	9	Yes	15	Yes	2022-09-20	2023-06-22	2023-12-25	9	15	12 to 23 months	25 to 34 years	No	No	No	No	No
793	27	Male	Parent	Unmarried	Others		Between 60.001 and 100.000FCFA	University	Biscuiterie	bafou bar	Yes	No							No	No	No	No	Yes	No	No	No		12	Girl	Father		No										12 to 23 months	25 to 34 years				No	No
794	28	Female	Parent	Unmarried	Housekeeper		I don't know	Secondary	Biscuiterie	bafou bar	Yes	No							No	No	Yes	No	No	No	No	No		13	Boy	Mother		No										12 to 23 months	25 to 34 years				No	No
795	19	Female	Parent	Unmarried	Others		less than 60.000FCFA	Secondary	Biscuiterie	bafou bar	Yes	No							Yes	No	No	Yes	No	No	No	No		15	Girl	Mother		No										12 to 23 months	<= 24 years				No	No
796	25	Female	Parent	Unmarried	Others		less than 60.000FCFA	University	Biscuiterie	bafou bar	Yes	No							No	No	Yes	No	No	Yes	No	No		19	Boy	Mother		No										12 to 23 months	25 to 34 years				No	No
797	30	Female	Parent	Unmarried	Others		less than 60.000FCFA	University	Biscuiterie	bafou bar	Yes	No							Yes	No	No	No	No	No	No	No		16	Boy	Mother		No										12 to 23 months	25 to 34 years				No	No
798	37	Female	Parent	Unmarried	Others		less than 60.000FCFA	Secondary	Biscuiterie	moghamo	Yes	Yes	Yes	Yes	No	No	No											12	Boy	Mother		Yes	9	No		Yes	2023-02-10	2023-11-14		9		12 to 23 months	>= 35 years	No		No	No	No
799	23	Male	Parent	Married	Others		Between 100.001 and 300.000FCFA	Secondary	Biscuiterie	moghamo	Yes	Yes	No	No	No	Yes	No											35	Girl	Father		I don't know		I don't know		No						24 to 35 months	<= 24 years				No	No
800	34	Female	Parent	Married	Others		Between 60.001 and 100.000FCFA	University	Biscuiterie	moghamo	Yes	Yes	Yes	Yes	No	No	No											24	Girl	Mother		Yes	10	Yes	17	Yes	2022-03-03	2023-01-02	2023-11-30	9	20	24 to 35 months	25 to 34 years	No	Yes	Yes	No	Yes
801	23	Female	Parent	Unmarried	Others		I don't know	University	Biscuiterie	moghamo	Yes	Yes	Yes	No	Yes	No	No											12	Boy	Mother		No										12 to 23 months	<= 24 years				No	No
802	19	Female	Parent	Unmarried	Others		I don't know	Secondary	Biscuiterie	moghamo	Yes	No							Yes	Yes	No	No	No	No	No	No		18	Girl	Mother		No										12 to 23 months	<= 24 years				No	No
803	30	Female	Parent	Unmarried	Others		Between 60.001 and 100.000FCFA	University	Biscuiterie	moghamo	Yes	No							Yes	No	No	No	No	No	No	No		12	Girl	Mother		No										12 to 23 months	25 to 34 years				No	No
804	22	Female	Parent	Unmarried	Others		I don't know	University	Biscuiterie	moghamo	Yes	Yes	No	No	No	Yes	No											12	Girl	Mother		No										12 to 23 months	<= 24 years				No	No
805	39	Male	Parent	Married	Others		Between 100.001 and 300.000FCFA	University	Biscuiterie	moghamo	Yes	Yes	No	No	No	Yes	No											24	Girl	Mother		I don't know		I don't know		No						24 to 35 months	>= 35 years				No	No
806	28	Male	Guadian	Unmarried	Others		Between 60.001 and 100.000FCFA	Secondary	Biscuiterie	moghamo	Yes	No							Yes	Yes	No	No	Yes	No	No	No		14	Boy	Father		I don't know		I don't know		No						12 to 23 months	25 to 34 years				No	No
807	30	Male	Parent	Married	Others		less than 60.000FCFA	University	Biscuiterie	moghamo	Yes	Yes	Yes	No	No	No	No											14	Boy	Father		Yes	9	No		Yes	2023-01-15	2023-10-18		9		12 to 23 months	25 to 34 years	No		No	No	No
808	25	Female	Guadian	Unmarried	Others		less than 60.000FCFA	Secondary	Biscuiterie	moghamo	Yes	Yes	Yes	No	No	Yes	No											17	Girl	Aunt		No										12 to 23 months	25 to 34 years				No	No
809	35	Female	Parent	Married	Others		Between 100.001 and 300.000FCFA	University	Biscuiterie	moghamo	Yes	Yes	Yes	No	No	No	No											24	Boy	Mother		Yes	10	Yes	15	Yes	2022-03-19	2023-01-05	2023-06-23	9	15	24 to 35 months	>= 35 years	No	No	No	No	No
810	25	Female	Parent	Married	Others		Between 100.001 and 300.000FCFA	University	Biscuiterie	moghamo	Yes	Yes	Yes	Yes	Yes	Yes	No											12	Boy	Mother		Yes	11	No		Yes	2023-03-18	2024-02-20		11		12 to 23 months	25 to 34 years	Yes		Yes	No	Yes
811	24	Male	Guadian	Unmarried	Others		Between 60.001 and 100.000FCFA	University	Biscuiterie	moghamo	No	Yes	No	No	No	No	Yes	sa mère a dit de vacciner										15	Girl	Uncle		I don't know		No		Yes	2023-01-19	2023-11-03		9		12 to 23 months	<= 24 years	No		No	No	No
812	33	Female	Parent	Unmarried	Others		I don't know	Secondary	Biscuiterie	moghamo	Yes	Yes	Yes	No	No	No	No											13	Boy	Mother		Yes	9	No		Yes	2023-02-22	2023-11-28		9		12 to 23 months	25 to 34 years	No		No	No	No
813	30	Male	Guadian	Unmarried	Others		Between 100.001 and 300.000FCFA	University	Biscuiterie	moghamo	Yes	Yes	Yes	No	No	Yes	No											13	Boy	Aunt		Yes	10	No		Yes	2023-02-12	2023-12-15		10		12 to 23 months	25 to 34 years	Yes		Yes	No	Yes
814	26	Female	Parent	Married	Others		Between 60.001 and 100.000FCFA	Secondary	Biscuiterie	moghamo	Yes	Yes	No	No	No	Yes	No											18	Girl	Mother		Yes	9	Yes	15	Yes	2022-09-18	2023-06-19	2023-12-19	9	15	12 to 23 months	25 to 34 years	No	No	No	No	No
815	40	Male	Guadian	Unmarried	Others		Between 60.001 and 100.000FCFA	University	Biscuiterie	moghamo	Yes	Yes	Yes	No	No	No	No											15	Boy	Father		Yes	10	No		Yes	2022-12-18	2023-09-20		9		12 to 23 months	>= 35 years	No		No	No	No
816	35	Male	Parent	Unmarried	Others		Between 60.001 and 100.000FCFA	University	Biscuiterie	moghamo	Yes	Yes	Yes	No	No	No	No											13	Girl	Father		Yes	9	No		Yes	2023-02-02	2023-12-13		10		12 to 23 months	>= 35 years	Yes		Yes	No	Yes
817	37	Female	Parent	Unmarried	Others		I don't know	Primary	Biscuiterie	ancien vatican	Yes	Yes	Yes	No	No	No	No											18	Girl	Mother		I don't know		I don't know		No						12 to 23 months	>= 35 years				No	No
818	25	Female	Parent	Unmarried	Others		Between 100.001 and 300.000FCFA	University	Biscuiterie	ancien vatican	Yes	Yes	Yes	Yes	No	No	No											13	Boy	Mother		Yes	9	No		Yes	2023-02-15	2023-11-15		9		12 to 23 months	25 to 34 years	No		No	No	No
819	31	Female	Parent	Married	Others		More than 300.000FCFA	University	Biscuiterie	ancien vatican	Yes	No							No	Yes	Yes	No	No	Yes	No	No		17	Girl	Father		I don't know		I don't know		No						12 to 23 months	25 to 34 years				No	No
820	36	Female	Parent	Married	Housekeeper		I don't know	Secondary	Biscuiterie	ancien vatican	Yes	Yes	Yes	Yes	No	No	No											35	Girl	Mother		Yes	9	Yes	15	Yes	2021-04-09	2022-01-11	2022-07-12	9	15	24 to 35 months	>= 35 years	No	No	No	No	No
821	20	Female	Parent	Unmarried	Others		I don't know	Secondary	Biscuiterie	ancien vatican	Yes	No							No	No	No	No	No	Yes	No	No		18	Boy	Mother		No										12 to 23 months	<= 24 years				No	No
822	36	Male	Parent	Unmarried	Others		Between 60.001 and 100.000FCFA	University	Biscuiterie	ancien vatican	Yes	No							Yes	No	No	No	Yes	No	No	No		24	Girl	Father		I don't know		I don't know		Yes	2022-03-13	2022-12-13	2023-09-13	9	18	24 to 35 months	>= 35 years	No	No	No	No	No
823	28	Female	Parent	Unmarried	Others		less than 60.000FCFA	Secondary	Biscuiterie	ancien vatican	Yes	Yes	Yes	No	No	Yes	No											18	Girl	Mother		Yes	0	No		Yes	2022-09-01	2023-06-01		9		12 to 23 months	25 to 34 years	No		No	No	No
824	27	Male	Parent	Unmarried	Others		Between 60.001 and 100.000FCFA	University	Biscuiterie	entr!e garage	No	No							Yes	Yes	No	Yes	No	Yes	No	No		24	Boy	Mother		No										24 to 35 months	25 to 34 years				Yes	Yes
825	29	Female	Parent	Unmarried	Others		Between 100.001 and 300.000FCFA	University	Biscuiterie	entr!e garage	Yes	Yes	Yes	No	No	No	No											12	Boy	Mother		Yes	10	No		Yes	2023-03-17	2024-01-17		10		12 to 23 months	25 to 34 years	Yes		Yes	No	Yes
826	18	Female	Parent	Unmarried	Others		I don't know	Secondary	Biscuiterie	entr!e garage	Yes	No							Yes	No	No	No	No	No	No	No		25	Boy	Mother		No										24 to 35 months	<= 24 years				No	No
827	30	Female	Guadian	Unmarried	Others		Between 60.001 and 100.000FCFA	University	Biscuiterie	entr!e garage	Yes	Yes	Yes	No	No	No	No											34	Girl	Others	menagere	I don't know		I don't know		No						24 to 35 months	25 to 34 years				No	No
828	37	Female	Parent	Married	Others		More than 300.000FCFA	University	Biscuiterie	entr!e garage	Yes	Yes	No	No	Yes	No	No											25	Girl	Mother		Yes	10	Yes	15	Yes	2022-02-08	2022-11-09	2023-07-17	9	17	24 to 35 months	>= 35 years	No	No	No	No	No
829	29	Female	Parent	Unmarried	Housekeeper		Between 60.001 and 100.000FCFA	University	Biscuiterie	entr!e garage	Yes	No							Yes	No	Yes	No	No	No	No	No		16	Girl	Mother		No										12 to 23 months	25 to 34 years				No	No
830	32	Female	Parent	Unmarried	Others		I don't know	Secondary	Biscuiterie	entr!e garage	Yes	Yes	Yes	No	No	No	No											25	Boy	Mother		No										24 to 35 months	25 to 34 years				No	No
831	30	Female	Parent	Unmarried	Others		less than 60.000FCFA	Secondary	Biscuiterie	entr!e garage	Yes	No							Yes	No	No	No	No	No	No	No		15	Girl	Father		No										12 to 23 months	25 to 34 years				No	No
832	24	Female	Parent	Unmarried	Others		Between 60.001 and 100.000FCFA	Secondary	Biscuiterie	entr!e garage	Yes	Yes	Yes	No	No	No	No											13	Girl	Mother		Yes	0	No		Yes	2023-02-15	2023-11-15		9		12 to 23 months	<= 24 years	No		No	No	No
833	38	Male	Guadian	Unmarried	Others		More than 300.000FCFA	University	Biscuiterie	entr!e garage	Yes	Yes	Yes	No	No	Yes	No											24	Boy	Others	menagere	I don't know		I don't know		No						24 to 35 months	>= 35 years				No	No
834	35	Female	Parent	Married	Others		Between 100.001 and 300.000FCFA	University	Biscuiterie	entr!e garage	Yes	Yes	Yes	No	No	No	No											12	Girl	Father		Yes	0	No		Yes	2023-03-13	2023-12-13		9		12 to 23 months	>= 35 years	No		No	No	No
835	40	Female	Parent	Married	Housekeeper		I don't know	Secondary	Biscuiterie	entr!e garage	Yes	Yes	No	No	No	Yes	No											32	Boy	Mother		I don't know		I don't know		Yes	2021-07-08	2022-04-08	2022-11-08	9	16	24 to 35 months	>= 35 years	No	No	No	No	No
836	29	Female	Parent	Married	Housekeeper		Between 100.001 and 300.000FCFA	Secondary	Biscuiterie	humanity	Yes	Yes	Yes	No	No	No	No											15	Boy	Mother		Yes	0	No		Yes	2022-12-07	2023-09-07		9		12 to 23 months	25 to 34 years	No		No	No	No
837	33	Male	Parent	Unmarried	Others		Between 60.001 and 100.000FCFA	Secondary	Biscuiterie	humanity	Yes	Yes	No	No	Yes	Yes	No											13	Girl	Mother		I don't know		I don't know		No						12 to 23 months	25 to 34 years				No	No
838	36	Female	Parent	Married	Others		Between 60.001 and 100.000FCFA	University	Biscuiterie	humanity	Yes	Yes	Yes	No	No	Yes	No											24	Girl	Mother		Yes	10	Yes	15	Yes	2022-02-11	2022-12-09	2023-08-10	9	17	24 to 35 months	>= 35 years	No	No	No	No	No
839	30	Female	Parent	Unmarried	Others		Between 60.001 and 100.000FCFA	University	Biscuiterie	entr!e jesus care	Yes	No							No	No	Yes	No	Yes	No	No	No		12	Boy	Father		No										12 to 23 months	25 to 34 years				No	No
840	25	Female	Parent	Unmarried	Others		Between 60.001 and 100.000FCFA	University	Biscuiterie	entr!e jesus care	Yes	Yes	No	No	No	Yes	No											13	Boy	Mother		Yes	9	No		Yes	2023-02-06	2023-11-10		9		12 to 23 months	25 to 34 years	No		No	No	No
841	24	Male	Parent	Unmarried	Others		less than 60.000FCFA	University	Biscuiterie	carrefour obili	Yes	Yes	Yes	No	No	No	No											12	Boy	Mother		Yes	9	No		Yes	2023-02-28	2024-02-28		12		12 to 23 months	<= 24 years	Yes		Yes	No	Yes
842	40	Male	Guadian	Married	Others		Between 100.001 and 300.000FCFA	Secondary	Biscuiterie	carrefour obili	Yes	Yes	Yes	Yes	No	Yes	No											30	Girl	Others	menagere	I don't know		No		No						24 to 35 months	>= 35 years				No	No
843	37	Female	Parent	Unmarried	Others		Between 60.001 and 100.000FCFA	Secondary	Biscuiterie	carrefour obili	Yes	Yes	Yes	Yes	No	No	No											25	Girl	Mother		Yes	10	Yes	15	Yes	2022-01-20	2022-11-21	2023-07-21	10	18	24 to 35 months	>= 35 years	Yes	No	Yes	No	Yes
844	30	Female	Parent	Married	Housekeeper		I don't know	University	Biscuiterie	carrefour obili	Yes	Yes	Yes	Yes	No	No	No											16	Girl	Mother		No										12 to 23 months	25 to 34 years				No	No
845	33	Female	Parent	Married	Others		less than 60.000FCFA	University	Biscuiterie	carrefour obili	No	Yes	No	No	No	No	Yes	mon mari l'exige pour tout ces enfants										13	Boy	Mother		Yes	0	No		Yes	2023-02-16	2023-11-16		9		12 to 23 months	25 to 34 years	No		No	No	No
846	26	Female	Parent	Unmarried	Others		Between 60.001 and 100.000FCFA	University	Biscuiterie	carrefour obili	Yes	Yes	Yes	Yes	No	No	No											12	Girl	Mother		Yes	9	No		Yes	2023-03-17	2023-12-20		9		12 to 23 months	25 to 34 years	No		No	No	No
847	20	Female	Parent	Unmarried	Others		I don't know	Secondary	Biscuiterie	carrefour obili	Yes	Yes	Yes	No	No	No	No											17	Girl	Others	grand Mother	I don't know		I don't know		No						12 to 23 months	<= 24 years				No	No
848	28	Female	Parent	Unmarried	Others		Between 60.001 and 100.000FCFA	University	Biscuiterie	carrefour obili	Yes	No							No	No	Yes	No	No	Yes	No	No		12	Girl	Mother		Yes	0	No		Yes	2023-02-28	2023-12-29		10		12 to 23 months	25 to 34 years	Yes		Yes	No	Yes
849	23	Female	Parent	Unmarried	Others		I don't know	Secondary	Biscuiterie	carrefour obili	Yes	No							Yes	No	No	No	No	No	No	No		14	Boy	Mother		No										12 to 23 months	<= 24 years				No	No
850	29	Female	Parent	Married	Housekeeper		Between 100.001 and 300.000FCFA	University	Biscuiterie	carrefour obili	Yes	Yes	Yes	Yes	No	No	No											12	Girl	Mother		Yes	9	No		Yes	2023-03-12	2024-02-05		10		12 to 23 months	25 to 34 years	Yes		Yes	No	Yes
851	26	Male	Parent	Unmarried	Others		I don't know	University	Biscuiterie	M chat blanc	Yes	Yes	Yes	No	No	No	No											15	Boy	Mother		Yes	0	Yes	0	Yes	2022-11-17	2023-08-17	2024-02-19	9	15	12 to 23 months	25 to 34 years	No	No	No	No	No
852	19	Female	Parent	Unmarried	Others		I don't know	Secondary	Biscuiterie	M chat blanc	Yes	Yes	No	No	Yes	Yes	No											14	Boy	Mother		Yes	9	No		No						12 to 23 months	<= 24 years				No	No
853	36	Female	Parent	Married	Others		More than 300.000FCFA	University	Biscuiterie	M chat blanc	Yes	Yes	Yes	Yes	No	No	No											28	Boy	Mother		Yes	10	Yes	15	Yes	2021-11-12	2022-08-12	2023-02-15	9	15	24 to 35 months	>= 35 years	No	No	No	No	No
854	32	Male	Parent	Unmarried	Others		Between 60.001 and 100.000FCFA	University	Biscuiterie	M chat blanc	Yes	Yes	No	Yes	No	Yes	No											24	Boy	Mother		Yes	9	No		Yes	2022-03-03	2022-12-06		9		24 to 35 months	25 to 34 years	No		No	No	No
855	28	Female	Parent	Unmarried	Others		less than 60.000FCFA	Secondary	Biscuiterie	M chat blanc	Yes	Yes	Yes	No	No	Yes	No											13	Boy	Mother		No										12 to 23 months	25 to 34 years				No	No
856	20	Female	Parent	Unmarried	Others		I don't know	Secondary	Biscuiterie	boulangerie fran!aise	Yes	No							Yes	No	No	No	No	No	No	No		12	Girl	Mother		No										12 to 23 months	<= 24 years				No	No
857	30	Male	Guadian	Unmarried	Others		Between 100.001 and 300.000FCFA	University	Biscuiterie	boulangerie fran!aise	Yes	Yes	Yes	Yes	No	No	No											34	Girl	Cousine		I don't know		I don't know		No						24 to 35 months	25 to 34 years				No	No
858	39	Female	Parent	Married	Others		Between 100.001 and 300.000FCFA	University	Biscuiterie	boulangerie fran!aise	Yes	Yes	Yes	No	No	No	No											24	Girl	Mother		Yes	9	Yes	18	Yes	2022-01-04	2022-10-07	2023-06-14	9	17	24 to 35 months	>= 35 years	No	No	No	No	No
859	19	Female	Parent	Unmarried	Others		I don't know	Secondary	Biscuiterie	boulangerie fran!aise	Yes	Yes	No	No	No	Yes	No											16	Boy	Mother		Yes	0	No		Yes	2022-11-11	2023-08-11		9		12 to 23 months	<= 24 years	No		No	No	No
860	40	Male	Parent	Married	Others		Between 100.001 and 300.000FCFA	University	Biscuiterie	boulangerie fran!aise	Yes	Yes	Yes	No	No	No	No											15	Girl	Father		I don't know		I don't know		No						12 to 23 months	>= 35 years				No	No
861	23	Female	Parent	Unmarried	Others		less than 60.000FCFA	Secondary	Biscuiterie	hotel santa belle	Yes	Yes	Yes	No	No	No	No											13	Boy	Mother		Yes	9	No		Yes	2023-02-07	2023-11-07		9		12 to 23 months	<= 24 years	No		No	No	No
862	26	Female	Parent	Married	Housekeeper		I don't know	Secondary	Biscuiterie	hotel santa belle	Yes	Yes	Yes	Yes	No	No	No											20	Girl	Mother		Yes	9	No		Yes	2023-06-29	2024-04-03		9		12 to 23 months	25 to 34 years	No		No	No	No
863	28	Female	Parent	Unmarried	Others		Between 60.001 and 100.000FCFA	University	Biscuiterie	hotel santa belle	Yes	No							No	Yes	Yes	Yes	No	No	No	No		18	Boy	Mother		No										12 to 23 months	25 to 34 years				No	No
864	24	Female	Parent	Unmarried	Others		I don't know	University	Biscuiterie	hotel santa belle	Yes	Yes	Yes	Yes	No	Yes	No											12	Girl	Mother		No										12 to 23 months	<= 24 years				No	No
865	30	Female	Parent	Married	Others		Between 100.001 and 300.000FCFA	Secondary	Biscuiterie	boulangerie fran!aise	Yes	Yes	Yes	No	No	No	No											14	Girl	Mother		Yes	9	No		Yes	2022-12-11	2023-09-11		9		12 to 23 months	25 to 34 years	No		No	No	No
866	25	Male	Parent	Unmarried	Others		less than 60.000FCFA	University	Etoug-Ebe	JOIE	Yes	Yes	Yes	No	No	No	No											18	Boy	Mother		Yes	9	Yes	15	No						12 to 23 months	25 to 34 years				No	No
867	30	Male	Parent	Married	Others		Between 60.001 and 100.000FCFA	Secondary	Etoug-Ebe	JOIE	Yes	Yes	No	No	No	Yes	No											24	Boy	Mother		Yes	9	No		Yes	2022-03-12	2022-12-16		9		24 to 35 months	25 to 34 years	No		No	No	No
868	33	Female	Parent	Unmarried	Others		Between 60.001 and 100.000FCFA	Secondary	Etoug-Ebe	JOIE	Yes	Yes	No	No	No	Yes	No											12	Boy	Mother		Yes	9	No		Yes	2023-03-06	2023-12-06		9		12 to 23 months	25 to 34 years	No		No	No	No
869	46	Female	Parent	Married	Others		Between 60.001 and 100.000FCFA	Secondary	Etoug-Ebe	JOIE	Yes	Yes	No	No	No	Yes	No											25	Girl	Mother		Yes	10	Yes	17	Yes	2022-01-12	2022-10-12	2023-04-12	9	15	24 to 35 months	>= 35 years	No	No	No	No	No
870	23	Female	Parent	Unmarried	Others		less than 60.000FCFA	Secondary	Etoug-Ebe	JOIE	Yes	Yes	No	No	No	Yes	No											18	Girl	Mother		Yes	0	No		No						12 to 23 months	<= 24 years				No	No
871	28	Female	Parent	Unmarried	Housekeeper		less than 60.000FCFA	Secondary	Etoug-Ebe	NKOLZIE A	Yes	Yes	No	No	No	Yes	No											34	Girl	Mother		Yes	9	Yes	15	Yes	2021-05-20	2022-02-22	2022-08-22	9	15	24 to 35 months	25 to 34 years	No	No	No	No	No
872	23	Female	Parent	Unmarried	Housekeeper		Between 60.001 and 100.000FCFA	Secondary	Etoug-Ebe	JOIE	Yes	Yes	No	No	No	Yes	No											13	Boy	Mother		Yes	9	No		Yes	2023-02-12	2023-12-27		10		12 to 23 months	<= 24 years	Yes		Yes	No	Yes
873	58	Female	Guadian	Married	Others		Between 60.001 and 100.000FCFA	Secondary	Etoug-Ebe	JOIE	Yes	Yes	No	No	Yes	Yes	No											35	Boy	Mother		Yes	10	Yes	16	No						24 to 35 months	>= 35 years				No	No
874	33	Female	Parent	Married	Others		Between 100.001 and 300.000FCFA	University	Etoug-Ebe	JOIE	Yes	Yes	No	No	No	Yes	No											24	Boy	Mother		Yes	9	Yes	15	Yes	2022-03-07	2022-12-07	2023-06-12	9	15	24 to 35 months	25 to 34 years	No	No	No	No	No
875	40	Female	Parent	Married	Others		Between 100.001 and 300.000FCFA	University	Etoug-Ebe	JOIE	Yes	Yes	No	No	No	Yes	No											34	Boy	Mother		Yes	0	Yes	0	No						24 to 35 months	>= 35 years				No	No
876	26	Female	Parent	Unmarried	Others		less than 60.000FCFA	Secondary	Etoug-Ebe	NKOLZIE A	Yes	Yes	Yes	No	No	Yes	No											15	Girl	Mother		Yes	10	No		Yes	2022-12-05	2023-09-05		9		12 to 23 months	25 to 34 years	No		No	No	No
877	26	Female	Parent	Unmarried	Others		less than 60.000FCFA	Secondary	Etoug-Ebe	NKOLZIE A	Yes	Yes	Yes	No	No	Yes	No											14	Girl	Mother		Yes	9	No		No						12 to 23 months	25 to 34 years				No	No
878	43	Female	Parent	Married	Others		Between 60.001 and 100.000FCFA	University	Etoug-Ebe	NKOLZIE A	No	No							No	Yes	Yes	Yes	No	No	No	No		35	Boy	Mother		No										24 to 35 months	>= 35 years				Yes	Yes
879	58	Female	Guadian	Married	Others		Between 100.001 and 300.000FCFA	University	Etoug-Ebe	NKOLZIE A	Yes	Yes	No	No	No	Yes	No											24	Boy	Mother		Yes	9	Yes	15	No						24 to 35 months	>= 35 years				No	No
880	59	Female	Guadian	Married	Others		Between 60.001 and 100.000FCFA	Secondary	Etoug-Ebe	JOIE	Yes	Yes	No	No	No	Yes	No											26	Girl	Mother		Yes	0	Yes	0	Yes	2022-01-08	2022-10-12	2023-04-12	9	15	24 to 35 months	>= 35 years	No	No	No	No	No
881	65	Female	Guadian	Married	Others		Between 100.001 and 300.000FCFA	University	Etoug-Ebe	JOIE	Yes	Yes	Yes	No	No	No	No											32	Girl	Mother		I don't know		I don't know		No						24 to 35 months	>= 35 years				No	No
882	49	Female	Parent	Married	Others		Between 60.001 and 100.000FCFA	University	Etoug-Ebe	NKOLZIE A	Yes	Yes	No	No	No	Yes	No											24	Girl	Aunt		I don't know		I don't know		No						24 to 35 months	>= 35 years				No	No
883	37	Female	Parent	Married	Others		Between 60.001 and 100.000FCFA	Secondary	Etoug-Ebe	NKOLZIE A	Yes	No							No	Yes	Yes	No	No	No	No	No		26	Girl	Mother		No										24 to 35 months	>= 35 years				No	No
884	48	Female	Parent	Married	Others		Between 60.001 and 100.000FCFA	University	Etoug-Ebe	NKOLZIE A	Yes	Yes	Yes	No	No	No	No											26	Girl	Mother		Yes	9	Yes	16	Yes	2022-01-17	2022-10-17	2023-04-17	9	15	24 to 35 months	>= 35 years	No	No	No	No	No
885	36	Female	Parent	Married	Others		Between 60.001 and 100.000FCFA	Secondary	Etoug-Ebe	NKOLZIE A	Yes	Yes	Yes	No	No	No	No											19	Boy	Mother		I don't know		No		Yes	2022-08-03	2023-05-03		9		12 to 23 months	>= 35 years	No		No	No	No
886	38	Female	Parent	Married	Others		Between 60.001 and 100.000FCFA	Secondary	Etoug-Ebe	NKOLZIE A	Yes	Yes	Yes	No	No	Yes	No											25	Boy	Mother		I don't know		No		Yes	2022-02-07	2022-11-10		9		24 to 35 months	>= 35 years	No		No	No	No
887	22	Female	Parent	Unmarried	Others		less than 60.000FCFA	Secondary	Etoug-Ebe	JOIE	Yes	Yes	No	Yes	No	No	No											13	Girl	Mother		Yes	0	No		Yes	2023-02-19	2023-11-23		9		12 to 23 months	<= 24 years	No		No	No	No
888	36	Female	Parent	Unmarried	Housekeeper		Between 60.001 and 100.000FCFA	Secondary	Etoug-Ebe	JOIE	Yes	Yes	No	No	No	Yes	No											17	Girl	Mother		No										12 to 23 months	>= 35 years				No	No
889	59	Female	Guadian	Married	Others		Between 100.001 and 300.000FCFA	Secondary	Etoug-Ebe	JOIE	Yes	Yes	Yes	No	No	Yes	No											22	Girl	Mother		Yes	9	No		Yes	2022-05-16	2023-02-17		9		12 to 23 months	>= 35 years	No		No	No	No
890	29	Female	Parent	Unmarried	Others		less than 60.000FCFA	Secondary	Etoug-Ebe	NKOLZIE A	Yes	Yes	Yes	Yes	No	Yes	No											16	Girl	Mother		Yes	0	Yes	15	Yes	2022-11-13	2023-08-16	2024-02-16	9	15	12 to 23 months	25 to 34 years	No	No	No	No	No
891	58	Female	Guadian	Married	Others		Between 100.001 and 300.000FCFA	Secondary	Etoug-Ebe	NKOLZIE A	Yes	Yes	No	No	No	Yes	No											18	Boy	Others	grand Mother	Yes	9	Yes	15	Yes	2022-09-22	2023-06-22	2024-01-04	9	15	12 to 23 months	>= 35 years	No	No	No	No	No
892	29	Female	Parent	Unmarried	Others		less than 60.000FCFA	University	Etoug-Ebe	JOIE	Yes	Yes	No	No	No	Yes	No											12	Girl	Mother		Yes	0	No		No						12 to 23 months	25 to 34 years				No	No
893	44	Female	Parent	Married	Others		Between 60.001 and 100.000FCFA	Secondary	Etoug-Ebe	JOIE	Yes	Yes	Yes	No	No	No	No											23	Boy	Mother		I don't know		No		Yes	2022-04-02	2023-01-04		9		12 to 23 months	>= 35 years	No		No	No	No
894	39	Female	Parent	Married	Housekeeper		Between 100.001 and 300.000FCFA	Secondary	Etoug-Ebe	NKOLZIE A	No	No							No	Yes	Yes	No	No	Yes	No	No		28	Girl	Mother		No										24 to 35 months	>= 35 years				Yes	Yes
895	32	Female	Parent	Unmarried	Others		less than 60.000FCFA	Secondary	Etoug-Ebe	NKOLZIE B	Yes	Yes	Yes	No	No	Yes	No											25	Boy	Mother		Yes	10	Yes	16	Yes	2022-02-16	2022-11-16	2023-05-18	9	15	24 to 35 months	25 to 34 years	No	No	No	No	No
896	65	Male	Guadian	Married	Others		Between 100.001 and 300.000FCFA	Primary	Etoug-Ebe	NKOLZIE B	Yes	Yes	No	Yes	No	No	No											24	Girl	Mother		I don't know		I don't know		No						24 to 35 months	>= 35 years				No	No
897	29	Female	Parent	Married	Others		Between 60.001 and 100.000FCFA	Secondary	Etoug-Ebe	NKOLZIE B	Yes	Yes	Yes	No	No	No	No											14	Girl	Mother		Yes	10	Yes	17	No						12 to 23 months	25 to 34 years				No	No
898	27	Female	Guadian	Married	Others		less than 60.000FCFA	Secondary	Etoug-Ebe	NKOLZIE B	Yes	Yes	Yes	No	No	No	No											24	Boy	Mother		Yes	9	No		Yes	2022-03-13	2023-01-06		9		24 to 35 months	25 to 34 years	No		No	No	No
899	45	Female	Parent	Married	Others		Between 100.001 and 300.000FCFA	Secondary	Etoug-Ebe	NKOLZIE B	Yes	Yes	No	No	No	Yes	No											30	Girl	Mother		Yes	0	No		No						24 to 35 months	>= 35 years				No	No
900	35	Female	Parent	Unmarried	Others		Between 60.001 and 100.000FCFA	Secondary	Etoug-Ebe	NKOLZIE B	Yes	Yes	Yes	No	No	Yes	No											13	Girl	Aunt		No										12 to 23 months	>= 35 years				No	No
901	43	Female	Guadian	Married	Housekeeper		less than 60.000FCFA	Secondary	Etoug-Ebe	NKOLZIE B	Yes	No							No	No	No	No	Yes	No	No	No		12	Girl	Mother		No										12 to 23 months	>= 35 years				No	No
902	60	Female	Guadian	Married	Others		Between 60.001 and 100.000FCFA	University	Etoug-Ebe	NKOLZIE B	Yes	Yes	Yes	No	No	Yes	No											22	Boy	Mother		I don't know		I don't know		No						12 to 23 months	>= 35 years				No	No
903	25	Female	Parent	Unmarried	Others		Between 60.001 and 100.000FCFA	Secondary	Etoug-Ebe	NKOLZIE B	Yes	Yes	Yes	No	No	No	No											24	Boy	Mother		Yes	9	No		Yes	2022-03-17	2022-12-21		9		24 to 35 months	25 to 34 years	No		No	No	No
904	45	Female	Guadian	Unmarried	Others		Between 100.001 and 300.000FCFA	Secondary	Etoug-Ebe	NKOLZIE B	Yes	Yes	No	No	No	Yes	No											35	Girl	Mother		I don't know		No		Yes	2021-04-19	2022-01-19		9		24 to 35 months	>= 35 years	No		No	No	No
905	40	Female	Parent	Married	Others		Between 100.001 and 300.000FCFA	University	Etoug-Ebe	NKOLZIE B	Yes	Yes	No	No	No	Yes	No											24	Boy	Mother		Yes	9	Yes	15	Yes	2022-03-08	2022-12-09	2023-06-09	9	15	24 to 35 months	>= 35 years	No	No	No	No	No
906	30	Male	Parent	Married	Others		less than 60.000FCFA	University	Etoug-Ebe	NKOLZIE B	Yes	Yes	Yes	No	No	Yes	No											24	Girl	Father		Yes	9	Yes	16	No						24 to 35 months	25 to 34 years				No	No
907	38	Female	Parent	Married	Housekeeper		Between 60.001 and 100.000FCFA	Secondary	Etoug-Ebe	NKOLZIE B	Yes	Yes	No	No	No	Yes	No											12	Girl	Mother		Yes	9	No		Yes	2023-03-12	2023-12-15		9		12 to 23 months	>= 35 years	No		No	No	No
908	36	Female	Guadian	Married	Housekeeper		I don't know	University	Etoug-Ebe	NKOLZIE B	Yes	Yes	No	No	No	Yes	No											27	Girl	Aunt		Yes	9	Yes	15	No						24 to 35 months	>= 35 years				No	No
909	52	Female	Guadian	Married	Others		Between 100.001 and 300.000FCFA	University	Etoug-Ebe	NKOLZIE B	Yes	Yes	No	No	No	Yes	No											26	Boy	Mother		Yes	9	Yes	15	No						24 to 35 months	>= 35 years				No	No
910	48	Female	Guadian	Married	Others		More than 300.000FCFA	University	Etoug-Ebe	NKOLZIE B	Yes	Yes	No	No	No	Yes	No											22	Boy	Mother		Yes	10	Yes	16	Yes	2022-05-06	2023-02-10	2023-08-11	9	15	12 to 23 months	>= 35 years	No	No	No	No	No
911	35	Female	Parent	Unmarried	Housekeeper		Between 60.001 and 100.000FCFA	Secondary	Etoug-Ebe	NKOLZIE B	No	No							Yes	No	No	No	No	Yes	No	No		32	Boy	Mother		No										24 to 35 months	>= 35 years				Yes	Yes
912	55	Female	Guadian	Married	Others		less than 60.000FCFA	Secondary	Etoug-Ebe	NKOLZIE B	Yes	Yes	No	No	No	Yes	No											28	Girl	Mother		I don't know		No		Yes	2021-11-12	2022-08-12		9		24 to 35 months	>= 35 years	No		No	No	No
913	35	Female	Parent	Married	Others		Between 100.001 and 300.000FCFA	University	Etoug-Ebe	NKOLZIE B	Yes	Yes	Yes	Yes	Yes	Yes	No											14	Girl	Mother		Yes	9	No		Yes	2023-01-22	2023-10-25		9		12 to 23 months	>= 35 years	No		No	No	No
914	38	Female	Parent	Unmarried	Others		Between 60.001 and 100.000FCFA	Secondary	Etoug-Ebe	NKOLZIE B	Yes	Yes	No	No	No	Yes	No											33	Boy	Mother		No										24 to 35 months	>= 35 years				No	No
915	27	Female	Parent	Unmarried	Housekeeper		less than 60.000FCFA	Secondary	Etoug-Ebe	NKOLZIE B	Yes	Yes	No	No	No	Yes	No											30	Boy	Mother		Yes	9	Yes	15	Yes	2021-09-02	2022-06-17	2023-01-20	9	16	24 to 35 months	25 to 34 years	No	No	No	No	No
916	30	Female	Parent	Married	Others		Between 60.001 and 100.000FCFA	Secondary	Etoug-Ebe	NKOLZIE A	Yes	Yes	Yes	No	No	No	No											32	Girl	Mother		Yes	0	No		Yes	2021-07-08	2022-04-08		9		24 to 35 months	25 to 34 years	No		No	No	No
917	22	Male	Parent	Unmarried	Others		less than 60.000FCFA	Secondary	Etoug-Ebe	JOIE	No	No							No	Yes	Yes	No	No	No	No	No		28	Girl	Mother		No										24 to 35 months	<= 24 years				Yes	Yes
918	45	Female	Guadian	Married	Others		Between 100.001 and 300.000FCFA	University	Etoug-Ebe	JOIE	Yes	Yes	No	No	No	Yes	No											33	Boy	Mother		Yes	9	Yes	16	Yes	2021-06-09	2022-03-11	2022-10-07	9	15	24 to 35 months	>= 35 years	No	No	No	No	No
919	31	Female	Parent	Married	Others		Between 100.001 and 300.000FCFA	University	Etoug-Ebe	JOIE	Yes	Yes	No	No	No	Yes	No											20	Girl	Mother		Yes	10	No		Yes	2022-07-28	2023-05-05		9		12 to 23 months	25 to 34 years	No		No	No	No
920	34	Female	Parent	Married	Others		Between 60.001 and 100.000FCFA	Secondary	Etoug-Ebe	NKOLZIE A	Yes	Yes	Yes	No	No	Yes	No											17	Girl	Mother		Yes	9	Yes	15	No						12 to 23 months	25 to 34 years				No	No
921	27	Female	Parent	Unmarried	Others		Between 100.001 and 300.000FCFA	Secondary	Etoug-Ebe	NKOLZIE A	No	Yes	Yes	No	No	No	No											20	Boy	Mother		Yes	10	Yes	16	No						12 to 23 months	25 to 34 years				No	No
922	25	Female	Parent	Unmarried	Others		less than 60.000FCFA	Secondary	Etoug-Ebe	NKOLZIE A	Yes	Yes	No	No	No	Yes	No											18	Girl	Mother		Yes	9	Yes	15	No						12 to 23 months	25 to 34 years				No	No
923	30	Female	Parent	Married	Others		Between 100.001 and 300.000FCFA	University	Etoug-Ebe	NKOLZIE A	Yes	Yes	No	No	No	Yes	No											20	Boy	Mother		Yes	9	Yes	15	Yes	2022-07-07	2023-04-07	2023-10-12	9	15	12 to 23 months	25 to 34 years	No	No	No	No	No
924	32	Female	Parent	Married	Others		Between 60.001 and 100.000FCFA	Secondary	Etoug-Ebe	NKOLZIE A	Yes	Yes	No	No	No	Yes	No											24	Girl	Mother		Yes	9	Yes	15	Yes	2022-03-16	2023-01-06	2023-07-13	9	15	24 to 35 months	25 to 34 years	No	No	No	No	No
925	38	Female	Parent	Unmarried	Housekeeper		Between 60.001 and 100.000FCFA	Secondary	Etoug-Ebe	NKOLZIE A	Yes	Yes	No	No	No	Yes	No											28	Boy	Mother		Yes	9	No		Yes	2021-11-11	2022-08-11		9		24 to 35 months	>= 35 years	No		No	No	No
926	26	Female	Parent	Unmarried	Housekeeper		Between 60.001 and 100.000FCFA	Secondary	Etoug-Ebe	NKOLZIE A	Yes	No							No	No	No	No	Yes	No	No	No		33	Girl	Mother		Yes	10	No		Yes	2021-06-10	2022-04-01		9		24 to 35 months	25 to 34 years	No		No	No	No
927	50	Female	Guadian	Married	Others		Between 100.001 and 300.000FCFA	Secondary	Etoug-Ebe	TKC	Yes	Yes	No	No	No	Yes	No											32	Boy	Mother		Yes	9	Yes	15	Yes	2021-07-08	2022-04-08	2022-10-14	9	15	24 to 35 months	>= 35 years	No	No	No	No	No
928	33	Female	Parent	Married	Others		less than 60.000FCFA	Secondary	Etoug-Ebe	TKC	Yes	Yes	Yes	No	No	Yes	No											23	Girl	Mother		Yes	10	Yes	16	Yes	2022-04-15	2023-02-03	2023-08-03	9	15	12 to 23 months	25 to 34 years	No	No	No	No	No
929	38	Male	Parent	Married	Housekeeper		I don't know	Secondary	Etoug-Ebe	TKC	Yes	Yes	Yes	No	No	No	No											26	Boy	Mother		Yes	9	Yes	15	No						24 to 35 months	>= 35 years				No	No
930	30	Female	Guadian	Married	Others		Between 100.001 and 300.000FCFA	Secondary	Etoug-Ebe	TKC	No	No							Yes	Yes	Yes	No	No	Yes	No	No		34	Girl	Mother		Yes	10	Yes	15	No						24 to 35 months	25 to 34 years				Yes	Yes
931	47	Female	Guadian	Married	Others		Between 60.001 and 100.000FCFA	University	Etoug-Ebe	TKC	Yes	Yes	Yes	No	No	Yes	No											29	Boy	Mother		Yes	9	Yes	16	No						24 to 35 months	>= 35 years				No	No
932	28	Female	Parent	Married	Others		less than 60.000FCFA	Secondary	Etoug-Ebe	TKC	Yes	Yes	No	No	No	Yes	No											20	Boy	Mother		Yes	9	No		Yes	2022-07-12	2023-04-14		9		12 to 23 months	25 to 34 years	No		No	No	No
933	36	Female	Parent	Unmarried	Others		Between 60.001 and 100.000FCFA	Secondary	Etoug-Ebe	TKC	Yes	Yes	No	No	No	Yes	No											31	Boy	Mother		Yes	9	Yes	15	Yes	2021-08-31	2022-06-03	2022-12-09	9	15	24 to 35 months	>= 35 years	No	No	No	No	No
934	57	Female	Guadian	Married	Others		Between 100.001 and 300.000FCFA	Secondary	Etoug-Ebe	TKC	Yes	Yes	No	No	No	Yes	No											25	Boy	Mother		Yes	6	Yes	15	No						24 to 35 months	>= 35 years				No	No
935	35	Male	Parent	Married	Others		less than 60.000FCFA	Secondary	Etoug-Ebe	TKC	Yes	Yes	No	No	No	Yes	No											27	Girl	Mother		Yes	9	Yes	15	No						24 to 35 months	>= 35 years				No	No
936	50	Female	Guadian	Married	Others		Between 60.001 and 100.000FCFA	University	Etoug-Ebe	TKC	Yes	Yes	Yes	No	No	Yes	No											30	Girl	Mother		Yes	9	Yes	15	Yes	2021-09-06	2022-06-10	2022-12-14	9	15	24 to 35 months	>= 35 years	No	No	No	No	No
937	45	Female	Parent	Married	Others		Between 100.001 and 300.000FCFA	University	Etoug-Ebe	TKC	Yes	Yes	Yes	Yes	No	Yes	No											33	Boy	Mother		Yes	9	No		Yes	2021-06-17	2022-03-17		9		24 to 35 months	>= 35 years	No		No	No	No
938	39	Female	Parent	Married	Others		Between 60.001 and 100.000FCFA	Secondary	Etoug-Ebe	TKC	Yes	Yes	Yes	No	No	Yes	No											20	Girl	Mother		Yes	9	Yes	15	Yes	2022-07-08	2023-04-13	2023-10-13	9	15	12 to 23 months	>= 35 years	No	No	No	No	No
939	30	Female	Parent	Married	Others		Between 60.001 and 100.000FCFA	University	Etoug-Ebe	TKC	No	No							Yes	No	Yes	Yes	No	No	No	No		15	Girl	Mother		No										12 to 23 months	25 to 34 years				Yes	Yes
940	28	Female	Parent	Married	Others		Between 60.001 and 100.000FCFA	University	Etoug-Ebe	TKC	Yes	Yes	Yes	No	No	Yes	No											16	Boy	Mother		Yes	9	No		Yes	2022-11-16	2023-08-18		9		12 to 23 months	25 to 34 years	No		No	No	No
941	30	Female	Parent	Unmarried	Others		Between 100.001 and 300.000FCFA	University	Etoug-Ebe	TKC	Yes	Yes	No	No	No	Yes	No											14	Girl	Mother		Yes	11	No		Yes	2023-01-10	2023-12-14		11		12 to 23 months	25 to 34 years	Yes		Yes	No	Yes
942	33	Female	Parent	Unmarried	Housekeeper		less than 60.000FCFA	University	Etoug-Ebe	TKC	Yes	Yes	No	No	No	Yes	No											13	Girl	Mother		Yes	12	No		Yes	2023-02-10	2024-02-23		12		12 to 23 months	25 to 34 years	Yes		Yes	No	Yes
943	33	Female	Parent	Unmarried	Others		Between 100.001 and 300.000FCFA	University	Etoug-Ebe	TKC	Yes	Yes	Yes	No	No	No	No											12	Girl	Mother		Yes	0	No		Yes	2023-03-10	2023-12-11		9		12 to 23 months	25 to 34 years	No		No	No	No
944	27	Male	Parent	Married	Others		Between 100.001 and 300.000FCFA	University	Etoug-Ebe	TKC	Yes	Yes	Yes	Yes	No	Yes	No											12	Boy	Mother		I don't know		No		No						12 to 23 months	25 to 34 years				No	No
945	40	Female	Parent	Married	Housekeeper		Between 60.001 and 100.000FCFA	Secondary	Etoug-Ebe	ZIBI	Yes	Yes	No	No	Yes	Yes	No											25	Boy	Mother		Yes	10	Yes	15	Yes	2022-02-12	2022-11-14	2023-05-19	9	15	24 to 35 months	>= 35 years	No	No	No	No	No
946	33	Female	Parent	Unmarried	Housekeeper		I don't know	Secondary	Etoug-Ebe	ZIBI	Yes	Yes	No	No	No	Yes	No											18	Girl	Mother		Yes	11	No		Yes	2022-09-09	2023-08-04		10		12 to 23 months	25 to 34 years	Yes		Yes	No	Yes
947	39	Male	Parent	Unmarried	Others		Between 100.001 and 300.000FCFA	University	Etoug-Ebe	ZIBI	Yes	Yes	Yes	Yes	Yes	Yes	No											17	Girl	Father		Yes	10	No		Yes	2022-10-10	2023-07-14		9		12 to 23 months	>= 35 years	No		No	No	No
948	33	Female	Parent	Unmarried	Housekeeper		I don't know	Primary	Etoug-Ebe	ZIBI	Yes	Yes	Yes	No	No	Yes	No											14	Girl	Mother		Yes	0	No		No						12 to 23 months	25 to 34 years				No	No
949	30	Female	Parent	Married	Others		Between 60.001 and 100.000FCFA	University	Etoug-Ebe	ZIBI	Yes	No							Yes	Yes	Yes	No	No	Yes	No	No		15	Girl	Mother		No										12 to 23 months	25 to 34 years				No	No
950	25	Female	Parent	Unmarried	Others		Between 100.001 and 300.000FCFA	University	Etoug-Ebe	ZIBI	Yes	Yes	No	No	No	Yes	No											16	Girl	Aunt		Yes	10	No		Yes	2022-11-27	2023-08-30		9		12 to 23 months	25 to 34 years	No		No	No	No
951	32	Female	Parent	Married	Others		Between 60.001 and 100.000FCFA	Secondary	Etoug-Ebe	ZIBI	No	No							No	Yes	Yes	Yes	No	No	No	No		15	Boy	Mother		No										12 to 23 months	25 to 34 years				Yes	Yes
952	29	Female	Parent	Married	Others		less than 60.000FCFA	University	Etoug-Ebe	ZIBI	Yes	Yes	Yes	No	No	Yes	No											14	Girl	Mother		Yes	9	No		Yes	2023-01-07	2023-10-11		9		12 to 23 months	25 to 34 years	No		No	No	No
953	30	Female	Parent	Unmarried	Others		Between 100.001 and 300.000FCFA	University	Etoug-Ebe	ZIBI	Yes	Yes	Yes	Yes	No	Yes	No											24	Boy	Mother		Yes	9	No		Yes	2022-03-25	2023-10-06		18		24 to 35 months	25 to 34 years	Yes		Yes	No	Yes
954	35	Female	Guadian	Married	Others		Between 60.001 and 100.000FCFA	Secondary	Etoug-Ebe	JOHANNESBURG	Yes	Yes	Yes	No	No	No	No											18	Girl	Mother		Yes	9	No		Yes	2022-09-20	2023-06-20		9		12 to 23 months	>= 35 years	No		No	No	No
955	22	Male	Parent	Unmarried	Others		less than 60.000FCFA	University	Etoug-Ebe	JOHANNESBURG	Yes	Yes	No	No	Yes	Yes	No											18	Girl	Mother		Yes	0	No		No						12 to 23 months	<= 24 years				No	No
956	30	Female	Parent	Unmarried	Others		less than 60.000FCFA	University	Etoug-Ebe	JOHANNESBURG	Yes	Yes	Yes	No	No	Yes	No											20	Girl	Mother		Yes	12	Yes	15	Yes	2022-07-16	2023-07-03	2024-01-05	11	17	12 to 23 months	25 to 34 years	Yes	No	Yes	No	Yes
957	27	Female	Parent	Married	Housekeeper		I don't know	University	Etoug-Ebe	JOHANNESBURG	Yes	Yes	No	No	Yes	Yes	No											18	Girl	Mother		Yes	9	No		Yes	2022-09-13	2023-06-16		9		12 to 23 months	25 to 34 years	No		No	No	No
958	19	Female	Parent	Unmarried	Others		I don't know	Secondary	Etoug-Ebe	JOHANNESBURG	Yes	Yes	No	No	No	Yes	No											14	Boy	Mother		No										12 to 23 months	<= 24 years				No	No
959	29	Female	Parent	Married	Housekeeper		I don't know	Secondary	Etoug-Ebe	JOHANNESBURG	Yes	Yes	No	No	Yes	No	No											13	Boy	Mother		Yes	0	No		Yes	2023-02-11	2023-11-16		9		12 to 23 months	25 to 34 years	No		No	No	No
960	29	Female	Parent	Married	Others		Between 60.001 and 100.000FCFA	University	Etoug-Ebe	JOHANNESBURG	No	No							No	No	Yes	No	No	Yes	No	No		13	Boy	Mother		No										12 to 23 months	25 to 34 years				Yes	Yes
961	32	Male	Guadian	Unmarried	Others		Between 60.001 and 100.000FCFA	University	Etoug-Ebe	JOHANNESBURG	Yes	No							No	No	No	No	Yes	No	No	No		24	Boy	Father		No										24 to 35 months	25 to 34 years				No	No
962	30	Female	Parent	Married	Others		Between 60.001 and 100.000FCFA	University	Etoug-Ebe	JOHANNESBURG	Yes	Yes	Yes	No	No	Yes	No											25	Girl	Mother		Yes	0	No		Yes	2022-02-18	2022-11-18		9		24 to 35 months	25 to 34 years	No		No	No	No
963	18	Female	Parent	Unmarried	Others		I don't know	Secondary	Etoug-Ebe	JOHANNESBURG	Yes	Yes	No	Yes	No	No	No											12	Boy	Others	grand Mother	No										12 to 23 months	<= 24 years				No	No
964	28	Female	Parent	Married	Housekeeper		I don't know	Secondary	Etoug-Ebe	JOHANNESBURG	Yes	Yes	Yes	No	No	Yes	No											22	Boy	Mother		Yes	12	Yes	15	No						12 to 23 months	25 to 34 years				No	No
965	30	Female	Parent	Married	Housekeeper		I don't know	Secondary	Etoug-Ebe	JOHANNESBURG	Yes	Yes	Yes	No	No	Yes	No											13	Boy	Mother		Yes	0	No		Yes	2023-02-20	2023-11-20		9		12 to 23 months	25 to 34 years	No		No	No	No
966	35	Female	Parent	Married	Others		Between 60.001 and 100.000FCFA	University	Etoug-Ebe	JOHANNESBURG	No	No							No	No	No	Yes	No	No	No	No		18	Girl	Mother		No										12 to 23 months	>= 35 years				Yes	Yes
967	20	Female	Parent	Unmarried	Others		I don't know	Secondary	Etoug-Ebe	JOHANNESBURG	Yes	Yes	Yes	No	No	Yes	No											15	Boy	Mother		Yes	0	No		Yes	2022-12-10	2023-09-13		9		12 to 23 months	<= 24 years	No		No	No	No
968	30	Female	Parent	Married	Housekeeper		Between 60.001 and 100.000FCFA	Secondary	Etoug-Ebe	JOHANNESBURG	Yes	Yes	No	No	No	Yes	No											17	Girl	Mother		Yes	0	Yes	0	No						12 to 23 months	25 to 34 years				No	No
969	18	Female	Parent	Unmarried	Others		I don't know	Secondary	Etoug-Ebe	JOHANNESBURG	Yes	Yes	No	No	Yes	No	No											19	Boy	Mother		Yes	0	Yes	0	No						12 to 23 months	<= 24 years				No	No
970	30	Female	Parent	Married	Others		Between 60.001 and 100.000FCFA	Secondary	Etoug-Ebe	JOHANNESBURG	Yes	Yes	No	Yes	No	Yes	No											15	Girl	Mother		Yes	9	Yes	15	Yes	2022-12-12	2023-09-12	2024-03-15	9	15	12 to 23 months	25 to 34 years	No	No	No	No	No
971	27	Female	Parent	Unmarried	Others		I don't know	University	Etoug-Ebe	JOHANNESBURG	Yes	Yes	Yes	No	No	No	No											12	Boy	Mother		Yes	0	No		Yes	2023-03-22	2023-12-22		9		12 to 23 months	25 to 34 years	No		No	No	No
972	26	Female	Parent	Married	Housekeeper		less than 60.000FCFA	Secondary	Etoug-Ebe	JOHANNESBURG	Yes	Yes	Yes	No	No	Yes	No											20	Boy	Mother		No										12 to 23 months	25 to 34 years				No	No
973	22	Female	Parent	Unmarried	Others		Between 60.001 and 100.000FCFA	Secondary	Etoug-Ebe	JOHANNESBURG	Yes	Yes	No	Yes	No	Yes	No											16	Girl	Mother		Yes	9	No		Yes	2022-11-09	2023-08-09		9		12 to 23 months	<= 24 years	No		No	No	No
974	25	Female	Parent	Unmarried	Housekeeper		less than 60.000FCFA	University	Etoug-Ebe	JOHANNESBURG	Yes	Yes	Yes	No	No	No	No											18	Girl	Mother		Yes	9	No		Yes	2022-09-10	2023-06-16		9		12 to 23 months	25 to 34 years	No		No	No	No
975	34	Female	Parent	Unmarried	Housekeeper		I don't know	Secondary	Etoug-Ebe	JOHANNESBURG	Yes	Yes	No	No	No	Yes	No											23	Girl	Mother		Yes	9	No		Yes	2022-04-13	2023-01-13		9		12 to 23 months	25 to 34 years	No		No	No	No
976	28	Female	Parent	Married	Housekeeper		Between 60.001 and 100.000FCFA	Secondary	Etoug-Ebe	JOHANNESBURG	Yes	Yes	No	No	No	Yes	No											13	Girl	Mother		No										12 to 23 months	25 to 34 years				No	No
977	40	Female	Parent	Married	Others		Between 100.001 and 300.000FCFA	University	Etoug-Ebe	JOHANNESBURG	Yes	Yes	Yes	No	Yes	No	No											25	Girl	Mother		Yes	9	No		Yes	2022-02-06	2022-11-10		9		24 to 35 months	>= 35 years	No		No	No	No
978	38	Female	Parent	Married	Others		Between 100.001 and 300.000FCFA	University	Etoug-Ebe	DERRIERE CAMP SIC	Yes	Yes	Yes	No	No	Yes	No											14	Girl	Mother		Yes	10	No		Yes	2023-01-16	2023-10-16		9		12 to 23 months	>= 35 years	No		No	No	No
979	28	Female	Parent	Unmarried	Others		less than 60.000FCFA	University	Etoug-Ebe	DERRIERE CAMP SIC	Yes	Yes	No	No	No	Yes	No											12	Girl	Mother		No										12 to 23 months	25 to 34 years				No	No
980	20	Female	Parent	Unmarried	Others		I don't know	Secondary	Etoug-Ebe	DERRIERE CAMP SIC	Yes	No							Yes	No	Yes	No	No	No	No	No		13	Girl	Mother		No										12 to 23 months	<= 24 years				No	No
981	24	Female	Parent	Unmarried	Others		Between 60.001 and 100.000FCFA	University	Etoug-Ebe	DERRIERE CAMP SIC	Yes	Yes	Yes	No	No	Yes	No											24	Boy	Mother		Yes	9	Yes	15	Yes	2022-03-03	2022-12-05	2023-06-09	9	15	24 to 35 months	<= 24 years	No	No	No	No	No
982	45	Male	Parent	Married	Others		Between 100.001 and 300.000FCFA	University	Etoug-Ebe	DERRIERE CAMP SIC	Yes	Yes	No	No	No	Yes	No											24	Boy	Mother		I don't know		I don't know		No						24 to 35 months	>= 35 years				No	No
983	40	Female	Parent	Married	Others		Between 100.001 and 300.000FCFA	University	Etoug-Ebe	DERRIERE CAMP SIC	Yes	Yes	Yes	Yes	Yes	Yes	No											23	Boy	Mother		Yes	9	Yes	15	No						12 to 23 months	>= 35 years				No	No
984	27	Female	Parent	Unmarried	Others		More than 300.000FCFA	University	Etoug-Ebe	DERRIERE CAMP SIC	Yes	Yes	Yes	Yes	Yes	Yes	No											18	Boy	Mother		Yes	10	Yes	17	Yes	2022-08-11	2023-06-15	2023-12-15	10	16	12 to 23 months	25 to 34 years	Yes	No	Yes	No	Yes
985	32	Female	Parent	Married	Others		Between 100.001 and 300.000FCFA	University	Etoug-Ebe	DERRIERE CAMP SIC	Yes	Yes	No	No	No	Yes	No											24	Girl	Mother		Yes	9	Yes	15	No						24 to 35 months	25 to 34 years				No	No
986	34	Female	Parent	Married	Others		Between 60.001 and 100.000FCFA	Secondary	Etoug-Ebe	DERRIERE CAMP SIC	Yes	Yes	No	No	Yes	Yes	No											14	Girl	Mother		Yes	9	No		Yes	2023-01-16	2023-11-16		10		12 to 23 months	25 to 34 years	Yes		Yes	No	Yes
987	47	Male	Parent	Married	Others		Between 60.001 and 100.000FCFA	Secondary	Etoug-Ebe	DERRIERE CAMP SIC	Yes	Yes	No	No	No	Yes	No											28	Girl	Father		I don't know		I don't know		No						24 to 35 months	>= 35 years				No	No
988	45	Female	Guadian	Married	Others		Between 100.001 and 300.000FCFA	Secondary	Etoug-Ebe	DERRIERE CAMP SIC	Yes	Yes	No	No	No	Yes	No											16	Girl	Mother		I don't know		I don't know		No						12 to 23 months	>= 35 years				No	No
989	30	Female	Parent	Unmarried	Others		less than 60.000FCFA	University	Etoug-Ebe	DERRIERE CAMP SIC	Yes	Yes	No	No	No	Yes	No											32	Girl	Mother		Yes	0	Yes	0	Yes	2021-07-07	2022-04-07	2022-10-07	9	15	24 to 35 months	25 to 34 years	No	No	No	No	No
990	33	Female	Parent	Married	Others		Between 100.001 and 300.000FCFA	Secondary	Etoug-Ebe	DERRIERE CAMP SIC	Yes	Yes	No	Yes	No	Yes	No											14	Girl	Mother		I don't know		No		Yes	2023-01-01	2023-10-06		9		12 to 23 months	25 to 34 years	No		No	No	No
991	25	Female	Parent	Unmarried	Others		I don't know	Secondary	Etoug-Ebe	DERRIERE CAMP SIC	Yes	No							Yes	No	No	No	No	No	No	No		14	Boy	Mother		No										12 to 23 months	25 to 34 years				No	No
992	40	Female	Parent	Married	Others		I don't know	Secondary	Etoug-Ebe	DERRIERE CAMP SIC	Yes	Yes	No	No	No	Yes	No											16	Girl	Mother		No										12 to 23 months	>= 35 years				No	No
993	45	Male	Parent	Married	Others		Between 60.001 and 100.000FCFA	Secondary	Nkolbikok	BLOC 2	Yes	Yes	Yes	Yes	Yes	Yes	No											13	Girl	Father		No										12 to 23 months	>= 35 years				No	No
994	40	Female	Parent	Married	Others		less than 60.000FCFA	University	Nkolbikok	BLOC 2	Yes	Yes	Yes	No	No	Yes	No											14	Girl	Mother		Yes	0	No		Yes	2023-02-05	2023-11-08		9		12 to 23 months	>= 35 years	No		No	No	No
995	30	Female	Parent	Unmarried	Others		Between 60.001 and 100.000FCFA	Secondary	Nkolbikok	BLOC 2	Yes	Yes	Yes	No	No	No	No											26	Boy	Father		No										24 to 35 months	25 to 34 years				No	No
996	25	Male	Guadian	Unmarried	Others	Student	Between 60.001 and 100.000FCFA	University	Nkolbikok	BLOC 2	No	No							Yes	No	No	No	No	No	No	No		14	Girl	Others	grand Mother	No										12 to 23 months	25 to 34 years				Yes	Yes
997	33	Female	Parent	Married	Others		Between 100.001 and 300.000FCFA	University	Nkolbikok	BLOC 2	Yes	Yes	Yes	Yes	No	Yes	No											12	Boy	Mother		Yes	0	No		Yes	2023-03-18	2023-12-18		9		12 to 23 months	25 to 34 years	No		No	No	No
998	28	Female	Parent	Unmarried	Others		less than 60.000FCFA	Secondary	Nkolbikok	BLOC 2	Yes	Yes	Yes	No	No	Yes	No											12	Girl	Mother		Yes	9	No		Yes	2023-03-16	2023-12-22		9		12 to 23 months	25 to 34 years	No		No	No	No
999	26	Female	Parent	Unmarried	Others		less than 60.000FCFA	Primary	Nkolbikok	BLOC 2	No	No							Yes	No	Yes	Yes	No	No	No	No		22	Boy	Mother		No										12 to 23 months	25 to 34 years				Yes	Yes
1000	36	Female	Guadian	Unmarried	Others		Between 60.001 and 100.000FCFA	Primary	Nkolbikok	BLOC 2	Yes	Yes	Yes	Yes	Yes	No	No											15	Girl	Aunt		I don't know		I don't know		No						12 to 23 months	>= 35 years				No	No
1001	30	Female	Guadian	Unmarried	Housekeeper		Between 100.001 and 300.000FCFA	University	Nkolbikok	BLOC 2	Yes	Yes	No	No	No	Yes	No											12	Boy	Mother		Yes	9	No		Yes	2023-03-16	2023-12-22		9		12 to 23 months	25 to 34 years	No		No	No	No
1002	18	Female	Parent	Unmarried	Others		less than 60.000FCFA	Secondary	Nkolbikok	BLOC 2	Yes	Yes	Yes	Yes	Yes	Yes	No											15	Boy	Mother		Yes	9	Yes	15	Yes	2022-12-07	2023-09-07	2024-03-07	9	15	12 to 23 months	<= 24 years	No	No	No	No	No
1003	26	Female	Parent	Unmarried	Others		Between 100.001 and 300.000FCFA	University	Nkolbikok	BLOC 2	Yes	Yes	Yes	Yes	No	Yes	No											30	Girl	Father		Yes	12	Yes	17	Yes	2021-05-25	2022-05-10	2022-10-05	11	16	24 to 35 months	25 to 34 years	Yes	No	Yes	No	Yes
1004	36	Female	Guadian	Unmarried	Others		Between 100.001 and 300.000FCFA	Secondary	Nkolbikok	BLOC 2	No	No							No	Yes	Yes	No	No	No	No	No		13	Girl	Aunt		I don't know		I don't know		No						12 to 23 months	>= 35 years				Yes	Yes
1005	39	Male	Guadian	Unmarried	Others		I don't know	Secondary	Nkolbikok	BLOC 2	No	No							No	Yes	No	No	No	Yes	No	No		23	Girl	Mother		No										12 to 23 months	>= 35 years				Yes	Yes
1006	26	Female	Parent	Unmarried	Housekeeper		Between 60.001 and 100.000FCFA	None	Nkolbikok	BLOC 2	Yes	Yes	No	Yes	No	Yes	No											28	Girl	Mother		No										24 to 35 months	25 to 34 years				No	No
1007	20	Male	Parent	Unmarried	Others	Student	I don't know	Secondary	Nkolbikok	CHEFFERIE ELIG-EFFA	Yes	Yes	No	No	No	Yes	No											13	Girl	Father		No										12 to 23 months	<= 24 years				No	No
1008	45	Female	Parent	Married	Others		Between 100.001 and 300.000FCFA	University	Nkolbikok	CHEFFERIE ELIG-EFFA	Yes	Yes	No	No	No	Yes	No											24	Boy	Mother		Yes	0	Yes	0	No						24 to 35 months	>= 35 years				No	No
1009	33	Female	Parent	Unmarried	Others		Between 60.001 and 100.000FCFA	University	Nkolbikok	CHEFFERIE ELIG-EFFA	Yes	Yes	Yes	Yes	No	Yes	No											18	Girl	Mother		No										12 to 23 months	25 to 34 years				No	No
1010	33	Male	Parent	Unmarried	Housekeeper		less than 60.000FCFA	Primary	Nkolbikok	CHEFFERIE ELIG-EFFA	No	No							No	Yes	No	No	No	No	No	No		29	Girl	Uncle		No										24 to 35 months	25 to 34 years				Yes	Yes
1011	41	Male	Parent	Married	Others		Between 100.001 and 300.000FCFA	University	Nkolbikok	CHEFFERIE ELIG-EFFA	Yes	Yes	Yes	No	No	No	No											35	Boy	Mother		No										24 to 35 months	>= 35 years				No	No
1012	34	Male	Parent	Unmarried	Others		less than 60.000FCFA	Secondary	Nkolbikok	CHEFFERIE ELIG-EFFA	Yes	Yes	Yes	No	No	No	No											22	Boy	Mother		Yes	9	Yes	15	No						12 to 23 months	25 to 34 years				No	No
1013	31	Female	Parent	Married	Others		Between 100.001 and 300.000FCFA	University	Nkolbikok	CHEFFERIE ELIG-EFFA	Yes	No							No	Yes	Yes	No	No	No	No	No		18	Girl	Mother		Yes	9	Yes	15	Yes	2022-06-30	2023-05-03	2024-01-15	10	18	12 to 23 months	25 to 34 years	Yes	No	Yes	No	Yes
1014	38	Female	Parent	Married	Others		less than 60.000FCFA	Secondary	Nkolbikok	CHEFFERIE ELIG-EFFA	Yes	Yes	Yes	No	No	No	No											16	Boy	Mother		Yes	0	No		Yes	2022-11-03	2023-08-04		9		12 to 23 months	>= 35 years	No		No	No	No
1015	28	Female	Parent	Unmarried	Housekeeper		Between 60.001 and 100.000FCFA	Secondary	Nkolbikok	CHEFFERIE ELIG-EFFA	Yes	Yes	No	Yes	No	No	No											18	Girl	Mother		Yes	9	No		Yes	2022-09-16	2023-06-16		9		12 to 23 months	25 to 34 years	No		No	No	No
1016	40	Female	Parent	Married	Others		Between 60.001 and 100.000FCFA	University	Nkolbikok	CHEFFERIE ELIG-EFFA	No	Yes	Yes	No	No	Yes	No											18	Girl	Aunt		No										12 to 23 months	>= 35 years				No	No
1017	32	Female	Parent	Unmarried	Others		Between 60.001 and 100.000FCFA	University	Nkolbikok	CHEFFERIE ELIG-EFFA	Yes	Yes	No	Yes	No	No	No											27	Boy	Aunt		No										24 to 35 months	25 to 34 years				No	No
1018	33	Female	Parent	Married	Others		More than 300.000FCFA	University	Nkolbikok	CHEFFERIE ELIG-EFFA	Yes	Yes	Yes	No	No	Yes	No											28	Boy	Sister		Yes	9	Yes	15	Yes	2021-12-02	2022-09-02	2023-03-03	9	15	24 to 35 months	25 to 34 years	No	No	No	No	No
1019	22	Female	Parent	Unmarried	Others	Student	I don't know	Secondary	Nkolbikok	CHEFFERIE ELIG-EFFA	No	No							Yes	No	Yes	No	No	Yes	No	No		13	Girl	Mother		Yes	9	No		No						12 to 23 months	<= 24 years				Yes	Yes
1020	35	Male	Parent	Married	Others		Between 100.001 and 300.000FCFA	University	Nkolbikok	CHEFFERIE ELIG-EFFA	Yes	Yes	No	Yes	Yes	Yes	No											12	Girl	Father		Yes	9	No		Yes	2023-03-09	2023-12-14		9		12 to 23 months	>= 35 years	No		No	No	No
1021	28	Female	Guadian	Unmarried	Others	Student	I don't know	University	Nkolbikok	MELEN 7B	Yes	Yes	Yes	No	No	No	No											22	Girl	Mother		I don't know		I don't know		No						12 to 23 months	25 to 34 years				No	No
1022	23	Female	Parent	Unmarried	Others		Between 60.001 and 100.000FCFA	University	Nkolbikok	MELEN 7B	Yes	Yes	No	Yes	No	Yes	No											13	Girl	Mother		Yes	9	No		Yes	2023-02-09	2023-11-09		9		12 to 23 months	<= 24 years	No		No	No	No
1023	28	Female	Parent	Married	Others		I don't know	Secondary	Nkolbikok	MELEN 7B	Yes	Yes	No	No	No	Yes	No											22	Girl	Mother		I don't know		I don't know		No						12 to 23 months	25 to 34 years				No	No
1024	31	Female	Guadian	Unmarried	Housekeeper		less than 60.000FCFA	Secondary	Nkolbikok	MELEN 7B	Yes	Yes	No	No	No	Yes	No											24	Boy	Cousine		Yes	0	No		Yes	2022-03-23	2022-12-23		9		24 to 35 months	25 to 34 years	No		No	No	No
1025	35	Male	Parent	Married	Others		Between 60.001 and 100.000FCFA	University	Nkolbikok	MELEN 7B	Yes	Yes	Yes	No	No	No	No											22	Boy	Mother		No										12 to 23 months	>= 35 years				No	No
1026	41	Female	Parent	Married	Others		Between 100.001 and 300.000FCFA	Secondary	Nkolbikok	MELEN 7B	Yes	Yes	Yes	No	No	Yes	No											12	Girl	Mother		Yes	9	No		Yes	2023-03-03	2023-12-06		9		12 to 23 months	>= 35 years	No		No	No	No
1027	29	Male	Parent	Married	Others		Between 60.001 and 100.000FCFA	University	Nkolbikok	MELEN 7B	Yes	Yes	No	No	No	No	No											14	Girl	Mother		Yes	9	No		Yes	2023-01-12	2023-11-03		9		12 to 23 months	25 to 34 years	No		No	No	No
1028	34	Female	Guadian	Unmarried	Others		less than 60.000FCFA	Secondary	Nkolbikok	MELEN 7B	Yes	Yes	Yes	No	No	Yes	No											22	Girl	Mother		No										12 to 23 months	25 to 34 years				No	No
1029	38	Female	Parent	Unmarried	Others		Between 100.001 and 300.000FCFA	University	Nkolbikok	MELEN 7B	No	No							Yes	No	Yes	No	No	Yes	No	No		31	Girl	Mother		No										24 to 35 months	>= 35 years				Yes	Yes
1030	25	Female	Parent	Unmarried	Others		Between 60.001 and 100.000FCFA	Primary	Nkolbikok	MELEN 7B	No	No							No	No	Yes	No	No	No	No	No		24	Boy	Mother		I don't know		No		No						24 to 35 months	25 to 34 years				Yes	Yes
1031	32	Male	Parent	Unmarried	Others		Between 60.001 and 100.000FCFA	University	Nkolbikok	MELEN 7B	Yes	Yes	No	No	Yes	No	No											19	Boy	Father		Yes	9	Yes	15	Yes	2022-08-05	2023-05-05	2023-11-10	9	15	12 to 23 months	25 to 34 years	No	No	No	No	No
1032	36	Female	Parent	Unmarried	Others		Between 60.001 and 100.000FCFA	University	Nkolbikok	MELEN 7B	Yes	Yes	No	No	Yes	No	No											14	Boy	Father		Yes	10	No		Yes	2023-01-10	2023-10-13		9		12 to 23 months	>= 35 years	No		No	No	No
1033	35	Female	Parent	Unmarried	Others		Between 60.001 and 100.000FCFA	University	Nkolbikok	MELEN 7B	Yes	Yes	No	No	Yes	No	No											21	Boy	Father		I don't know		I don't know		No						12 to 23 months	>= 35 years				No	No
1034	28	Female	Parent	Unmarried	Others		Between 60.001 and 100.000FCFA	University	Nkolbikok	MELEN 7B	Yes	Yes	No	No	Yes	No	No											20	Boy	Mother		Yes	9	Yes	15	No						12 to 23 months	25 to 34 years				No	No
1035	26	Female	Parent	Unmarried	Others		Between 60.001 and 100.000FCFA	Secondary	Nkolbikok	CHEFFERIE NKOLBIKOK	Yes	Yes	No	No	No	Yes	No											20	Boy	Mother		No										12 to 23 months	25 to 34 years				No	No
1036	29	Female	Parent	Unmarried	Others		Between 60.001 and 100.000FCFA	Secondary	Nkolbikok	CHEFFERIE NKOLBIKOK	Yes	Yes	No	No	Yes	No	No											24	Boy	Aunt		Yes	10	No		Yes	2022-03-23	2022-12-23		9		24 to 35 months	25 to 34 years	No		No	No	No
1037	25	Male	Parent	Unmarried	Others		Between 60.001 and 100.000FCFA	Secondary	Nkolbikok	CHEFFERIE NKOLBIKOK	Yes	Yes	No	No	No	Yes	No											24	Boy	Father		I don't know		I don't know		Yes	2022-03-05	2022-12-09	2023-06-09	9	15	24 to 35 months	25 to 34 years	No	No	No	No	No
1038	32	Female	Parent	Unmarried	Others		Between 60.001 and 100.000FCFA	Primary	Nkolbikok	CHEFFERIE NKOLBIKOK	Yes	Yes	Yes	No	No	Yes	No											13	Boy	Mother		Yes	9	No		Yes	2023-02-19	2023-12-05		9		12 to 23 months	25 to 34 years	No		No	No	No
1039	39	Female	Parent	Married	Others		Between 60.001 and 100.000FCFA	Secondary	Nkolbikok	CHEFFERIE NKOLBIKOK	Yes	Yes	Yes	No	No	Yes	No											12	Boy	Mother		Yes	0	No		No						12 to 23 months	>= 35 years				No	No
1040	29	Female	Parent	Unmarried	Others		less than 60.000FCFA	Secondary	Nkolbikok	CHEFFERIE NKOLBIKOK	Yes	Yes	No	No	No	Yes	No											20	Boy	Mother		Yes	9	No		Yes	2022-07-05	2023-04-07		9		12 to 23 months	25 to 34 years	No		No	No	No
1041	32	Female	Guadian	Married	Housekeeper		less than 60.000FCFA	Secondary	Nkolbikok	CHEFFERIE NKOLBIKOK	No	No							No	Yes	No	Yes	No	No	No	No		32	Girl	Mother		No										24 to 35 months	25 to 34 years				Yes	Yes
1042	27	Female	Parent	Married	Others		Between 100.001 and 300.000FCFA	Secondary	Nkolbikok	CHEFFERIE NKOLBIKOK	Yes	Yes	Yes	No	No	No	No											22	Boy	Mother		I don't know		No		Yes	2022-05-16	2023-02-16		9		12 to 23 months	25 to 34 years	No		No	No	No
1043	34	Female	Parent	Married	Others		Between 60.001 and 100.000FCFA	University	Nkolbikok	CHEFFERIE NKOLBIKOK	Yes	Yes	No	No	No	Yes	No											34	Girl	Aunt		I don't know		I don't know		No						24 to 35 months	25 to 34 years				No	No
1044	29	Female	Parent	Married	Housekeeper		I don't know	Secondary	Nkolbikok	CHEFFERIE NKOLBIKOK	Yes	Yes	No	No	No	Yes	No											28	Girl	Aunt		Yes	0	No		Yes	2021-11-04	2022-08-05		9		24 to 35 months	25 to 34 years	No		No	No	No
1045	36	Female	Parent	Married	Others		More than 300.000FCFA	Secondary	Nkolbikok	CHEFFERIE NKOLBIKOK	Yes	Yes	No	No	No	Yes	No											25	Boy	Mother		Yes	9	Yes	15	Yes	2022-02-08	2022-11-11	2023-05-12	9	15	24 to 35 months	>= 35 years	No	No	No	No	No
1046	29	Male	Guadian	Unmarried	Others		Between 60.001 and 100.000FCFA	Secondary	Nkolbikok	CHEFFERIE NKOLBIKOK	Yes	Yes	Yes	No	No	No	No											25	Boy	Father		I don't know		I don't know		No						24 to 35 months	25 to 34 years				No	No
1047	32	Female	Parent	Married	Others		Between 60.001 and 100.000FCFA	University	Nkolbikok	CHEFFERIE NKOLBIKOK	Yes	Yes	Yes	No	No	No	No											15	Girl	Mother		I don't know		I don't know		No						12 to 23 months	25 to 34 years				No	No
1048	35	Female	Parent	Married	Others		Between 60.001 and 100.000FCFA	Secondary	Nkolbikok	TRADEX NKOLBIKOK	Yes	Yes	No	No	No	Yes	No											22	Boy	Mother		Yes	9	No		Yes	2022-05-12	2023-11-16		18		12 to 23 months	>= 35 years	Yes		Yes	No	Yes
1049	38	Female	Parent	Unmarried	Others		Between 60.001 and 100.000FCFA	Secondary	Nkolbikok	TRADEX NKOLBIKOK	Yes	Yes	Yes	No	No	No	No											22	Boy	Mother		No										12 to 23 months	>= 35 years				No	No
1050	27	Male	Parent	Married	Others		less than 60.000FCFA	Secondary	Nkolbikok	TRADEX NKOLBIKOK	Yes	Yes	Yes	No	No	No	No											23	Girl	Mother		I don't know		No		Yes	2022-03-04	2022-12-09		9		12 to 23 months	25 to 34 years	No		No	No	No
1051	28	Female	Parent	Married	Others		Between 60.001 and 100.000FCFA	Secondary	Nkolbikok	TRADEX NKOLBIKOK	Yes	Yes	Yes	No	No	No	No											13	Girl	Mother		Yes	9	No		Yes	2023-02-11	2023-11-16		9		12 to 23 months	25 to 34 years	No		No	No	No
1052	30	Female	Parent	Married	Others		Between 60.001 and 100.000FCFA	Secondary	Nkolbikok	TRADEX NKOLBIKOK	Yes	Yes	Yes	No	No	Yes	No											25	Boy	Mother		Yes	0	No		Yes	2022-02-06	2022-11-10		9		24 to 35 months	25 to 34 years	No		No	No	No
1053	41	Male	Parent	Married	Others		Between 100.001 and 300.000FCFA	University	Nkolbikok	TRADEX NKOLBIKOK	No	No							No	Yes	Yes	Yes	No	No	No	No		12	Boy	Father		No										12 to 23 months	>= 35 years				Yes	Yes
1054	27	Female	Parent	Married	Others		Between 100.001 and 300.000FCFA	University	Nkolbikok	TRADEX NKOLBIKOK	Yes	Yes	No	No	No	Yes	No											23	Boy	Mother		Yes	9	Yes	15	Yes	2022-04-12	2023-01-12	2023-07-14	9	15	12 to 23 months	25 to 34 years	No	No	No	No	No
1055	28	Female	Parent	Unmarried	Others		less than 60.000FCFA	Secondary	Nkolbikok	TRADEX NKOLBIKOK	Yes	Yes	No	No	No	Yes	No											30	Girl	Mother		I don't know		I don't know		No						24 to 35 months	25 to 34 years				No	No
1056	22	Female	Parent	Unmarried	Others		Between 60.001 and 100.000FCFA	Secondary	Nkolbikok	TRADEX NKOLBIKOK	Yes	Yes	Yes	No	No	Yes	No											16	Boy	Mother		No										12 to 23 months	<= 24 years				No	No
1057	28	Female	Parent	Unmarried	Others		less than 60.000FCFA	Secondary	Nkolbikok	TRADEX NKOLBIKOK	Yes	Yes	Yes	No	No	No	No											23	Boy	Father		Yes	9	No		Yes	2022-04-01	2023-01-05		9		12 to 23 months	25 to 34 years	No		No	No	No
1058	27	Female	Parent	Unmarried	Others		Between 60.001 and 100.000FCFA	University	Nkolbikok	TRADEX NKOLBIKOK	Yes	Yes	No	No	Yes	Yes	No											18	Boy	Mother		Yes	0	I don't know		No						12 to 23 months	25 to 34 years				No	No
1059	28	Female	Parent	Unmarried	Others		Between 60.001 and 100.000FCFA	University	Nkolbikok	TRADEX NKOLBIKOK	No	No							Yes	No	No	No	No	Yes	No	No		29	Girl	Mother		No										24 to 35 months	25 to 34 years				Yes	Yes
1060	40	Female	Parent	Unmarried	Others		Between 60.001 and 100.000FCFA	University	Nkolbikok	TRADEX NKOLBIKOK	No	No							Yes	No	No	No	No	Yes	No	No		19	Boy	Mother		No										12 to 23 months	>= 35 years				Yes	Yes
1061	20	Female	Guadian	Unmarried	Others	Student	I don't know	Secondary	Biscuiterie	boulangerie fran!aise	Yes	No							Yes	No	Yes	No	No	No	No	No		18	Girl	Mother		No										12 to 23 months	<= 24 years				No	No
1062	35	Female	Parent	Married	Others		Between 100.001 and 300.000FCFA	University	Biscuiterie	boulangerie fran!aise	Yes	Yes	Yes	No	No	No	No											16	Boy	Father		Yes	9	No		Yes	2022-11-08	2023-08-11		9		12 to 23 months	>= 35 years	No		No	No	No
1063	40	Female	Parent	Married	Others		Between 60.001 and 100.000FCFA	University	Biscuiterie	boulangerie fran!aise	Yes	Yes	Yes	No	No	Yes	No											19	Girl	Mother		Yes	0	No		Yes	2022-08-05	2023-05-05		9		12 to 23 months	>= 35 years	No		No	No	No
1064	33	Female	Parent	Married	Others		Between 60.001 and 100.000FCFA	University	Biscuiterie	boulangerie fran!aise	Yes	Yes	Yes	No	No	No	No											13	Girl	Mother		Yes	9	No		Yes	2023-02-22	2023-11-24		9		12 to 23 months	25 to 34 years	No		No	No	No
1065	30	Female	Parent	Married	Others		less than 60.000FCFA	University	Biscuiterie	boulangerie fran!aise	Yes	Yes	No	No	No	Yes	No											13	Girl	Mother		Yes	0	No		No						12 to 23 months	25 to 34 years				No	No
1066	34	Male	Parent	Married	Others		Between 100.001 and 300.000FCFA	University	Biscuiterie	boulangerie fran!aise	Yes	Yes	No	No	No	Yes	No											12	Boy	Father		Yes	9	No		Yes	2023-03-30	2024-01-04		9		12 to 23 months	25 to 34 years	No		No	No	No
1067	31	Female	Parent	Unmarried	Others		less than 60.000FCFA	University	Biscuiterie	entr!e jesus care	Yes	No							No	No	No	No	Yes	No	No	No		26	Girl	Father		No										24 to 35 months	25 to 34 years				No	No
1068	36	Female	Parent	Married	Housekeeper		I don't know	Primary	Biscuiterie	entr!e jesus care	Yes	Yes	No	No	No	Yes	No											28	Boy	Mother		Yes	9	Yes	15	No						24 to 35 months	>= 35 years				No	No
1069	50	Male	Guadian	Married	Others		Between 60.001 and 100.000FCFA	Secondary	Biscuiterie	entr!e jesus care	No	No							No	Yes	Yes	Yes	No	No	No	No		30	Girl	Mother		No										24 to 35 months	>= 35 years				Yes	Yes
1070	23	Female	Parent	Unmarried	Housekeeper		less than 60.000FCFA	Primary	Biscuiterie	entr!e jesus care	Yes	Yes	No	Yes	No	Yes	No											24	Boy	Mother		Yes	6	No		Yes	2022-03-20	2022-12-23		9		24 to 35 months	<= 24 years	No		No	No	No
1071	35	Female	Parent	Married	Others		Between 100.001 and 300.000FCFA	University	Biscuiterie	entr!e jesus care	Yes	No							Yes	No	Yes	Yes	No	No	No	No		25	Boy	Mother		I don't know		No		Yes	2022-02-25	2022-11-25		9		24 to 35 months	>= 35 years	No		No	No	No
1072	26	Female	Parent	Unmarried	Others		Between 60.001 and 100.000FCFA	University	Biscuiterie	entr!e jesus care	Yes	Yes	Yes	No	No	No	No											12	Girl	Mother		Yes	11	No		Yes	2023-03-17	2024-02-21		11		12 to 23 months	25 to 34 years	Yes		Yes	No	Yes
1073	45	Female	Guadian	Married	Others		Between 100.001 and 300.000FCFA	University	Biscuiterie	entr!e jesus care	No	No							Yes	Yes	No	No	No	No	No	No		15	Girl	Mother		Yes	9	No		Yes	2022-09-15	2023-06-16		9		12 to 23 months	>= 35 years	No		No	Yes	Yes
1074	40	Female	Parent	Married	Others		Between 60.001 and 100.000FCFA	University	Biscuiterie	entr!e jesus care	Yes	Yes	Yes	No	No	No	No											13	Girl	Father		Yes	10	No		Yes	2023-02-18	2023-11-20		9		12 to 23 months	>= 35 years	No		No	No	No
1075	30	Female	Parent	Unmarried	Others		I don't know	Secondary	Biscuiterie	entr!e jesus care	No	No							Yes	No	Yes	No	No	No	No	No		13	Boy	Mother		No										12 to 23 months	25 to 34 years				Yes	Yes
1076	27	Female	Parent	Unmarried	Others		Between 100.001 and 300.000FCFA	University	Biscuiterie	entr!e jesus care	Yes	Yes	Yes	No	No	No	No											32	Girl	Mother		Yes	9	No		Yes	2021-07-01	2022-04-01		9		24 to 35 months	25 to 34 years	No		No	No	No
1077	29	Female	Parent	Married	Others		Between 100.001 and 300.000FCFA	University	Biscuiterie	entr!e jesus care	Yes	Yes	No	No	No	Yes	No											34	Boy	Mother		No										24 to 35 months	25 to 34 years				No	No
1078	34	Female	Parent	Unmarried	Others		Between 60.001 and 100.000FCFA	Secondary	Biscuiterie	entr!e jesus care	Yes	Yes	No	No	No	Yes	No											14	Boy	Mother		Yes	9	No		Yes	2023-01-04	2023-10-06		9		12 to 23 months	25 to 34 years	No		No	No	No
1079	30	Female	Parent	Unmarried	Others		Between 100.001 and 300.000FCFA	University	Biscuiterie	entr!e jesus care	Yes	Yes	Yes	No	No	Yes	No											13	Boy	Mother		Yes	9	No		Yes	2023-02-10	2023-11-10		9		12 to 23 months	25 to 34 years	No		No	No	No
1080	26	Female	Parent	Unmarried	Others		Between 60.001 and 100.000FCFA	Secondary	Biscuiterie	chapelle Obili	Yes	Yes	No	No	No	Yes	No											26	Girl	Mother		Yes	9	No		Yes	2021-12-25	2022-09-27		9		24 to 35 months	25 to 34 years	No		No	No	No
1081	22	Female	Parent	Unmarried	Others		less than 60.000FCFA	Secondary	Biscuiterie	chapelle Obili	Yes	Yes	Yes	No	No	Yes	No											26	Girl	Mother		I don't know		No		Yes	2022-01-14	2022-10-14		9		24 to 35 months	<= 24 years	No		No	No	No
1082	28	Female	Parent	Married	Others		Between 100.001 and 300.000FCFA	University	Biscuiterie	chapelle Obili	Yes	Yes	No	No	No	Yes	No											12	Girl	Mother		Yes	9	No		Yes	2023-02-04	2023-11-10		9		12 to 23 months	25 to 34 years	No		No	No	No
1083	27	Female	Parent	Unmarried	Others		Between 60.001 and 100.000FCFA	Secondary	Biscuiterie	chapelle Obili	Yes	No							Yes	No	No	No	No	No	No	No		12	Boy	Mother		No										12 to 23 months	25 to 34 years				No	No
1084	26	Female	Parent	Unmarried	Others		less than 60.000FCFA	Secondary	Biscuiterie	chapelle Obili	Yes	Yes	Yes	No	No	No	No											26	Girl	Mother		Yes	9	Yes	15	Yes	2022-01-01	2022-10-07	2023-04-07	9	15	24 to 35 months	25 to 34 years	No	No	No	No	No
1085	24	Female	Parent	Unmarried	Others		Between 100.001 and 300.000FCFA	University	Biscuiterie	chapelle Obili	Yes	Yes	No	No	No	Yes	No											14	Boy	Mother		Yes	9	No		Yes	2023-01-10	2023-10-13		9		12 to 23 months	<= 24 years	No		No	No	No
1086	23	Female	Parent	Unmarried	Others		Between 60.001 and 100.000FCFA	Secondary	Biscuiterie	chapelle Obili	Yes	Yes	Yes	No	No	No	No											28	Girl	Mother		Yes	9	Yes	15	No						24 to 35 months	<= 24 years				No	No
1087	25	Female	Parent	Married	Others		Between 100.001 and 300.000FCFA	University	Biscuiterie	chapelle Obili	Yes	Yes	Yes	No	No	No	No											20	Girl	Mother		Yes	9	No		Yes	2022-07-27	2023-04-27		9		12 to 23 months	25 to 34 years	No		No	No	No
1088	23	Female	Parent	Unmarried	Others		Between 60.001 and 100.000FCFA	University	Biscuiterie	chapelle Obili	Yes	Yes	Yes	No	No	No	No											15	Boy	Mother		No										12 to 23 months	<= 24 years				No	No
1089	28	Female	Parent	Unmarried	Others		Between 60.001 and 100.000FCFA	Secondary	Biscuiterie	chapelle Obili	Yes	Yes	Yes	No	No	Yes	No											26	Girl	Mother		Yes	9	Yes	15	Yes	2022-01-05	2022-10-05	2023-04-07	9	15	24 to 35 months	25 to 34 years	No	No	No	No	No
1090	20	Female	Parent	Unmarried	Others		I don't know	Secondary	Biscuiterie	chapelle Obili	Yes	Yes	Yes	No	No	No	No											12	Boy	Mother		Yes	10	No		Yes	2023-03-10	2023-12-15		9		12 to 23 months	<= 24 years	No		No	No	No
1091	30	Male	Parent	Married	Others		Between 100.001 and 300.000FCFA	University	Biscuiterie	hotel santa belle	Yes	Yes	Yes	No	No	Yes	No											12	Girl	Uncle		Yes	0	No		No						12 to 23 months	25 to 34 years				No	No
1092	30	Female	Parent	Married	Others		Between 60.001 and 100.000FCFA	University	Biscuiterie	hotel santa belle	Yes	Yes	Yes	No	No	Yes	No											18	Girl	Father		Yes	11	No		Yes	2022-08-22	2023-05-26		9		12 to 23 months	25 to 34 years	No		No	No	No
1093	18	Female	Parent	Unmarried	Others		less than 60.000FCFA	Secondary	Biscuiterie	hotel santa belle	Yes	Yes	Yes	No	No	No	No											12	Girl	Mother		Yes	9	No		Yes	2023-03-03	2023-12-15		9		12 to 23 months	<= 24 years	No		No	No	No
1094	35	Female	Parent	Unmarried	Others		I don't know	Primary	Biscuiterie	hotel santa belle	No	No							Yes	Yes	No	No	No	Yes	No	No		34	Boy	Aunt		No										24 to 35 months	>= 35 years				Yes	Yes
1095	29	Female	Parent	Unmarried	Housekeeper		less than 60.000FCFA	University	Biscuiterie	hotel santa belle	Yes	Yes	No	No	Yes	Yes	No											25	Girl	Father		Yes	11	Yes	17	Yes	2022-02-14	2023-01-16	2023-07-07	11	16	24 to 35 months	25 to 34 years	Yes	No	Yes	No	Yes
1096	26	Female	Parent	Unmarried	Others		less than 60.000FCFA	Secondary	Biscuiterie	hotel santa belle	Yes	Yes	Yes	No	No	Yes	No											12	Girl	Mother		Yes	10	No		Yes	2023-02-22	2023-12-06		9		12 to 23 months	25 to 34 years	No		No	No	No
1097	31	Female	Parent	Unmarried	Others		I don't know	Secondary	Biscuiterie	humanity	Yes	No							No	Yes	Yes	No	No	No	No	No		17	Girl	Mother		No										12 to 23 months	25 to 34 years				No	No
1098	30	Female	Parent	Unmarried	Others		Between 60.001 and 100.000FCFA	Secondary	Biscuiterie	humanity	Yes	Yes	Yes	No	No	Yes	No											16	Girl	Mother		Yes	0	No		No						12 to 23 months	25 to 34 years				No	No
1099	30	Male	Parent	Married	Others		Between 60.001 and 100.000FCFA	University	Biscuiterie	humanity	Yes	Yes	Yes	No	No	No	No											12	Girl	Mother		Yes	11	No		Yes	2022-05-13	2023-02-17		9		12 to 23 months	25 to 34 years	No		No	No	No
1100	32	Female	Parent	Unmarried	Others		I don't know	Secondary	Biscuiterie	humanity	Yes	Yes	No	No	No	Yes	No											12	Girl	Mother		No										12 to 23 months	25 to 34 years				No	No
1101	28	Female	Parent	Unmarried	Others		Between 60.001 and 100.000FCFA	University	Biscuiterie	humanity	Yes	Yes	No	No	No	Yes	No											17	Girl	Mother		No										12 to 23 months	25 to 34 years				No	No
1102	26	Male	Parent	Unmarried	Others		less than 60.000FCFA	Secondary	Biscuiterie	humanity	Yes	Yes	No	No	No	Yes	No											14	Girl	Mother		Yes	9	No		Yes	2023-01-04	2023-10-06		9		12 to 23 months	25 to 34 years	No		No	No	No
1103	25	Female	Parent	Unmarried	Others		I don't know	University	Biscuiterie	humanity	Yes	Yes	No	No	No	Yes	No											26	Boy	Mother		No										24 to 35 months	25 to 34 years				No	No
1104	31	Male	Guadian	Unmarried	Others		Between 60.001 and 100.000FCFA	Secondary	Biscuiterie	humanity	Yes	Yes	Yes	No	No	Yes	No											27	Girl	Mother		I don't know		I don't know		No						24 to 35 months	25 to 34 years				No	No
1105	27	Female	Parent	Unmarried	Others		Between 100.001 and 300.000FCFA	Secondary	Biscuiterie	humanity	Yes	Yes	Yes	No	No	Yes	No											17	Girl	Mother		No										12 to 23 months	25 to 34 years				No	No
1106	22	Female	Parent	Unmarried	Others		I don't know	Secondary	Biscuiterie	grand canari	Yes	Yes	Yes	No	No	Yes	No											12	Boy	Mother		Yes	0	No		Yes	2023-02-27	2023-11-29		9		12 to 23 months	<= 24 years	No		No	No	No
1107	40	Male	Parent	Married	Others		Between 100.001 and 300.000FCFA	University	Biscuiterie	grand canari	Yes	Yes	Yes	No	No	No	No											18	Boy	Mother		I don't know		I don't know		Yes	2022-11-08	2023-08-11	2024-02-14	9	15	12 to 23 months	>= 35 years	No	No	No	No	No
1108	38	Female	Parent	Married	Others		Between 100.001 and 300.000FCFA	University	Biscuiterie	grand canari	Yes	Yes	No	No	No	Yes	No											26	Boy	Mother		Yes	9	Yes	15	No						24 to 35 months	>= 35 years				No	No
1109	23	Female	Parent	Unmarried	Others		less than 60.000FCFA	University	Biscuiterie	grand canari	Yes	Yes	No	No	No	Yes	No											12	Girl	Mother		Yes	0	No		Yes	2023-03-18	2023-12-18		9		12 to 23 months	<= 24 years	No		No	No	No
1110	42	Female	Parent	Unmarried	Housekeeper		More than 300.000FCFA	University	Biscuiterie	grand canari	Yes	Yes	Yes	Yes	No	Yes	No											20	Girl	Mother		Yes	9	No		Yes	2022-07-03	2023-04-07		9		12 to 23 months	>= 35 years	No		No	No	No
1111	29	Female	Parent	Unmarried	Others		Between 60.001 and 100.000FCFA	Secondary	Biscuiterie	grand canari	Yes	Yes	Yes	Yes	No	Yes	No											12	Boy	Mother		No										12 to 23 months	25 to 34 years				No	No
1112	29	Female	Parent	Married	Others		Between 60.001 and 100.000FCFA	University	Biscuiterie	grand canari	Yes	Yes	Yes	No	No	Yes	No											24	Girl	Mother		Yes	9	Yes	15	Yes	2022-01-08	2022-10-10	2023-05-10	9	16	24 to 35 months	25 to 34 years	No	No	No	No	No
1113	24	Female	Parent	Unmarried	Others		I don't know	University	Biscuiterie	grand canari	Yes	Yes	Yes	No	Yes	Yes	No											18	Girl	Mother		Yes	9	Yes	15	No						12 to 23 months	<= 24 years				No	No
1114	30	Male	Parent	Unmarried	Others		less than 60.000FCFA	Secondary	Biscuiterie	grand canari	No	No							No	Yes	No	No	No	No	No	No		35	Boy	Father		No										24 to 35 months	25 to 34 years				Yes	Yes
1115	30	Female	Parent	Unmarried	Others		Between 60.001 and 100.000FCFA	University	Biscuiterie	grand canari	Yes	Yes	Yes	No	Yes	No	No											15	Boy	Mother		No										12 to 23 months	25 to 34 years				No	No
1116	36	Female	Parent	Married	Housekeeper		I don't know	Secondary	Biscuiterie	grand canari	Yes	Yes	Yes	No	No	Yes	No											13	Girl	Mother		Yes	0	No		Yes	2023-02-20	2023-11-20		9		12 to 23 months	>= 35 years	No		No	No	No
1117	25	Female	Parent	Unmarried	Others		I don't know	Secondary	Biscuiterie	grand canari	Yes	Yes	Yes	No	No	No	No											13	Girl	Mother		Yes	0	No		Yes	2023-02-16	2023-11-16		9		12 to 23 months	25 to 34 years	No		No	No	No
1118	27	Female	Parent	Unmarried	Others		I don't know	Primary	Biscuiterie	grand canari	Yes	Yes	No	Yes	No	Yes	No											17	Girl	Mother		Yes	9	Yes	15	Yes	2022-09-01	2023-06-02	2023-12-04	9	15	12 to 23 months	25 to 34 years	No	No	No	No	No
1119	33	Female	Parent	Married	Housekeeper		I don't know	Primary	Biscuiterie	grand canari	Yes	Yes	Yes	No	Yes	Yes	No											12	Boy	Mother		Yes	9	No		Yes	2023-03-29	2023-12-29		9		12 to 23 months	25 to 34 years	No		No	No	No
1120	29	Female	Parent	Unmarried	Others		Between 60.001 and 100.000FCFA	Secondary	Biscuiterie	grand canari	Yes	Yes	No	No	No	Yes	No											12	Girl	Mother		Yes	0	No		Yes	2023-03-03	2023-12-08		9		12 to 23 months	25 to 34 years	No		No	No	No
1121	26	Female	Parent	Unmarried	Others		less than 60.000FCFA	Secondary	Biscuiterie	mosqu! Obili	Yes	Yes	Yes	No	No	Yes	No											12	Boy	Mother		No										12 to 23 months	25 to 34 years				No	No
1122	37	Female	Parent	Unmarried	Others		Between 60.001 and 100.000FCFA	University	Biscuiterie	mosqu! Obili	Yes	No							No	No	No	No	Yes	No	No	No		12	Girl	Mother		No										12 to 23 months	>= 35 years				No	No
1123	32	Female	Parent	Married	Housekeeper		Between 60.001 and 100.000FCFA	Secondary	Biscuiterie	mosqu! Obili	Yes	Yes	Yes	Yes	No	No	No											14	Boy	Mother		Yes	9	No		Yes	2023-01-30	2023-10-30		9		12 to 23 months	25 to 34 years	No		No	No	No
1124	35	Female	Guadian	Married	Others		Between 100.001 and 300.000FCFA	University	Biscuiterie	mosqu! Obili	Yes	Yes	Yes	No	No	Yes	No											12	Boy	Others	grand Mother	Yes	0	No		No						12 to 23 months	>= 35 years				No	No
1125	29	Female	Parent	Unmarried	Others		less than 60.000FCFA	Secondary	Biscuiterie	mosqu! Obili	Yes	Yes	No	No	No	Yes	No											13	Boy	Mother		I don't know		No		Yes	2023-02-01	2023-11-03		9		12 to 23 months	25 to 34 years	No		No	No	No
1126	27	Female	Parent	Unmarried	Others		less than 60.000FCFA	Secondary	Biscuiterie	mosqu! Obili	Yes	Yes	Yes	No	No	Yes	No											12	Girl	Mother		Yes	9	No		Yes	2023-02-26	2023-11-27		9		12 to 23 months	25 to 34 years	No		No	No	No
1127	30	Female	Parent	Unmarried	Others		less than 60.000FCFA	University	Biscuiterie	mosqu! Obili	Yes	Yes	Yes	No	No	No	No											22	Girl	Mother		Yes	0	Yes	0	Yes	2022-05-22	2023-02-22	2023-08-25	9	15	12 to 23 months	25 to 34 years	No	No	No	No	No
1128	33	Female	Parent	Married	Housekeeper		I don't know	Secondary	Biscuiterie	mosqu! Obili	Yes	Yes	No	No	No	Yes	No											20	Girl	Mother		Yes	9	No		Yes	2022-07-07	2023-04-07		9		12 to 23 months	25 to 34 years	No		No	No	No
1129	30	Female	Parent	Unmarried	Others		Between 100.001 and 300.000FCFA	University	Biscuiterie	mosqu! Obili	Yes	Yes	No	No	Yes	Yes	No											12	Girl	Mother		Yes	9	No		Yes	2023-01-12	2023-10-16		9		12 to 23 months	25 to 34 years	No		No	No	No
1130	29	Female	Parent	Unmarried	Others		Between 60.001 and 100.000FCFA	Secondary	Biscuiterie	mosqu! Obili	Yes	Yes	Yes	No	Yes	Yes	No											14	Girl	Mother		Yes	9	No		Yes	2023-01-03	2023-10-06		9		12 to 23 months	25 to 34 years	No		No	No	No
1131	27	Female	Parent	Unmarried	Others		less than 60.000FCFA	Secondary	Biscuiterie	mosqu! Obili	Yes	Yes	Yes	No	No	Yes	No											12	Boy	Mother		Yes	9	No		Yes	2023-03-03	2023-12-06		9		12 to 23 months	25 to 34 years	No		No	No	No
1132	33	Male	Parent	Unmarried	Others		Between 100.001 and 300.000FCFA	University	Biscuiterie	mosqu! Obili	Yes	Yes	Yes	No	No	Yes	No											25	Girl	Father		Yes	0	Yes	0	Yes	2022-02-06	2022-11-09	2023-05-12	9	15	24 to 35 months	25 to 34 years	No	No	No	No	No
1133	35	Female	Parent	Married	Housekeeper		I don't know	Primary	Biscuiterie	mosqu! Obili	Yes	Yes	No	No	No	Yes	No											12	Boy	Mother		No										12 to 23 months	>= 35 years				No	No
1134	29	Female	Parent	Unmarried	Others		less than 60.000FCFA	Secondary	Biscuiterie	mosqu! Obili	Yes	Yes	No	Yes	Yes	Yes	No											14	Boy	Mother		I don't know		No		Yes	2022-12-07	2023-09-12		9		12 to 23 months	25 to 34 years	No		No	No	No
1135	25	Female	Parent	Unmarried	Others		Between 60.001 and 100.000FCFA	Secondary	Biscuiterie	mosqu! Obili	Yes	Yes	No	No	No	Yes	No											12	Boy	Mother		Yes	0	No		Yes	2023-03-16	2023-12-18		9		12 to 23 months	25 to 34 years	No		No	No	No
